# Supplementary material for: Diverse enantioselective synthesis of hetero[7]helicenes via an organocatalyzed double annulation strategy
Source: Royal Society of Chemistry journal article supplement (doi:10.1039/d4qo02188f), 2024-12-23

## Table of contents

|                                                                |    |
|----------------------------------------------------------------|----|
| General Information .....                                      | 2  |
| Proposed mechanism.....                                        | 3  |
| Synthesis of the starting materials.....                       | 3  |
| Enantioselective synthesis of helicoid 4a .....                | 5  |
| Enantioselective synthesis of heterohelicenes 5.....           | 6  |
| Enantioselective synthesis of heterohelicenes 6.....           | 14 |
| Thermal racemization study of helicene product 5a and 6a ..... | 21 |
| Large-scale asymmetric synthesis of 5a and 6a.....             | 22 |
| Derivatizations of the chiral azahelicene products .....       | 23 |
| Optical properties of the products .....                       | 26 |
| Reference.....                                                 | 31 |
| X-ray structure.....                                           | 32 |
| HPLC traces .....                                              | 36 |
| NMR spectra.....                                               | 66 |

## General Information

Unless otherwise noted, all commercial reagents were used without further purification. Dichloromethane, toluene, ether, THF were purified by passage through an activated alumina column under argon. Thin-layer chromatography (TLC) analysis of reaction mixtures was performed using Huanghai silica gel HSGF254 TLC plates, and visualized under UV or by staining with ceric ammonium molybdate or potassium permanganate. Flash column chromatography was carried out on Huanghai Silica Gel HHGJ-300, 300-400 mesh. Nuclear magnetic resonance (NMR) spectra were recorded using Bruker Avance III HD spectrometer (FT, 500 MHz for  $^1\text{H}$ , 126 MHz for  $^{13}\text{C}$ , or 400 MHz for  $^1\text{H}$ , 101 MHz for  $^{13}\text{C}$ ,  $(\text{CD}_3)_2\text{SO}$ ,  $\delta\text{H} = 2.50$  and  $\delta\text{C} = 39.52$ ).  $^1\text{H}$  and  $^{13}\text{C}$  chemical shifts are reported in ppm downfield of tetramethylsilane and referenced to residual solvent peak ( $\text{CDCl}_3$ ,  $\delta\text{H} = 7.26$  and  $\delta\text{C} = 77.16$ ). Multiplicities are reported using the following abbreviations: s = singlet, d = doublet, t = triplet, q = quartet, m = multiplet, br = broad resonance. FT-IR spectra were recorded on ThermoFisher Scientific Nicolet iS7 Spectrometer, and absorption frequencies are reported in reciprocal centimeters ( $\text{cm}^{-1}$ ). Mass spectral data were obtained from the Agilent Technologies 6230 TOF LC/MS spectrometer in electrospray ionization ( $\text{ESI}^+$ ) mode. Optical rotations were measured with an Autopol V Plus/VI digital polarimeter. Enantiomeric excesses were determined on an Agilent 1260 Chiral HPLC using IA, IB, IC columns. Absorbance analysis was performed on Agilent Cary 5000 UV-Vis Spectrophotometer using PbSmart detector. Fluorescence analysis was performed on Fluorolog-3 from Horiba Jobin Yvon. The circularly polarized luminescence (CPL) spectra were recorded with a JASCO CPL-300 spectrometer at room temperature. Circular dichroism spectra (CD) were recorded on Chirascan Circular Dichroism Spectrometer from Applied Photophysics. Unless otherwise noted, CD analysis, absorbance analysis and fluorescence analysis were performed at 20 °C with 1.0 cm x 1.0 cm quartz cell. The racemic products were synthesized using the same procedure for the chiral products, unless the racemic CPA catalyst ( $\pm$ )-**A9** was used instead.

## Proposed mechanism

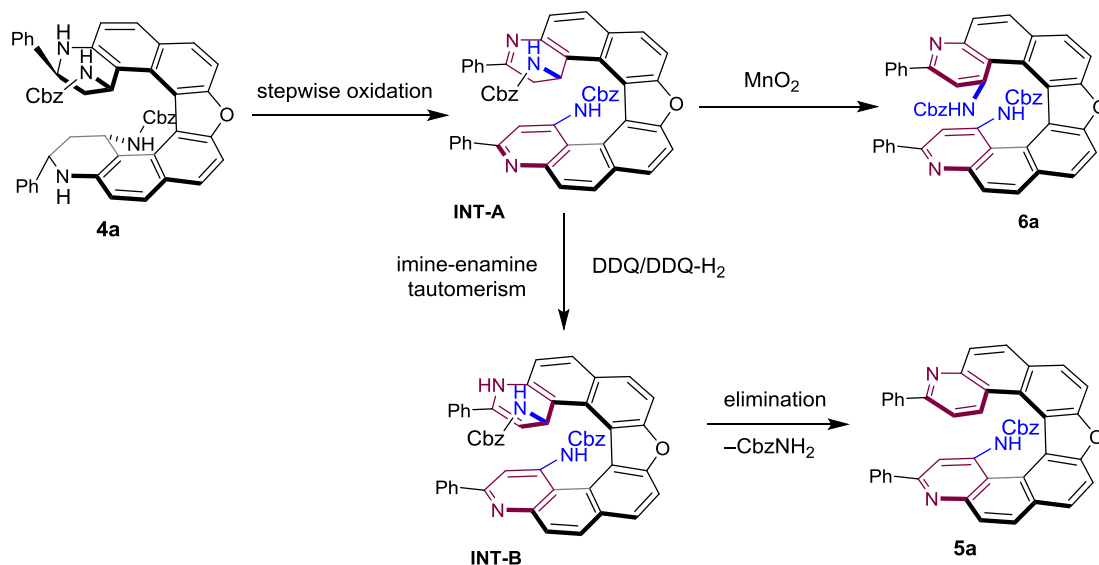

**Scheme S1.** Proposed reaction mechanism for the formation of diverse azahelicenes under varied conditions

## Synthesis of the starting materials

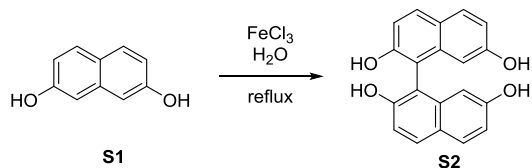

This procedure was adopted from the literature.<sup>1</sup>

To a solution of **S1** (62.4 mmol, 10.0 g, 1.0 equiv.) in water (200 mL) was added a solution of **FeCl<sub>3</sub>** (94 mmol, 15.2 g, 1.5 equiv.) in water (200 mL) at rt, and the mixture was warmed to 100 °C. After stirring overnight at this temperature, the reaction was cooled to rt and then extracted with ethyl acetate for three times. The organic layers were combined, dried over **Na<sub>2</sub>SO<sub>4</sub>** and concentrated under vacuum to give a residue, which was purified by column chromatography (Petroleum ether: EtOAc = 3:1) to give **S2** (7.8 g, yield = 78%) as a yellow solid.

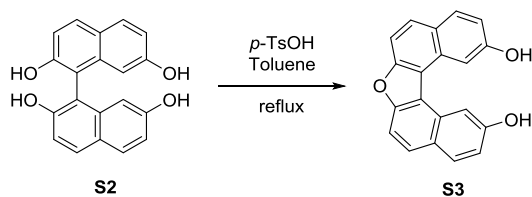

This procedure was adopted from the literature.<sup>1</sup>

**S2** (18.8 mmol, 6.0 g, 1.0 equiv.) was dissolved in toluene (60 mL), and the solution was heated to reflux after added *p*-TsOH (18.8 mmol, 3.60 g, 1.0 equiv.). After stirring overnight, the mixture was cooled to ambient temperature. After diluting with ethyl acetate, the mixture was filtered through Celite and then washed by saturated aqueous NaHCO<sub>3</sub> solution for 3 times. The organic layers were combined, dried over Na<sub>2</sub>SO<sub>4</sub> and concentrated under vacuum to give a residue, which was purified by column chromatography (DCM: EtOAc = 10:1) to give the corresponding **S3** as a white solid (4.1 g, yield = 73%).

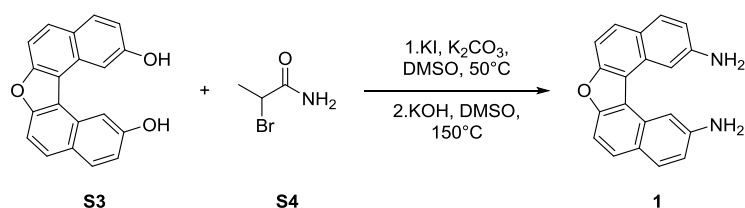

This procedure was adopted from the literature.<sup>2</sup>

To a solution of **S3** (4.9 mmol, 1.47 g, 1.0 equiv.) in DMSO (10 mL/mmol) was added amide **S4** (14.7 mmol, 2.2 g, 3.0 equiv.), K<sub>2</sub>CO<sub>3</sub> (14.7 mmol, 2.0 g, 3.0 equiv.) and KI (1.0 mmol, 166 mg, 20 mol%) sequentially at r.t.. The resulting solution was stirred for 12 h at 50 °C until complete consumption of **S3** (monitored by TLC analysis). The reaction mixture was cooled to r.t., and KOH (49 mmol, 2.75 mmol, 10.0 equiv.) was added in one portion. The reaction was warmed to 150 °C and stirred for another 8 h. After cooling to room temperature, water was added and the mixture was extracted with ethyl acetate. The organic layer was washed with brine, dried over anhydrous Na<sub>2</sub>SO<sub>4</sub> and evaporated under vacuum to give a residue, which was purified by column chromatography (Petroleum ether: EtOAc = 1:1) to give the corresponding polycyclic arylamine **1a** as a brown solid (950 mg, yield = 65%).

dinaphtho[2,1-b:1',2'-d]furan-2,12-diamine (**1a**)

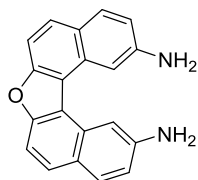

<sup>1</sup>H NMR (400 MHz, DMSO) δ 8.10 (d, *J* = 2.1 Hz, 1H), 7.80 (dd, *J* = 17.8, 8.7 Hz, 2H), 7.50 (d, *J* = 8.7 Hz, 1H), 7.01 (dd, *J* = 8.6, 2.0 Hz, 1H), 5.84 (s, 2H). <sup>13</sup>C NMR (126 MHz, DMSO) δ 154.4, 148.0, 131.2, 130.6, 128.6, 124.1, 117.5, 116.2, 107.7, 106.5.



benzyl vinylcarbamate (**2**)

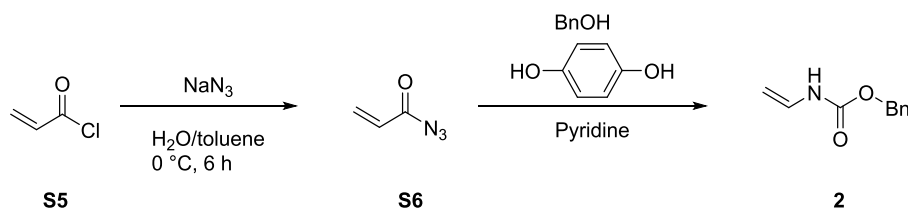

This procedure was adopted from the literature, and the  $^1\text{H}$  NMR data matched with the literature.<sup>3</sup> To a solution of  $\text{NaN}_3$  (1.95 g, 30 mmol, 1.0 eq.) in  $\text{H}_2\text{O}$  (14 mL) was added a solution of acryloyl chloride **S5** (2.4 mL, 30 mmol) in toluene (18 mL) dropwisely at  $0\text{ }^\circ\text{C}$ . After stirring for 6 h at this temperature, toluene (ca. 20 mL) was added to dilute the reaction mixture and the mixture was washed by saturated aqueous  $\text{NaHCO}_3$  solution. The organic layers were combined, dried over  $\text{Na}_2\text{SO}_4$  and filtered to give a solution of **S6**, which was used directly for next step without further purification.

To the solution of **S6** was successively added  $\text{BnOH}$  (3.7 mL, 36 mmol, 1.2 eq.), pyridine (1.2 mL, 15 mmol, 0.5 eq.) and hydroquinone (165 mg, 5 mol%) at rt. After stirring for 3 h, this reaction mixture was concentrated under vacuum to give a residue, which was purified by column chromatography (petroleum ether:  $\text{EtOAc}$  = 8:1) to give benzyl vinylcarbamate (**2**) as a white solid (3.0 g, 56% yield for 2 steps).

$^1\text{H}$  NMR (500 MHz,  $\text{CDCl}_3$ )  $\delta$  7.41 – 7.28 (m, 6H), 6.71 (dt,  $J$  = 16.1, 10.0 Hz, 1H), 6.57 – 6.30 (m, 1H), 5.15 (s, 2H), 4.48 (d,  $J$  = 15.7 Hz, 1H), 4.30 (d,  $J$  = 8.7 Hz, 1H).

### Enantioselective synthesis of heliceneoid **4a**

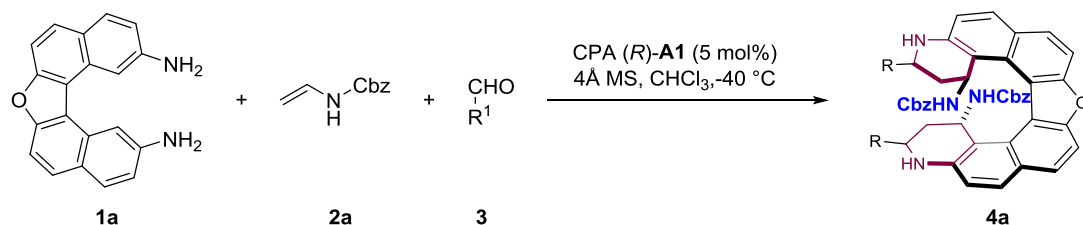

Diamine **1a** (0.1 mmol), CPA (*R*)-**A1** (0.005 mmol, 5 mol%) and activated  $4\text{ \AA}$  molecular sieves (ca. 50 mg) were placed in a reaction tube and chloroform (1.5 mL) was added into this reaction mixture via syringe, which was followed by adding the corresponding aldehyde **3** (0.4 mmol, 4.0 equiv.). After stirring at rt for about 0.5 h., this reaction mixture was cooled to  $-40\text{ }^\circ\text{C}$ , and a solution of

enamide **2a** (0.4 mmol, 4.0 equiv.) in  $\text{CHCl}_3$  (0.5 mL) was added slowly into the reaction mixture via syringe and the mixture was stirred at the same temperature for additional 12 h. After the completion of the cycloaddition step as monitored by TLC analysis, the mixture was concentrated under vacuum to give a residue, which was purified by column chromatography on silica gel using petroleum ether/ethyl acetate as eluent to afford the corresponding **4a**.

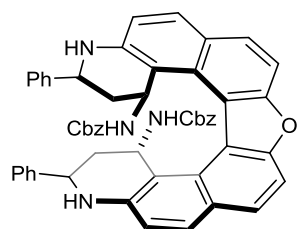

Starting from 0.1 mmol of **1a**, **4a** was afforded as a light yellow solid (77 mg, 94% yield). Column chromatography eluent : petroleum ether : EtOAc = 5:1.

$^1\text{H}$  NMR (500 MHz,  $\text{CDCl}_3$ )  $\delta$  8.04 – 7.71 (m, 1H), 7.70 – 7.62 (m, 1H), 7.59 – 7.40 (m, 3H), 7.35 (t,  $J$  = 7.5 Hz, 2H), 7.29 (d,  $J$  = 7.4 Hz, 1H), 7.26 – 7.19 (m, 3H), 7.12 – 6.88 (m, 3H), 6.03 – 5.84 (m, 1H), 4.85 – 4.77 (m, 1H), 4.46 (d,  $J$  = 12.1 Hz, 1H), 4.18 (d,  $J$  = 12.0 Hz, 1H), 3.82 – 3.70 (m, 1H), 2.89 – 2.67 (m, 1H), 1.87 – 1.67 (m, 1H).  $^{13}\text{C}$  NMR (126 MHz,  $\text{CDCl}_3$ )  $\delta$  154.5, 154.1, 145.0, 142.7, 136.5, 130.2, 129.4, 128.9, 128.3, 127.9, 127.8, 127.0, 126.7, 126.6, 118.3, 116.3, 113.2, 107.7, 66.0, 55.4, 48.3, 39.2. HPLC: Chiralpak IA column, 60:40 hexanes/ isopropanol, 1 ml/min,  $t_R$  = 9.5 min (major), 13.9 min (minor), 99% ee.  $m/z$  HRMS (ESI) found  $[\text{M}+\text{H}]^+$  829.3379,  $\text{C}_{54}\text{H}_{45}\text{N}_4\text{O}_5^+$  requires 829.3384.

## Enantioselective synthesis of heterohelices **5**

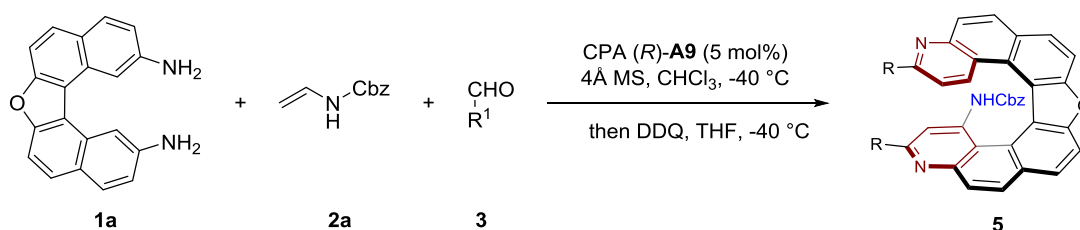

Diamine **1a** (0.1 mmol), CPA (*R*)-**A1** (0.005 mmol, 5 mol%) and activated 4Å molecular sieves (ca. 50 mg) were placed in a reaction tube and chloroform (1.5 mL) was added into this reaction mixture via syringe, which was followed by adding the corresponding aldehyde **3** (0.4 mmol, 4.0 equiv.). After stirring at rt for about 0.5 h., this reaction mixture was cooled to  $-40\text{ }^\circ\text{C}$ , and a

solution of enamide **2a** (0.4 mmol, 4.0 equiv.) in  $\text{CHCl}_3$  (0.5 mL) was added slowly into the reaction mixture via syringe and the mixture was stirred at the same temperature for additional 12 h ~ 24 h. After the completion of the cycloaddition step as monitored by TLC analysis, the mixture was concentrated under vacuum to give a residue. The residue was dissolved in THF (3 mL) and then cooled to  $-40\text{ }^\circ\text{C}$ , which was followed by adding a solution of 1,2-dichloro-4,5-dicyanobenzoquinone (DDQ, 0.6 mmol, 6.0 equiv.) in THF (1 mL). After stirring at  $-40\text{ }^\circ\text{C}$  for another 12 h, the mixture was warmed to room temperature, washed with saturated aqueous  $\text{NaHCO}_3$  and extracted with EtOAc for 3 times. The combine organic layers were dried over  $\text{Na}_2\text{SO}_4$  and concentrated under vacuum to give a residue, which was purified by column chromatography on silica gel using petroleum ether/ethyl acetate or dichloromethane as eluent to afford the corresponding **5**.

#### Heterohelicene **5a**

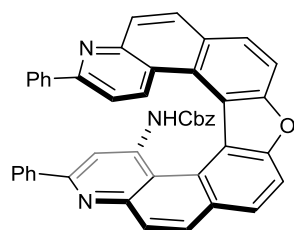

Starting from 0.1 mmol of **1a**, **5a** was afforded as a light yellow solid (47.6 mg, 71% yield). Column chromatography eluent: petroleum ether : EtOAc = 5:1.

$^1\text{H}$  NMR (500 MHz,  $\text{CDCl}_3$ )  $\delta$  8.11 (d,  $J = 8.7$  Hz, 1H), 7.99 (d,  $J = 8.6$  Hz, 1H), 7.95 (d,  $J = 8.8$  Hz, 1H), 7.91 – 7.87 (m, 2H), 7.81 (dt,  $J = 15.8, 8.3$  Hz, 3H), 7.70 (d,  $J = 7.2$  Hz, 4H), 7.46 (s, 1H), 7.27 (d,  $J = 6.3$  Hz, 3H), 7.20 (t,  $J = 7.7$  Hz, 1H), 7.14 (dt,  $J = 19.0, 7.4$  Hz, 3H), 7.07 (t,  $J = 7.5$  Hz, 2H), 6.95 (d,  $J = 6.7$  Hz, 2H), 6.59 (d,  $J = 8.4$  Hz, 1H), 6.22 (d,  $J = 8.4$  Hz, 1H), 5.73 (s, 1H), 4.49 (d,  $J = 11.8$  Hz, 1H), 4.28 (d,  $J = 11.8$  Hz, 1H).  $^{13}\text{C}$  NMR (126 MHz,  $\text{CDCl}_3$ )  $\delta$  157.9, 156.6, 155.5, 155.2, 150.4, 148.7, 148.0, 142.6, 138.2, 135.0, 134.0, 130.9, 130.1, 129.2, 128.9, 128.8, 128.7, 128.5, 128.4, 128.4, 128.3, 128.2, 128.0, 127.9, 127.6, 127.5, 127.3, 127.0, 122.1, 120.5, 118.3, 115.4, 113.2, 111.8, 111.4, 104.5, 66.9. HPLC: Chiralpak IA column, 80:20 hexanes/ isopropanol, 1 ml/min,  $t_R = 7.6$  min (major), 10.9 min (minor), 99% ee.  $[\alpha]_D^{25} = 719$  ( $c = 1.0, \text{CHCl}_3$ ).  $m/z$  HRMS (ESI) found  $[\text{M}+\text{H}]^+$  672.2283,  $\text{C}_{46}\text{H}_{30}\text{N}_3\text{O}_3^+$  requires 672.2282.

### Heterohelicene 5b

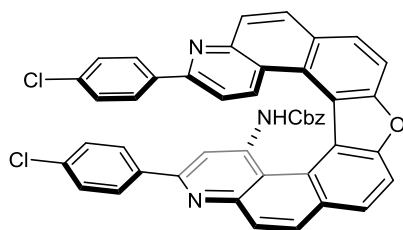

Starting from 0.125 mmol of **1**, **5b** was afforded as a yellow solid (49 mg, 51% yield). Column chromatography eluent : petroleum ether : EtOAc = 5:1.

$^1\text{H}$  NMR (500 MHz,  $\text{CDCl}_3$ )  $\delta$  8.20 (d,  $J = 8.4$  Hz, 1H), 8.16 (dd,  $J = 8.8, 3.5$  Hz, 2H), 8.00 (s, 3H), 7.96 (t,  $J = 1.9$  Hz, 3H), 7.53 (s, 1H), 7.51 – 7.43 (m, 2H), 7.37 – 7.31 (m, 3H), 7.20 (ddd,  $J = 17.7, 7.8, 2.1$  Hz, 2H), 7.07 (t,  $J = 7.8$  Hz, 1H), 7.03 (d,  $J = 7.1$  Hz, 3H), 6.82 (d,  $J = 8.5$  Hz, 1H), 6.35 (d,  $J = 8.4$  Hz, 1H), 5.87 (s, 1H), 4.59 (d,  $J = 11.9$  Hz, 1H), 4.37 (d,  $J = 11.9$  Hz, 1H).  $^{13}\text{C}$  NMR (126 MHz,  $\text{CDCl}_3$ )  $\delta$  155.8, 155.8, 155.5, 154.8, 150.4, 148.8, 148.0, 142.8, 139.9, 139.8, 134.8, 134.7, 134.6, 134.2, 131.2, 130.4, 129.4, 129.4, 129.2, 129.1, 129.0, 128.9, 128.5, 128.2, 127.8, 127.6, 127.1, 127.1, 126.9, 125.4, 125.0, 122.4, 120.5, 118.5, 115.6, 112.9, 112.2, 111.8, 103.8, 67.1. HPLC: Chiralpak IA column, 80:20 hexanes/ isopropanol, 1 ml/min,  $t_R = 8.1$  min (major), 11.0 min (minor), 99% ee.  $[\alpha]_D^{25} = 1016$  ( $c = 1.0$ ,  $\text{CHCl}_3$ ).  $m/z$  HRMS (ESI) found  $[\text{M}+\text{H}]^+ 740.1522$ ,  $\text{C}_{46}\text{H}_{28}\text{Cl}_2\text{N}_3\text{O}_3^+$  requires 740.1502.

### Heterohelicene 5c

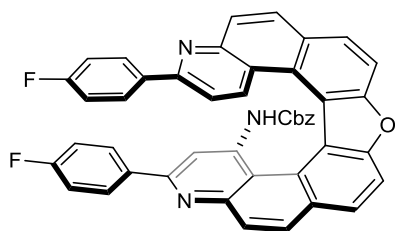

Starting from 0.1 mmol of **1**, **5c** was afforded as a yellow solid (65 mg, 92% yield). Column chromatography eluent : petroleum ether : EtOAc = 5:1.

$^1\text{H}$  NMR (500 MHz,  $\text{CDCl}_3$ )  $\delta$  8.25 – 8.05 (m, 6H), 8.01 (s, 2H), 7.78 (ddd,  $J = 8.6, 5.5, 2.7$  Hz, 4H), 7.53 (s, 1H), 7.33 (dd,  $J = 5.0, 1.9$  Hz, 3H), 7.06 – 6.99 (m, 2H), 6.92 – 6.78 (m, 5H), 6.39 (d,  $J = 8.6$  Hz, 1H), 5.92 (s, 1H), 4.59 (d,  $J = 11.9$  Hz, 1H), 4.37 (d,  $J = 11.9$  Hz, 1H).  $^{13}\text{C}$  NMR (126 MHz,  $\text{CDCl}_3$ \_new)  $\delta$  164.9, 162.9, 156.6, 155.8, 155.5, 155.4, 150.5, 148.8, 148.0, 142.8, 134.9, 134.3, 131.1, 130.3, 129.4, 129.3, 129.1, 129.0, 129.0, 128.9, 128.5, 128.5, 128.1, 127.8, 127.7, 127.1, 122.1, 120.7, 118.6, 118.5, 115.4, 115.2, 115.0, 112.7, 112.1, 111.6, 103.9, 67.0.  $^{19}\text{F}$  NMR (471 MHz,  $\text{CDCl}_3$ )  $\delta$

-112.55, -112.86. HPLC: Chiralpak IA column, 80:20 hexanes/ isopropanol, 1 ml/min,  $t_R = 8.7$  min (major), 12.1 min (minor), 98% ee.  $[\alpha]_D^{25} = 671$  ( $c = 1.0$ ,  $\text{CHCl}_3$ ).  $m/z$  HRMS (ESI) found  $[\text{M}+\text{H}]^+$  708.2112,  $\text{C}_{46}\text{H}_{28}\text{F}_2\text{N}_3\text{O}_3^+$  requires 708.2093.

### Heterohelicene 5d

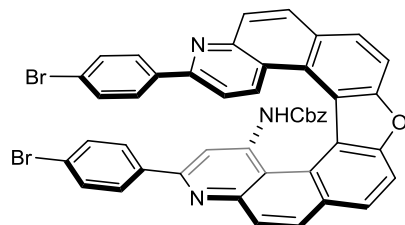

Starting from 0.1 mmol of **1a**, **5d** was afforded as a yellow solid (65 mg, 78% yield). Column chromatography eluent : petroleum ether : EtOAc = 5:1.

$^1\text{H}$  NMR (500 MHz,  $\text{CDCl}_3$ )  $\delta$  8.14 – 8.06 (m, 3H), 8.03 (dt,  $J = 8.8, 2.3$  Hz, 3H), 7.95 (s, 2H), 7.58 (dd,  $J = 8.6, 2.2$  Hz, 4H), 7.44 (s, 1H), 7.35 – 7.31 (m, 2H), 7.30 – 7.27 (m, 2H), 7.25 – 7.21 (m, 2H), 7.02 – 6.97 (m, 2H), 6.67 (d,  $J = 8.5$  Hz, 1H), 6.24 (d,  $J = 8.6$  Hz, 1H), 5.79 (s, 1H), 4.55 (d,  $J = 11.8$  Hz, 1H), 4.33 (d,  $J = 11.8$  Hz, 1H).  $^{13}\text{C}$  NMR (126 MHz,  $\text{CDCl}_3$ )  $\delta$  156.2, 155.7, 155.4, 155.0, 150.4, 148.7, 147.9, 142.6, 136.8, 134.8, 134.1, 131.3, 131.3, 131.1, 130.3, 129.1, 128.9, 128.8, 128.5, 128.1, 127.8, 127.5, 126.8, 124.2, 123.9, 122.1, 120.4, 118.4, 118.4, 115.4, 112.4, 112.1, 111.6, 103.5, 67.0. HPLC: Chiralpak IA column, 80:20 hexanes/ isopropanol, 1 ml/min,  $t_R = 10.4$  min (major), 14.5 min (minor), 99% ee.  $[\alpha]_D^{25} = 939$  ( $c = 1.0$ ,  $\text{CHCl}_3$ ). HRMS (ESI) found  $[\text{M}+\text{H}]^+$  828.0517,  $\text{C}_{46}\text{H}_{28}\text{Br}_2\text{N}_3\text{O}_3^+$  requires 828.0492.

### Heterohelicene 5e

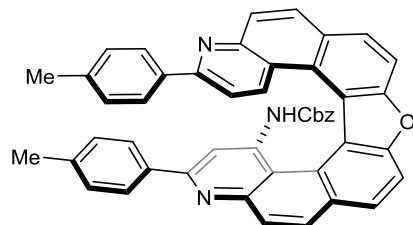

Starting from 0.1 mmol of **1a**, **5e** was afforded as a yellow solid (58.4 mg, 83% yield). Column chromatography eluent : petroleum ether : EtOAc = 5:1.

$^1\text{H}$  NMR (400 MHz,  $\text{CDCl}_3$ )  $\delta$  8.16 (dd,  $J = 14.7, 8.7$  Hz, 2H), 8.11 (s, 2H), 8.04 (dd,  $J = 9.9, 8.7$  Hz, 2H), 8.00 – 7.91 (m, 2H), 7.65 (dd,  $J = 8.2, 1.8$  Hz, 4H), 7.54 (s, 1H), 7.37 – 7.29 (m, 3H), 7.05 – 6.98

(m, 2H), 6.92 (dd,  $J = 15.3, 7.9$  Hz, 4H), 6.83 (d,  $J = 8.5$  Hz, 1H), 6.39 (d,  $J = 8.6$  Hz, 1H), 5.89 (s, 1H), 4.58 (d,  $J = 12.0$  Hz, 1H), 4.35 (d,  $J = 12.0$  Hz, 1H), 2.33 (d,  $J = 15.0$  Hz, 6H).  $^{13}\text{C}$  NMR (126 MHz,  $\text{CDCl}_3$ )  $\delta$  157.9, 156.7, 155.7, 155.4, 150.5, 148.8, 148.0, 142.6, 139.1, 138.7, 135.4, 135.4, 135.0, 134.0, 130.8, 130.0, 129.0, 128.9, 128.8, 128.8, 128.6, 128.5, 128.4, 128.4, 128.0, 127.9, 127.7, 127.4, 127.1, 122.1, 120.8, 118.6, 118.5, 115.4, 113.0, 111.8, 111.3, 104.0, 66.9, 21.3. HPLC: Chiralpak IA column, 80:20 hexanes/ isopropanol, 1 ml/min,  $t_{\text{R}} = 7.8$  min (major), 11.0 min (minor), 98% ee.  $[\alpha]_{\text{D}}^{25} = 1035$  ( $c = 1.0, \text{CHCl}_3$ ). HRMS (ESI) found  $[\text{M}+\text{H}]^+ 700.2615$ ,  $\text{C}_{48}\text{H}_{34}\text{N}_3\text{O}_3^+$  requires 700.2595.

### Heterohelicene 5f

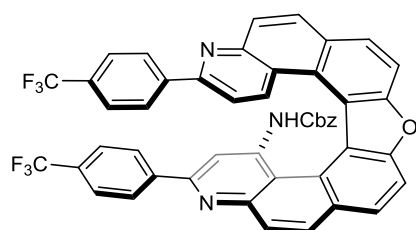

Starting from 0.1 mmol of **1a**, **5f** was afforded as a yellow solid (57 mg, 71% yield). Column chromatography eluent : petroleum ether : EtOAc = 5:1.

$^1\text{H}$  NMR (500 MHz,  $\text{CDCl}_3$ )  $\delta$  8.27 (d,  $J = 8.5$  Hz, 1H), 8.22 (d,  $J = 8.8$  Hz, 1H), 8.21 – 8.16 (m, 2H), 8.13 (dd,  $J = 20.0, 8.8$  Hz, 2H), 8.05 (t,  $J = 6.4$  Hz, 2H), 7.87 (dd,  $J = 13.1, 8.0$  Hz, 4H), 7.61 (s, 1H), 7.40 – 7.29 (m, 6H), 7.05 – 7.00 (m, 2H), 6.92 (d,  $J = 8.4$  Hz, 1H), 6.45 (d,  $J = 8.5$  Hz, 1H), 5.93 (s, 1H), 4.61 (d,  $J = 11.9$  Hz, 1H), 4.39 (d,  $J = 11.9$  Hz, 1H).  $^{13}\text{C}$  NMR (126 MHz,  $\text{CDCl}_3$ )  $\delta$  155.9, 155.6, 154.7, 150.4, 148.9, 148.1, 142.9, 141.3, 134.8, 134.4, 131.3, 130.5, 129.3, 129.0, 129.0, 128.5, 128.5, 128.3, 127.9, 127.7, 127.6, 127.2, 126.9, 125.1, 122.6, 120.5, 118.6, 118.6, 115.7, 113.0, 112.4, 111.9, 104.1, 67.1.  $^{19}\text{F}$  NMR (471 MHz,  $\text{CDCl}_3$ )  $\delta$  -62.91, -62.92. Chiralpak IA column, 80:20 hexanes/ isopropanol, 1 ml/min,  $t_{\text{R}} = 9.5$  min (major), 13.3 min (minor), 99% ee.  $[\alpha]_{\text{D}}^{25} = 957$  ( $c = 1.0, \text{CHCl}_3$ ). HRMS (ESI) found  $[\text{M}+\text{H}]^+ 808.2051$ ,  $\text{C}_{48}\text{H}_{28}\text{F}_6\text{N}_3\text{O}_3^+$  requires 808.2029.

### Heterohelicene 5g

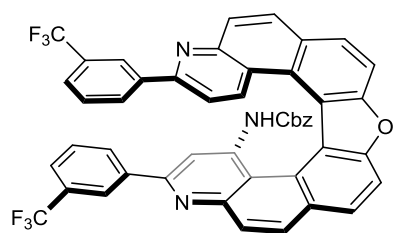

Starting from 0.1 mmol of **1a**, **5g** was afforded as a yellow solid (58 mg, 72% yield). Column chromatography eluent : petroleum ether : EtOAc = 5:1.

$^1\text{H}$  NMR (500 MHz,  $\text{CDCl}_3$ )  $\delta$  8.46 (d,  $J = 2.0$  Hz, 1H), 8.40 (d,  $J = 1.9$  Hz, 1H), 8.20 – 8.04 (m, 6H), 7.99 (s, 2H), 7.63 (d,  $J = 7.8$  Hz, 1H), 7.56 (d,  $J = 19.7$  Hz, 2H), 7.46 (d,  $J = 7.7$  Hz, 1H), 7.42 (d,  $J = 6.6$  Hz, 1H), 7.34 (dd,  $J = 5.0, 2.0$  Hz, 3H), 7.13 (t,  $J = 7.7$  Hz, 1H), 7.08 – 6.99 (m, 3H), 6.77 (d,  $J = 8.5$  Hz, 1H), 6.36 (d,  $J = 8.5$  Hz, 1H), 5.84 (s, 1H), 4.59 (d,  $J = 11.8$  Hz, 1H), 4.36 (d,  $J = 11.8$  Hz, 1H).  $^{13}\text{C}$  NMR (126 MHz,  $\text{CDCl}_3$ )  $\delta$  155.7, 155.5, 155.4, 154.3, 150.4, 148.8, 148.0, 142.8, 138.7, 134.8, 134.2, 131.2, 130.9, 130.8, 130.7, 130.6, 130.4, 129.8, 129.2, 129.0, 128.9, 128.7, 128.5, 128.5, 128.2, 127.9, 127.7, 126.8, 125.8, 125.6, 125.3, 123.7, 123.1, 122.4, 120.4, 118.5, 115.7, 112.5, 112.2, 111.8, 103.6, 67.1.  $^{19}\text{F}$  NMR (471 MHz,  $\text{CDCl}_3$ )  $\delta$  -62.42, -62.42. HPLC: Chiralpak IA column, 90:10 hexanes/ isopropanol, 1 ml/min,  $t_R = 9.5$  min (major), > 99% ee.  $[\alpha]_D^{25} = 1046$  ( $c = 1.0$ ,  $\text{CHCl}_3$ ). HRMS (ESI) found  $[\text{M}+\text{H}]^+ 808.2050$ ,  $\text{C}_{48}\text{H}_{28}\text{F}_6\text{N}_3\text{O}_3^+$  requires 808.2029.

### Heterohelicene **5h**

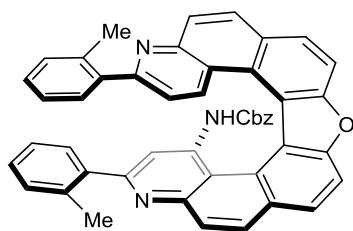

Starting from 0.1 mmol of **1a**, **5h** was afforded as a yellow solid (58 mg, 83% yield). Column chromatography eluent : petroleum ether : EtOAc = 5:1.

$^1\text{H}$  NMR (500 MHz,  $\text{CDCl}_3$ )  $\delta$  8.25 (d,  $J = 8.4$  Hz, 1H), 8.21 – 8.14 (m, 2H), 8.14 – 8.06 (m, 3H), 8.05 – 7.96 (m, 2H), 7.66 (s, 1H), 7.35 – 7.30 (m, 4H), 7.24 (qd,  $J = 7.0, 1.4$  Hz, 2H), 7.20 – 7.13 (m, 2H), 7.09 (dt,  $J = 10.7, 7.6$  Hz, 3H), 7.04 – 6.99 (m, 3H), 6.51 (d,  $J = 8.4$  Hz, 1H), 6.18 (s, 1H), 4.64 (d,  $J = 12.0$  Hz, 1H), 4.40 (d,  $J = 12.0$  Hz, 1H), 2.11 (s, 3H), 2.03 (s, 3H).  $^{13}\text{C}$  NMR (126 MHz,  $\text{CDCl}_3$ )  $\delta$  160.5, 159.8, 155.9, 155.5, 150.6, 148.9, 147.8, 142.3, 139.6, 139.3, 136.9, 136.4, 135.0, 134.0, 131.3, 131.2, 131.0, 130.2, 130.1, 129.9, 129.4, 129.2, 129.1, 128.6, 128.5, 128.4, 128.3, 128.2, 128.2, 128.0, 128.0, 127.6, 125.9, 125.7, 122.0, 121.2, 118.9, 118.8, 117.8, 115.1, 112.2, 111.6, 108.1, 67.0, 20.4, 20.1. HPLC: Chiralpak IA column, 80:20 hexanes/ isopropanol, 1 ml/min,  $t_R = 6.9$  min (major), 11.5

min (minor), 99% ee.  $[\alpha]_D^{25} = 306$  ( $c = 2.0$ ,  $\text{CHCl}_3$ ). HRMS (ESI) found  $[\text{M}+\text{H}]^+ 700.2612$ ,  $\text{C}_{48}\text{H}_{34}\text{N}_3\text{O}_3^+$  requires 700.2595.

### Heterohelicene 5i

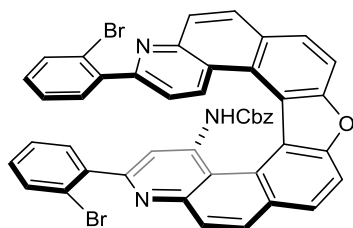

Starting from 0.125 mmol of **1a**, **5g** was afforded as a yellow solid (44 mg, 44% yield). Column chromatography eluent : petroleum ether : EtOAc = 4:1.

$^1\text{H}$  NMR (500 MHz,  $\text{CDCl}_3$ )  $\delta$  8.29 (d,  $J = 8.5$  Hz, 1H), 8.25 – 8.18 (m, 2H), 8.15 (d,  $J = 8.6$  Hz, 2H), 8.09 (d,  $J = 8.9$  Hz, 1H), 8.02 (q,  $J = 8.5$  Hz, 2H), 7.83 (s, 1H), 7.55 (dd,  $J = 15.5, 7.9$  Hz, 2H), 7.34 (tt,  $J = 7.1, 4.4$  Hz, 5H), 7.18 (dddd,  $J = 19.0, 8.9, 5.3, 1.6$  Hz, 4H), 7.07 – 7.00 (m, 3H), 6.82 (d,  $J = 8.5$  Hz, 1H), 6.19 (s, 1H), 4.63 (d,  $J = 11.9$  Hz, 1H), 4.42 (d,  $J = 12.0$  Hz, 1H).  $^{13}\text{C}$  NMR (126 MHz,  $\text{CDCl}_3$ )  $\delta$  158.5, 157.7, 156.0, 155.5, 150.5, 148.9, 148.2, 142.2, 140.7, 140.3, 134.9, 133.7, 133.4, 133.4, 132.2, 131.7, 131.3, 130.5, 129.6, 129.5, 129.3, 129.3, 128.5, 128.0, 127.8, 127.7, 127.4, 122.6, 121.9, 121.1, 119.0, 118.8, 118.3, 115.5, 112.5, 111.9, 108.2, 67.1. HPLC: Chiralpak IA column, 80:20 hexanes/isopropanol, 1 ml/min,  $t_R = 10.4$  min (major), > 99% ee.  $[\alpha]_D^{25} = 772$  ( $c = 1.0$ ,  $\text{CHCl}_3$ ).  $m/z$  HRMS (ESI) found  $[\text{M}+\text{H}]^+ 828.0511$ ,  $\text{C}_{46}\text{H}_{28}\text{Br}_2\text{N}_3\text{O}_3^+$  requires 828.0492.

### Heterohelicene 5j

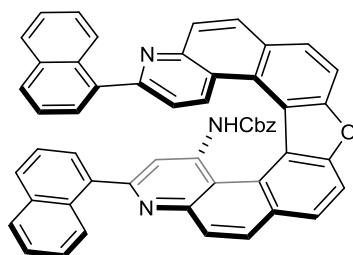

Starting from 0.1 mmol of **1a**, **5j** was afforded as a yellow solid (69 mg, 89% yield). Column chromatography eluent : petroleum ether : EtOAc = 4:1.

$^1\text{H}$  NMR (500 MHz,  $\text{CDCl}_3$ )  $\delta$  8.31 (d,  $J = 8.5$  Hz, 1H), 8.26 – 8.10 (m, 6H), 8.09 – 8.01 (m, 3H), 7.89 (s, 1H), 7.70 (d,  $J = 8.2$  Hz, 1H), 7.65 (t,  $J = 7.8$  Hz, 2H), 7.59 (d,  $J = 8.2$  Hz, 1H), 7.47 (d,  $J = 8.4$  Hz,



1H), 7.38 – 7.33 (m, 3H), 7.30 (ddd,  $J = 8.1, 6.7, 1.2$  Hz, 1H), 7.26 – 7.20 (m, 3H), 7.12 (dd,  $J = 8.2, 7.0$  Hz, 1H), 7.09 – 6.98 (m, 4H), 6.91 (dd,  $J = 8.2, 7.0$  Hz, 1H), 6.80 (d,  $J = 8.4$  Hz, 1H), 6.27 (s, 1H), 4.68 (d,  $J = 12.0$  Hz, 1H), 4.45 (d,  $J = 12.0$  Hz, 1H).  $^{13}\text{C}$  NMR (126 MHz,  $\text{CDCl}_3$ )  $\delta$  160.2, 159.2, 156.0, 155.6, 150.6, 148.9, 148.1, 142.8, 137.4, 137.0, 135.0, 134.5, 133.9, 133.8, 131.2, 130.8, 130.6, 130.3, 129.4, 129.2, 128.5, 128.5, 128.4, 128.4, 128.2, 128.1, 127.8, 127.6, 126.4, 126.1, 125.5, 125.4, 125.4, 124.7, 122.3, 121.2, 119.0, 118.8, 118.7, 115.4, 112.3, 111.8, 108.9, 67.0. HPLC: Chiralpak IA column, 80:20 hexanes/ isopropanol, 1 ml/min,  $t_R = 10.5$  min (major), > 99% ee.  $[\alpha]_D^{25} = 215$  ( $c = 1.0, \text{CHCl}_3$ ). HRMS (ESI) found  $[\text{M}+\text{H}]^+ 772.2593$ ,  $\text{C}_{54}\text{H}_{34}\text{N}_3\text{O}_3^+$  requires 772.2595.

### Heterohelicene **5k**

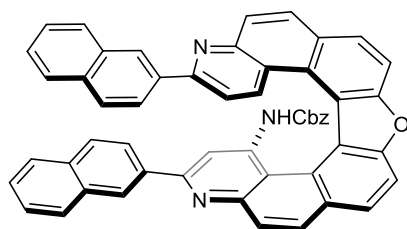

Starting from 0.1 mmol of **1a**, **5k** was afforded as a yellow solid (54 mg, 70% yield). Column chromatography eluent : petroleum ether : EtOAc = 5:1.

$^1\text{H}$  NMR (500 MHz,  $\text{CDCl}_3$ )  $\delta$  8.32 – 8.24 (m, 4H), 8.22 (s, 1H), 8.20 – 8.13 (m, 3H), 8.05 (s, 2H), 7.88 (d,  $J = 8.5$  Hz, 1H), 7.86 – 7.77 (m, 2H), 7.52 (d,  $J = 8.0$  Hz, 1H), 7.46 (d,  $J = 8.0$  Hz, 1H), 7.39 (d,  $J = 8.1$  Hz, 1H), 7.37 – 7.31 (m, 4H), 7.30 – 7.13 (m, 6H), 7.04 (t,  $J = 6.4$  Hz, 3H), 6.66 (d,  $J = 8.5$  Hz, 1H), 6.02 (s, 1H), 4.66 (d,  $J = 11.9$  Hz, 1H), 4.41 (d,  $J = 11.9$  Hz, 1H).  $^{13}\text{C}$  NMR (126 MHz,  $\text{CDCl}_3$ )  $\delta$  157.6, 156.6, 155.9, 155.6, 150.6, 148.2, 142.9, 135.3, 135.0, 134.3, 133.7, 133.4, 133.0, 132.9, 131.2, 130.2, 129.3, 129.0, 128.5, 128.5, 128.4, 128.2, 128.1, 127.8, 127.6, 127.2, 127.1, 126.8, 126.2, 126.0, 125.4, 124.4, 124.2, 122.4, 120.9, 118.8, 118.7, 115.6, 113.4, 112.1, 111.6, 104.2, 67.0. HPLC: Chiralpak IA column, 80:20 hexanes/ isopropanol, 1 ml/min,  $t_R = 11.3$  min (major), 14.2 min (minor), 94% ee.  $[\alpha]_D^{25} = 792$  ( $c = 0.5, \text{CHCl}_3$ ). HRMS (ESI) found  $[\text{M}+\text{H}]^+ 772.2591$ ,  $\text{C}_{54}\text{H}_{34}\text{N}_3\text{O}_3^+$  requires 772.2595.

### Heterohelicene **5l**

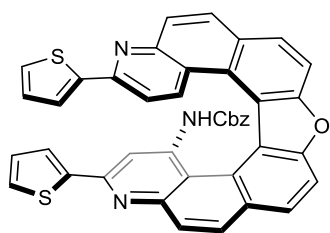

Starting from 0.1 mmol of **1a**, **5l** was afforded as a yellow solid (28.3 mg, 41% yield). Column chromatography eluent : petroleum ether : EtOAc = 5:1.

$^1\text{H}$  NMR (500 MHz,  $\text{CDCl}_3$ )  $\delta$  8.27 (d,  $J = 8.4$  Hz, 1H), 8.21 (d,  $J = 8.8$  Hz, 1H), 8.16 (d,  $J = 8.4$  Hz, 1H), 8.13 – 8.05 (m, 3H), 8.02 (s, 2H), 7.54 (s, 1H), 7.36 – 7.31 (m, 3H), 7.29 – 7.22 (m, 2H), 7.13 (s, 1H), 7.08 (dd,  $J = 3.8, 1.1$  Hz, 1H), 7.02 (s, 2H), 6.86 (d,  $J = 8.5$  Hz, 1H), 6.75 (dd,  $J = 5.0, 3.6$  Hz, 1H), 6.70 (dd,  $J = 5.0, 3.6$  Hz, 1H), 6.42 (d,  $J = 8.6$  Hz, 1H), 5.92 (s, 1H), 4.59 (d,  $J = 11.9$  Hz, 1H), 4.37 (d,  $J = 11.9$  Hz, 1H).  $^{13}\text{C}$  NMR (126 MHz,  $\text{CDCl}_3$ )  $\delta$  155.9, 155.6, 152.4, 150.4, 144.6, 142.4, 134.0, 131.1, 130.3, 129.1, 129.0, 128.5, 128.1, 128.0, 127.8, 127.6, 127.1, 126.8, 125.9, 125.5, 122.2, 118.5, 112.1, 111.9, 111.4, 107.3, 102.4, 67.0. Chiralpak IA column, 80:20 hexanes/ isopropanol, 1 ml/min,  $t_R = 11.7$  min (major), > 99% ee.  $[\alpha]_D^{25} = 870$  ( $c = 0.2, \text{CHCl}_3$ ). HRMS (ESI) found  $[\text{M}+\text{H}]^+$  684.1401,  $\text{C}_{42}\text{H}_{26}\text{N}_3\text{O}_3\text{S}_2^+$  requires 684.1410.

### Enantioselective synthesis of heterohelicenes **6**

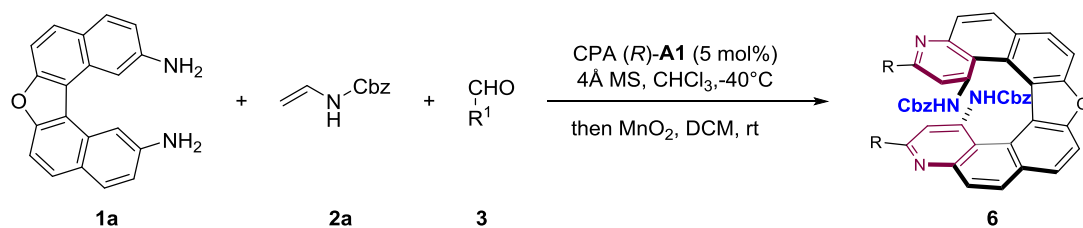

Diamine **1a** (0.1 mmol), CPA (*R*)-**A1** (0.005 mmol, 5 mol%) and activated 4Å molecular sieves (ca. 50 mg) were placed in a reaction tube and chloroform (1.5 mL) was added into this reaction mixture via syringe, which was followed by adding the corresponding aldehyde **3** (0.4 mmol, 4.0 equiv.). After stirring at rt for about 0.5 h., this reaction mixture was cooled to  $-40\text{ }^\circ\text{C}$ , and a solution of enamide **2a** (0.4 mmol, 4.0 equiv.) in  $\text{CHCl}_3$  (0.5 mL) was added slowly into the reaction mixture via syringe and the mixture was stirred at the same temperature for additional 12 h ~ 24 h. After the completion of the cycloaddition step as monitored by TLC analysis, the mixture was concentrated under vacuum to give a residue. The residue was then dissolved in DCM (10 mL), and added  $\text{MnO}_2$

(10 mmol, 100 equiv.) at rt. After stirring for 48 h, the mixture was filtered through Celite and concentrated under vacuum to give a residue, which was purified by column chromatography on silica gel using petroleum ether/ethyl acetate or dichloromethane as eluent to afford the corresponding product **6**.

### Heterohelicene **6a**

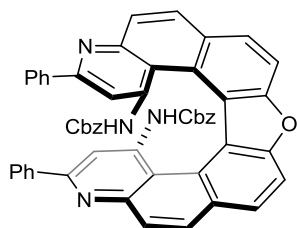

Starting from 0.1 mmol of **1a**, **6a** was afforded as a light yellow solid (61.6 mg, 75% yield). Column chromatography eluent : petroleum ether : EtOAc = 5:1.

$^1\text{H}$  NMR (500 MHz,  $\text{CDCl}_3$ )  $\delta$  8.13 (d,  $J = 8.7$  Hz, 1H), 8.00 (s, 2H), 7.91 (d,  $J = 8.8$  Hz, 1H), 7.86 (d,  $J = 7.5$  Hz, 2H), 7.68 (s, 1H), 7.35 (q,  $J = 4.4$  Hz, 3H), 7.17 (t,  $J = 7.3$  Hz, 1H), 7.07 (q,  $J = 7.5$  Hz, 4H), 5.69 (s, 1H), 4.61 (d,  $J = 11.9$  Hz, 1H), 4.44 (d,  $J = 11.9$  Hz, 1H).  $^{13}\text{C}$  NMR (126 MHz,  $\text{CDCl}_3$ )  $\delta$  157.6, 154.9, 150.2, 149.7, 142.0, 137.9, 135.0, 129.7, 129.3, 129.1, 128.8, 128.6, 128.5, 128.4, 128.2, 128.2, 128.0, 127.5, 127.4, 122.1, 118.9, 113.9, 111.2, 103.3, 66.9. HPLC: Chiralpak IA column, 80:20 hexanes/ isopropanol, 1 ml/min,  $t_R = 10.7$  min (major), 16.4 min (minor), 99% ee.  $[\alpha]_D^{25} = 900$  ( $c = 1.0$ ,  $\text{CHCl}_3$ ).  $m/z$  HRMS (ESI) found  $[\text{M}+\text{H}]^+ 821.2755$ ,  $\text{C}_{54}\text{H}_{37}\text{N}_4\text{O}_5^+$  requires 821.2758.

### Heterohelicene **6b**

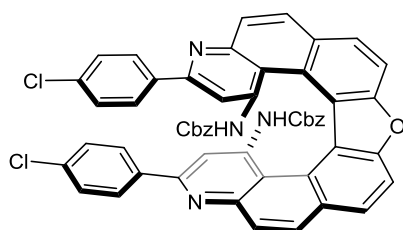

Starting from 0.125 mmol of **1a**, **6b** was afforded as a yellow solid (77 mg, 69% yield). Column chromatography eluent : petroleum ether : EtOAc = 5:1.

$^1\text{H}$  NMR (500 MHz,  $\text{CDCl}_3$ )  $\delta$  8.15 (d,  $J = 8.7$  Hz, 1H), 8.12 – 8.05 (m, 3H), 7.99 (d,  $J = 8.8$  Hz, 1H), 7.67 (s, 1H), 7.57 (s, 1H), 7.39 – 7.34 (m, 3H), 7.17 (dd,  $J = 7.8, 2.1$  Hz, 1H), 7.03 (dd,  $J = 17.5, 9.7$  Hz, 3H), 5.71 (s, 1H), 4.64 (d,  $J = 11.8$  Hz, 1H), 4.46 (d,  $J = 11.9$  Hz, 1H).  $^{13}\text{C}$  NMR (126 MHz,

CDCl<sub>3</sub>\_new)  $\delta$  160.4, 155.6, 155.0, 150.3, 149.6, 142.1, 139.6, 134.9, 134.5, 130.0, 129.4, 129.3, 129.0, 128.6, 128.5, 128.5, 127.0, 125.2, 121.9, 118.8, 114.1, 111.5, 102.5, 67.0. HPLC: Chiralpak IA column, 80:20 hexanes/ isopropanol, 1 ml/min,  $t_R$  = 11.8 min (major), > 99% ee.  $[\alpha]_D^{25}$  = 703 (c = 0.5, CHCl<sub>3</sub>). m/z HRMS (ESI) found  $[M+H]^+$  889.1979, C<sub>54</sub>H<sub>35</sub>Cl<sub>2</sub>N<sub>4</sub>O<sub>5</sub><sup>+</sup> requires 889.1979.

### Heterohelicene 6c

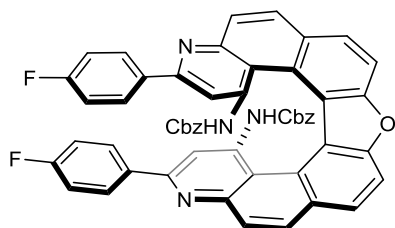

Starting from 0.1 mmol of **1a**, **6c** was afforded as a yellow solid (60 mg, 70% yield). Column chromatography eluent : petroleum ether : EtOAc = 4:1.

<sup>1</sup>H NMR (500 MHz, CDCl<sub>3</sub>)  $\delta$  8.14 – 8.03 (m, 3H), 7.96 (d,  $J$  = 8.8 Hz, 1H), 7.84 (t,  $J$  = 6.8 Hz, 2H), 7.61 (s, 1H), 7.37 – 7.30 (m, 3H), 7.05 (s, 2H), 6.83 – 6.75 (m, 2H), 5.71 (s, 1H), 4.62 (d,  $J$  = 11.9 Hz, 1H), 4.44 (d,  $J$  = 11.9 Hz, 1H). <sup>13</sup>C NMR (126 MHz, CDCl<sub>3</sub>)  $\delta$  164.9, 162.9, 156.3, 155.0, 150.3, 149.7, 142.0, 134.9, 134.1, 129.8, 129.3, 129.2, 129.2, 128.9, 128.8, 128.6, 128.5, 122.0, 118.8, 115.0, 114.8, 113.8, 111.3, 102.6, 66.9. <sup>19</sup>F NMR (471 MHz, CDCl<sub>3</sub>)  $\delta$  -112.95. m/z. HPLC: Chiralpak IA column, 70:30 hexanes/ isopropanol, 1 ml/min,  $t_R$  = 9.3 min (major), > 99% ee.  $[\alpha]_D^{25}$  = 757 (c = 1.0, CHCl<sub>3</sub>). HRMS (ESI) found  $[M+H]^+$  857.2567, C<sub>54</sub>H<sub>35</sub>F<sub>2</sub>N<sub>4</sub>O<sub>5</sub><sup>+</sup> requires 857.2570.

### Heterohelicene 6d

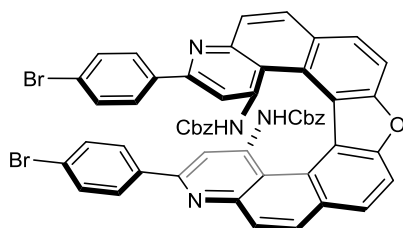

Starting from 0.1 mmol of **1a**, **6d** was afforded as a yellow solid (75 mg, 77% yield). Column chromatography eluent : petroleum ether : EtOAc = 4:1.

<sup>1</sup>H NMR (500 MHz, CDCl<sub>3</sub>)  $\delta$  8.12 – 8.02 (m, 3H), 7.96 (d,  $J$  = 8.8 Hz, 1H), 7.70 (d,  $J$  = 8.2 Hz, 2H), 7.60 (s, 1H), 7.39 – 7.31 (m, 3H), 7.28 – 7.19 (m, 2H), 7.04 (d,  $J$  = 6.8 Hz, 2H), 5.67 (d,  $J$  = 9.0 Hz, 1H), 4.61 (d,  $J$  = 11.9 Hz, 1H), 4.44 (d,  $J$  = 11.7 Hz, 1H). <sup>13</sup>C NMR (126 MHz, CDCl<sub>3</sub>)  $\delta$  156.1, 155.0, 150.2, 149.7, 142.0, 136.8, 134.9, 131.1, 129.9, 129.3, 128.9, 128.8, 128.6, 128.5, 128.5, 124.2, 121.9,

118.8, 114.0, 111.4, 102.4, 66.9. HPLC: Chiralpak IA column, 70:30 hexanes/ isopropanol, 1 ml/min,  $t_R = 11.5$  min (major), > 99% ee.  $[\alpha]_D^{25} = 1253$  ( $c = 0.5$ ,  $\text{CHCl}_3$ ). HRMS (ESI) found  $[\text{M}+\text{H}]^+ 977.0994$ ,  $\text{C}_{54}\text{H}_{35}\text{Br}_2\text{N}_4\text{O}_5^+$  requires 977.0969.

### Heterohelicene 6e

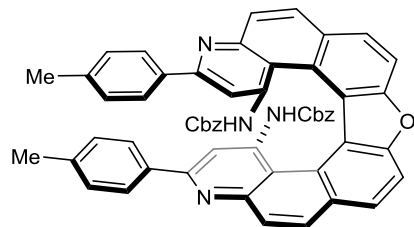

Starting from 0.1 mmol of **1a**, **6e** was afforded as a yellow solid (70.8 mg, 83% yield). Column chromatography eluent : petroleum ether : EtOAc = 4 : 1.

$^1\text{H}$  NMR (400 MHz,  $\text{CDCl}_3$ )  $\delta$  8.14 (d,  $J = 8.8$  Hz, 1H), 8.05 (s, 2H), 7.96 (d,  $J = 8.8$  Hz, 1H), 7.74 (d,  $J = 7.8$  Hz, 2H), 7.66 (s, 1H), 7.39 – 7.29 (m, 3H), 7.05 (s, 2H), 6.86 (d,  $J = 7.9$  Hz, 2H), 5.72 (s, 1H), 4.63 (d,  $J = 12.0$  Hz, 1H), 4.44 (d,  $J = 12.0$  Hz, 1H), 2.32 (s, 3H).  $^{13}\text{C}$  NMR (126 MHz,  $\text{CDCl}_3$ \_new)  $\delta$  157.7, 154.9, 150.3, 149.7, 141.9, 138.9, 135.2, 135.1, 129.6, 129.2, 128.9, 128.8, 128.7, 128.5, 128.4, 128.4, 127.3, 122.2, 118.9, 113.9, 111.1, 102.8, 66.8, 21.4. Chiralpak IA column, 70:30 hexanes/ isopropanol, 1 ml/min,  $t_R = 8.3$  min (major), 15.5 min (minor), 98% ee.  $[\alpha]_D^{25} = 876$  ( $c = 1.0$ ,  $\text{CHCl}_3$ ). HRMS (ESI) found  $[\text{M}+\text{H}]^+ 849.3084$ ,  $\text{C}_{56}\text{H}_{41}\text{N}_4\text{O}_5^+$  requires 849.3071.

### Heterohelicene 6f

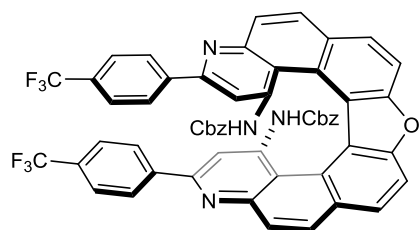

Starting from 0.1 mmol of **1a**, **5f** was afforded as a yellow solid (62 mg, 65% yield). Column chromatography eluent : petroleum ether : EtOAc = 4 : 1.

$^1\text{H}$  NMR (400 MHz,  $\text{CDCl}_3$ )  $\delta$  8.20 – 8.05 (m, 3H), 8.00 (d,  $J = 8.8$  Hz, 1H), 7.95 (d,  $J = 8.0$  Hz, 2H), 7.71 (s, 1H), 7.36 (dd,  $J = 5.0, 1.9$  Hz, 3H), 7.31 (d,  $J = 8.1$  Hz, 2H), 7.08 – 7.02 (m, 2H), 5.72 (s, 1H), 4.63 (d,  $J = 11.9$  Hz, 1H), 4.46 (d,  $J = 12.0$  Hz, 1H).  $^{13}\text{C}$  NMR (126 MHz,  $\text{CDCl}_3$ )  $\delta$  155.7, 155.0, 150.2, 149.8, 142.2, 141.2, 134.8, 130.0, 129.4, 129.0, 128.9, 128.6, 128.6, 128.5, 127.5, 124.8, 121.9, 118.9, 114.2, 111.7, 103.1, 67.0.  $^{19}\text{F}$  NMR (471 MHz,  $\text{CDCl}_3$ )  $\delta$  -62.89. Chiralpak IA column, 70:30 hexanes/

ethanol, 1 ml/min,  $t_R = 10.0$  min (major), > 99% ee.  $[\alpha]_D^{25} = 727.2$  ( $c = 0.5$ ,  $\text{CHCl}_3$ ). HRMS (ESI) found  $[\text{M}+\text{H}]^+ 957.2535$ ,  $\text{C}_{56}\text{H}_{35}\text{F}_6\text{N}_4\text{O}_5^+$  requires 957.2506.

### Heterohelicene 6g

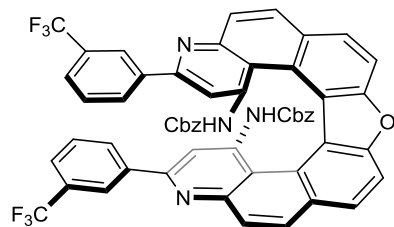

Starting from 0.1 mmol of **1a**, **6g** was afforded as a yellow solid (67 mg, 70% yield). Column chromatography eluent : petroleum ether : EtOAc = 5 : 1.

$^1\text{H}$  NMR (500 MHz,  $\text{CDCl}_3$ )  $\delta$  8.61 (s, 1H), 8.16 (d,  $J = 8.8$  Hz, 1H), 8.12 – 8.05 (m, 2H), 8.00 (d,  $J = 8.8$  Hz, 1H), 7.69 (s, 1H), 7.62 (s, 1H), 7.40 (d,  $J = 7.7$  Hz, 1H), 7.38 – 7.32 (m, 3H), 7.06 (s, 2H), 7.00 (t,  $J = 7.8$  Hz, 1H), 5.71 (s, 1H), 4.64 (d,  $J = 11.8$  Hz, 1H), 4.46 (d,  $J = 11.9$  Hz, 1H).  $^{13}\text{C}$  NMR (126 MHz,  $\text{CDCl}_3$ \_new)  $\delta$  155.2, 155.0, 150.3, 149.7, 142.1, 138.6, 134.8, 130.9, 130.7, 130.4, 130.2, 130.0, 129.4, 129.0, 128.9, 128.6, 128.5, 125.7, 125.4, 123.8, 123.2, 121.8, 118.8, 114.2, 111.6, 102.5, 67.0.  $^{19}\text{F}$  NMR (471 MHz,  $\text{CDCl}_3$ )  $\delta$  -62.31. HPLC: Chiralpak IA column, 80:20 hexanes/ ethanol, 1 ml/min,  $t_R = 9.4$  min (major), 10.8 min (minor), 99% ee.  $[\alpha]_D^{25} = 682$  ( $c = 1.0$ ,  $\text{CHCl}_3$ ). HRMS (ESI) found  $[\text{M}+\text{H}]^+ 957.2530$ ,  $\text{C}_{56}\text{H}_{35}\text{F}_6\text{N}_4\text{O}_5^+$  requires 957.2506.

### Heterohelicene 6h

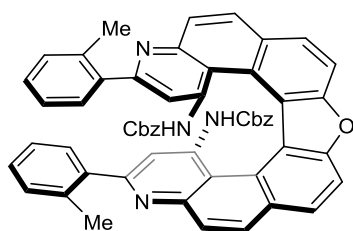

Starting from 0.1 mmol of **1a**, **6h** was afforded as a yellow solid (61.3 mg, 72% yield). Column chromatography eluent : petroleum ether : EtOAc = 4 : 1.

$^1\text{H}$  NMR (500 MHz,  $\text{CDCl}_3$ )  $\delta$  8.10 – 8.01 (m, 3H), 7.96 (d,  $J = 8.8$  Hz, 1H), 7.77 (s, 1H), 7.35 (dp,  $J = 6.0, 2.0$  Hz, 3H), 7.21 (t,  $J = 7.3$  Hz, 2H), 7.02 (dq,  $J = 10.4, 3.1$  Hz, 4H), 5.97 (s, 1H), 4.68 (s, 1H), 4.49 (d,  $J = 12.0$  Hz, 1H), 2.09 (s, 3H).  $^{13}\text{C}$  NMR (126 MHz,  $\text{CDCl}_3$ )  $\delta$  160.5, 155.0, 150.3, 149.6, 141.6, 139.2, 136.9, 134.9, 131.4, 130.1, 129.9, 129.5, 129.0, 128.6, 128.5, 128.4, 128.4, 128.1, 125.6,

122.6, 119.1, 113.2, 111.4, 106.9, 66.9, 20.4. HPLC: Chiralpak IA column, 70:30 hexanes/ isopropanol, 1 ml/min,  $t_R = 6.5$  min (major), > 99% ee.  $[\alpha]_D^{25} = 402$  ( $c = 1.0$ ,  $\text{CHCl}_3$ ). HRMS (ESI) found  $[\text{M}+\text{H}]^+$  849.3093,  $\text{C}_{56}\text{H}_{41}\text{N}_4\text{O}_5^+$  requires 849.3071.

### Heterohelicene **6i**

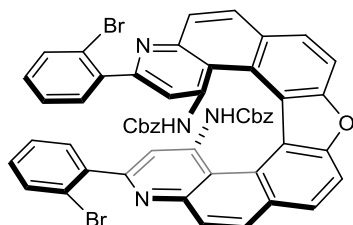

Starting from 0.1 mmol of **1a**, **6i** was afforded as a yellow solid (62 mg, 51% yield). Column chromatography eluent : petroleum ether : EtOAc = 3 : 1.

$^1\text{H}$  NMR (500 MHz,  $\text{CDCl}_3$ )  $\delta$  8.13 – 8.00 (m, 4H), 7.96 (d,  $J = 8.8$  Hz, 1H), 7.50 (dd,  $J = 8.1, 1.2$  Hz, 1H), 7.40 – 7.30 (m, 3H), 7.28 – 7.22 (m, 1H), 7.11 (td,  $J = 7.7, 1.7$  Hz, 1H), 7.06 – 6.99 (m, 2H), 6.95 (td,  $J = 7.5, 1.2$  Hz, 1H), 5.96 (s, 1H), 4.64 (d,  $J = 12.0$  Hz, 1H), 4.51 (d,  $J = 12.0$  Hz, 1H).  $^{13}\text{C}$  NMR (126 MHz,  $\text{CDCl}_3$ )  $\delta$  158.2, 155.0, 150.2, 149.8, 141.3, 140.3, 134.9, 133.6, 132.1, 130.2, 129.7, 129.4, 129.2, 128.7, 128.5, 128.5, 127.4, 122.4, 121.8, 119.2, 113.8, 111.6, 107.0, 67.0. HPLC: Chiralpak IA column, 80:20 hexanes/ isopropanol, 1 ml/min,  $t_R = 9.3$  min (major), > 99% ee.  $[\alpha]_D^{25} = 517$  ( $c = 1.0$ ,  $\text{CHCl}_3$ ).  $m/z$  HRMS (ESI) found  $[\text{M}+\text{H}]^+$  977.0994,  $\text{C}_{54}\text{H}_{35}\text{Br}_2\text{N}_4\text{O}_5^+$  requires 977.0969.

### Heterohelicene **6j**

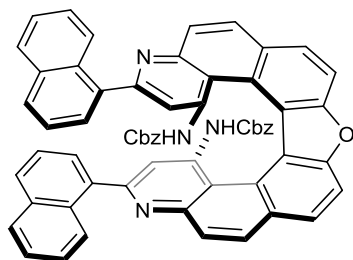

Starting from 0.1 mmol of **1a**, **6j** was afforded as a yellow solid (47 mg, 51% yield). Column chromatography eluent : petroleum ether : EtOAc = 4 : 1.

$^1\text{H}$  NMR (500 MHz,  $\text{CDCl}_3$ )  $\delta$  8.15 – 8.03 (m, 5H), 7.98 (d,  $J = 8.8$  Hz, 1H), 7.53 (d,  $J = 8.2$  Hz, 1H), 7.46 (d,  $J = 8.1$  Hz, 1H), 7.41 – 7.32 (m, 3H), 7.27 – 7.22 (m, 1H), 7.17 (ddd,  $J = 8.1, 6.6, 1.1$  Hz, 1H), 7.06 (p,  $J = 3.2$  Hz, 2H), 6.99 – 6.90 (m, 2H), 6.07 (s, 1H), 4.71 (d,  $J = 12.0$  Hz, 1H), 4.53 (d,  $J = 12.0$

Hz, 1H).  $^{13}\text{C}$  NMR (126 MHz,  $\text{CDCl}_3$ )  $\delta$  160.0, 155.1, 150.4, 149.8, 142.1, 137.2, 135.0, 133.6, 130.3, 130.0, 129.6, 129.2, 129.1, 128.5, 128.5, 128.4, 128.2, 127.5, 126.1, 125.4, 125.2, 124.4, 122.6, 119.2, 113.5, 111.5, 107.6, 66.9. HPLC: Chiralpak IA column, 70:30 hexanes/ isopropanol, 1 ml/min,  $t_{\text{R}} = 8.9$  min (major), > 99% ee.  $[\alpha]_{\text{D}}^{25} = 253$  ( $c = 1.0$ ,  $\text{CHCl}_3$ ). HRMS (ESI) found  $[\text{M}+\text{H}]^+ 921.3093$ ,  $\text{C}_{62}\text{H}_{41}\text{N}_4\text{O}_5^+$  requires 921.3071.

### Heterohelicene **6k**

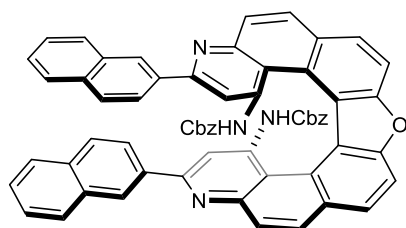

Starting from 0.1 mmol of **1a**, **6k** was afforded as a yellow solid (51 mg, 55% yield). Column chromatography eluent : petroleum ether : EtOAc = 5 : 1.

$^1\text{H}$  NMR (500 MHz,  $\text{CDCl}_3$ )  $\delta$  8.31 (d,  $J = 1.8$  Hz, 1H), 8.23 (d,  $J = 8.8$  Hz, 1H), 8.10 (s, 2H), 8.04 (d,  $J = 8.8$  Hz, 1H), 7.88 (d,  $J = 8.5$  Hz, 2H), 7.57 – 7.52 (m, 1H), 7.39 – 7.33 (m, 3H), 7.29 – 7.26 (m, 1H), 7.25 – 7.17 (m, 2H), 7.06 (d,  $J = 8.5$  Hz, 3H), 5.79 (s, 1H), 4.69 (d,  $J = 11.9$  Hz, 1H), 4.48 (d,  $J = 11.9$  Hz, 1H).  $^{13}\text{C}$  NMR (126 MHz,  $\text{CDCl}_3$ )  $\delta$  157.4, 155.0, 150.4, 149.9, 141.9, 135.2, 135.0, 133.6, 132.8, 129.8, 129.3, 129.0, 128.6, 128.5, 128.5, 128.1, 127.4, 127.1, 126.9, 126.0, 125.2, 124.3, 122.2, 118.9, 114.0, 111.2, 102.9, 66.9. HPLC: Chiralpak IA column, 70:30 hexanes/ isopropanol, 1 ml/min,  $t_{\text{R}} = 12.1$  min (major), 19.9 min (minor), 93% ee.  $[\alpha]_{\text{D}}^{25} = 386$  ( $c = 0.5$ ,  $\text{CHCl}_3$ ). HRMS (ESI) found  $[\text{M}+\text{H}]^+ 921.3090$ ,  $\text{C}_{62}\text{H}_{41}\text{N}_4\text{O}_5^+$  requires 921.3071.

### Heterohelicene **6l**

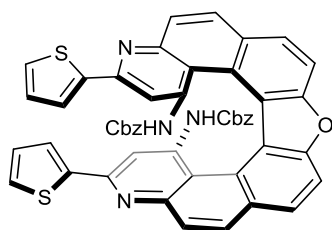

Starting from 0.1 mmol of **1a**, **6l** was afforded as a yellow solid (29 mg, 35% yield). Column chromatography eluent : petroleum ether : EtOAc = 4 : 1.



$^1\text{H}$  NMR (400 MHz,  $\text{CDCl}_3$ )  $\delta$  8.10 – 8.01 (m, 3H), 7.96 (d,  $J = 8.9$  Hz, 1H), 7.58 (s, 1H), 7.35 (p,  $J = 3.2$  Hz, 3H), 7.23 (dd,  $J = 5.0, 1.1$  Hz, 1H), 7.18 – 7.13 (m, 1H), 7.04 (s, 2H), 6.68 (dd,  $J = 5.0, 3.7$  Hz, 1H), 5.70 (s, 1H), 4.61 (d,  $J = 12.0$  Hz, 1H), 4.43 (d,  $J = 12.0$  Hz, 1H).  $^{13}\text{C}$  NMR (126 MHz,  $\text{CDCl}_3$ )  $\delta$  155.0, 153.3, 150.2, 149.5, 144.6, 141.6, 135.0, 129.9, 129.3, 128.8, 128.5, 128.4, 128.1, 127.8, 126.5, 122.0, 118.7, 114.0, 111.1, 101.5, 66.9. Chiralpak IA column, 70:30 hexanes/ isopropanol, 1 ml/min,  $t_R = 13.2$  min (major),  $> 99\%$  ee.  $[\alpha]_D^{25} = 751$  ( $c = 0.5, \text{CHCl}_3$ ). HRMS (ESI) found  $[\text{M}+\text{H}]^+ 833.1909$ ,  $\text{C}_{50}\text{H}_{33}\text{N}_4\text{O}_5\text{S}_2^+$  requires 833.1887.

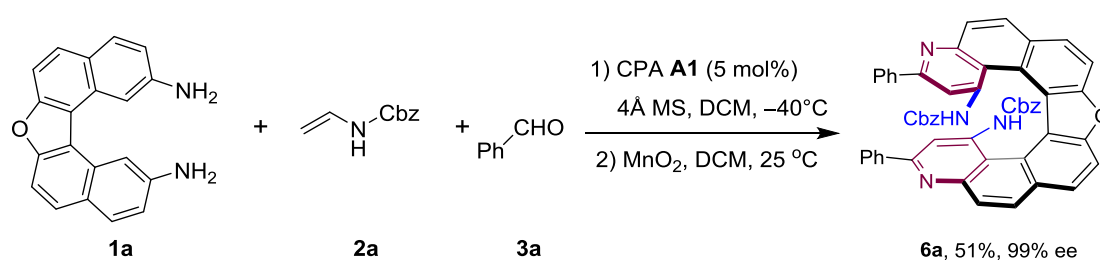

**Scheme S2.** One-pot asymmetric synthesis of azahelicene **6a** via sequential bis-Povarov reaction and oxidative aromatization.

### Thermal racemization study of helicene product **5a** and **6a**

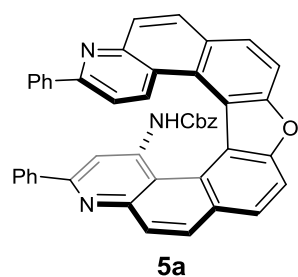

Thermal racemization of **5a** at  $150^\circ\text{C}$  (in mesitylene)

| Time/s | ee (%) of <b>5a</b> |
|--------|---------------------|
| 0      | 99.2                |
| 1800   | 99.3                |
| 3600   | 99.5                |
| 7200   | 99.0                |
| 21600  | 98.7                |
| 43200  | 99.2                |
| 86400  | 99.0                |
| 172800 | 99.5                |

|        |      |
|--------|------|
| 259200 | 98.6 |
| 432000 | 98.9 |

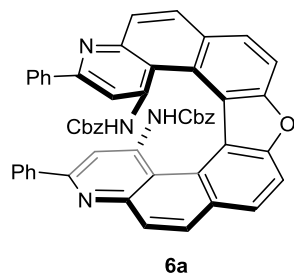

Thermal racemization of **6a** at 150°C (in mesitylene)

| Time/s | ee (%) of <b>6a</b> |
|--------|---------------------|
| 0      | 98.5                |
| 1800   | 98.4                |
| 3600   | 98.7                |
| 7200   | 98.5                |
| 21600  | 98.4                |
| 43200  | 98.5                |
| 86400  | 98.3                |
| 172800 | 98.6                |
| 259200 | 98.1                |
| 432000 | 98.2                |

### Large-scale asymmetric synthesis of **5a** and **6a**

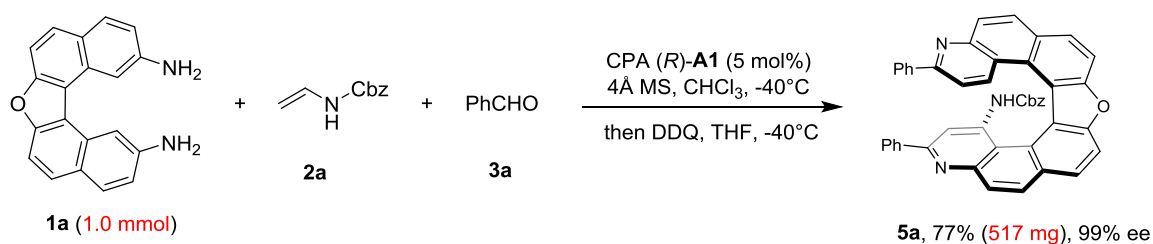

Diamine **1a** (1 mmol), CPA (*R*)-**A9** (0.05 mmol, 5 mol%) and activated 4Å molecular sieves (ca. 500 mg) were placed in a reaction tube and CHCl<sub>3</sub> (15 mL) was added into this reaction mixture via syringe, which was followed by adding benzaldehyde **3a** (4 mmol, 4.0 equiv.) at rt. After stirring at rt for about 0.5 h, the reaction mixture was cooled to -40 °C, and a solution of enamide **2** (4 mmol, 4.0 equiv.) in CHCl<sub>3</sub> (5 mL) was added slowly into the reaction mixture via syringe. After stirring at the same temperature for additional 24 h, the mixture was concentrated under vacuum to give a residue. The residue was dissolved in THF (15 mL) and then cooled to -40 °C. Then a solution of

1,2-dichloro-4,5-dicyanobenzoquinone (DDQ, 6 mmol, 6.0 equiv.) in THF (5 mL) was added and the mixture was allowed to stir at  $-40\text{ }^{\circ}\text{C}$  for another 24 h. After that, this mixture was warmed to room temperature and washed with saturated aqueous  $\text{NaHCO}_3$  and extracted with EtOAc for 3 times. The combine organic layers were then, dried over  $\text{Na}_2\text{SO}_4$  and concentrated under vacuum to give a residue, which was purified by column chromatography on silica gel (petroleum ether/ethyl acetate = 5/1) to afford the (*P*)-**5a** as a yellow solid (517 mg, 77% yield, 99% ee).

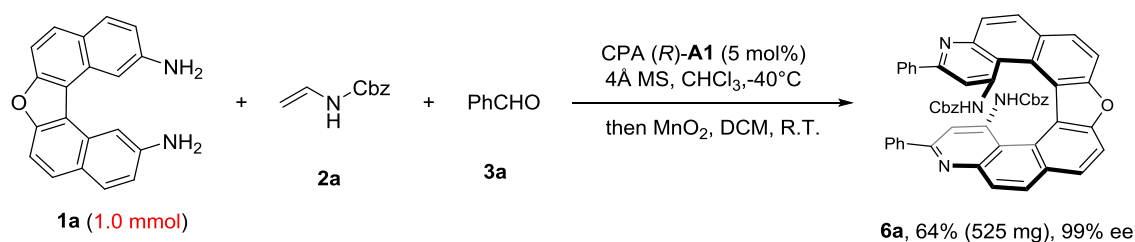

Diamine **1a** (1 mmol), CPA (*R*)-**A9** (0.05 mmol, 5 mol%) and activated  $4\text{\AA}$  molecular sieves (ca. 500 mg) were placed in a reaction tube and  $\text{CHCl}_3$  (15 mL) was added into this reaction mixture via syringe, which was followed by adding benzaldehyde **3a** (4 mmol, 4.0 equiv.) at rt. After stirring at rt for about 0.5 h, the reaction mixture was cooled to  $-40\text{ }^{\circ}\text{C}$ , and a solution of enamide **2a** (4 mmol, 4.0 equiv.) in  $\text{CHCl}_3$  (5 mL) was added slowly into the reaction mixture via syringe. After stirring at the same temperature for additional 24 h, the mixture was concentrated under vacuum to give a residue. The residue was dissolved in DCM (50 mL), and added  $\text{MnO}_2$  (100 mmol, 100 equiv.) at rt. After stirring for another 48 h at rt, the mixture was filtered through Celite and concentrated under vacuum to give a residue, which was purified by column chromatography on silica gel (petroleum ether/ethyl acetate = 4/1) to afford the (*P*)-**6a** as a yellow solid (525 mg, 64% yield, 99% ee).

### Derivatizations of the chiral azahelicene products

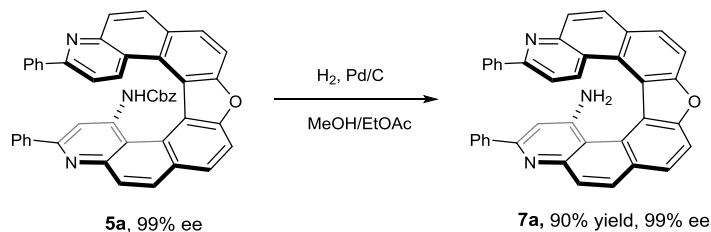

To a solution of **5a** (50 mg, 0.0745 mmol) in MeOH/EtOAc (5 mL/1 mL) was added Pd/C (ca. 10 mg, 10% Pd, 55 wt% H<sub>2</sub>O) at rt. After stirring under H<sub>2</sub> atmosphere (1.0 atm, balloon) for 18 h at rt, the mixture was filtered through Celite. The filtrate was concentrated under vacuum to give a residue, which was purified by column chromatography on silica gel using petroleum ether/ethyl acetate = 3:1 as eluent to afford **7a** as a yellow solid (36 mg, 90% yield, 99% ee). <sup>1</sup>H NMR (500 MHz, CDCl<sub>3</sub>) δ 8.26 – 8.06 (m, 8H), 7.73 (d, *J* = 7.6 Hz, 2H), 7.65 (d, *J* = 7.5 Hz, 2H), 7.21 (t, *J* = 7.3 Hz, 1H), 7.18 – 7.03 (m, 6H), 6.61 (d, *J* = 8.4 Hz, 1H), 5.89 (s, 1H), 3.45 (s, 2H). <sup>13</sup>C NMR (126 MHz, CDCl<sub>3</sub>) δ 157.0, 155.9, 155.3, 151.3, 147.5, 138.5, 134.6, 130.9, 130.8, 128.9, 128.8, 128.6, 128.3, 128.2, 127.6, 127.4, 127.4, 127.3, 123.5, 122.6, 119.0, 118.3, 114.6, 113.9, 111.4, 110.9, 101.1. Chiralpak IA column, 70:30 hexanes/ isopropanol, 1 ml/min, *t<sub>R</sub>* = 5.7 min (major), 9.8 min (minor), 99% ee. [ $\alpha$ ]<sub>D</sub><sup>25</sup> = 1396 (c = 1.0, CHCl<sub>3</sub>). HRMS (ESI) found [M+H]<sup>+</sup> 538.1918, C<sub>38</sub>H<sub>24</sub>N<sub>3</sub>O<sup>+</sup> requires 538.1914.

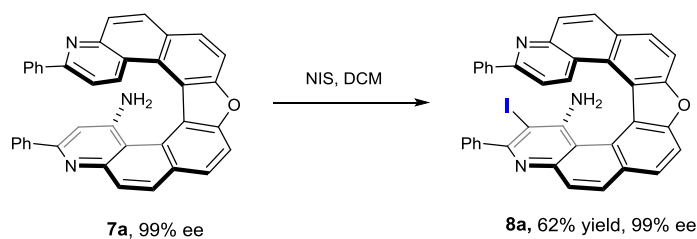

To a solution of **7a** (97 mg, 0.18 mmol) in DCM (10 mL) was added NIS (45 mg, 0.2 mmol, 1.1 equiv.) at rt. After stirring at rt for 15 h, the mixture was concentrated under vacuum to give a residue, which was purified by column chromatography on silica gel using dichloromethane/ethyl acetate = 50/1 as eluent to afford **8a** as a brown solid (74 mg, 62% yield, 99% ee). <sup>1</sup>H NMR (500 MHz, CDCl<sub>3</sub>) δ 8.27 – 8.16 (m, 5H), 8.11 (d, *J* = 8.4 Hz, 1H), 8.07 (td, *J* = 5.4, 3.1 Hz, 4H), 7.47 – 7.37 (m, 3H), 7.23 – 7.14 (m, 4H), 7.01 (dd, *J* = 8.5, 6.7 Hz, 2H), 6.80 (d, *J* = 8.5 Hz, 1H), 4.26 (s, 2H). <sup>13</sup>C NMR (126 MHz, CDCl<sub>3</sub>) δ 161.5, 156.6, 156.1, 155.3, 150.5, 148.5, 147.6, 142.2, 138.9, 134.6, 131.3, 131.0, 129.5, 129.4, 128.9, 128.8, 128.2, 127.8, 127.7, 127.5, 127.3, 123.2, 122.1, 118.7, 118.3, 113.8, 113.0, 111.5. Chiralpak IA column, 70:30 hexanes/ isopropanol, 1 ml/min, *t<sub>R</sub>* = 8.3 min (major), 9.7 min (minor), 99% ee. [ $\alpha$ ]<sub>D</sub><sup>25</sup> = 1601 (c = 1.0, CHCl<sub>3</sub>). HRMS (ESI) found [M+H]<sup>+</sup> 664.0881, C<sub>38</sub>H<sub>23</sub>IN<sub>3</sub>O<sup>+</sup> requires 664.0880.

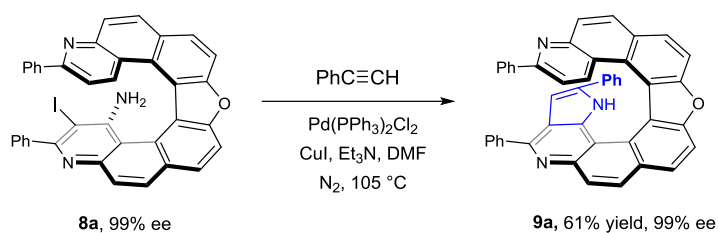

Under  $\text{N}_2$  atmosphere, **8a** (20 mg, 0.03 mmol), phenylacetylene (8  $\mu\text{L}$ , 0.075 mmol, 2.5 equiv.),  $\text{Pd}(\text{PPh}_3)_2\text{Cl}_2$  (4.2 mg, 20 mol%),  $\text{CuI}$  (2.3 mg, 40 mol%) and  $\text{Et}_3\text{N}$  (12.5  $\mu\text{L}$ , 0.09 mmol, 3.0 equiv.) were dissolved in  $\text{DMF}$  (1 mL), and the mixture was placed into  $105\text{ }^\circ\text{C}$  oil bath and was allowed to stirred for 12 h. After the completion of this reaction, the mixture was cooled to rt and diluted with  $\text{EtOAc}$ , washed by brine, dried over  $\text{Na}_2\text{SO}_4$  and concentrated under vacuum to give a residue, which was purified by column chromatography on silica gel using petroleum ether/ethyl acetate = 3/1 as eluent to afford **9a** as a yellow solid (12 mg, 61% yield, 99% ee).  $^1\text{H}$  NMR (500 MHz,  $\text{CDCl}_3$ )  $\delta$  8.46 (s, 1H), 8.36 (d,  $J = 8.5$  Hz, 1H), 8.32 – 8.19 (m, 4H), 7.85 – 7.71 (m, 8H), 7.50 (s, 1H), 7.32 (t,  $J = 7.3$  Hz, 1H), 7.30 – 7.26 (m, 1H), 7.22 (dt,  $J = 11.8, 7.8$  Hz, 5H), 7.17 – 7.06 (m, 3H), 6.54 – 6.48 (m, 2H), 6.45 – 6.39 (m, 2H).  $^{13}\text{C}$  NMR (126 MHz,  $\text{CDCl}_3$ )  $\delta$  156.8, 156.6, 155.7, 147.5, 138.6, 136.7, 135.4, 134.5, 130.3, 130.0, 129.3, 129.1, 129.0, 128.8, 128.5, 128.3, 128.2, 128.1, 127.7, 127.4, 124.2, 122.0, 121.6, 119.5, 118.0, 117.7, 113.7, 113.3, 112.0, 111.7, 99.6. Chiralpak IB column, 80:20 hexanes/ isopropanol, 1 ml/min,  $t_{\text{R}} = 27.0$  min (major), 20.4 min (minor), 99% ee.  $[\alpha]_{\text{D}}^{25} = 1516$  ( $c = 0.5, \text{CHCl}_3$ ). HRMS (ESI) found  $[\text{M}+\text{H}]^+ 638.2230$ ,  $\text{C}_{46}\text{H}_{28}\text{N}_3\text{O}^+$  requires 638.2227.

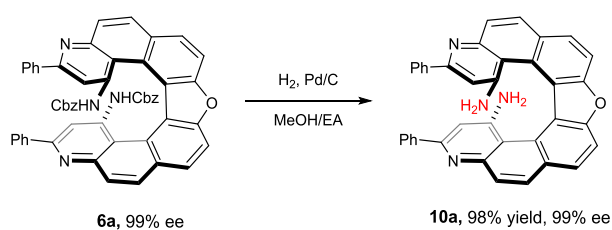

To a solution of **6a** (200 mg, 0.244 mmol) in  $\text{MeOH/EA}$  (10 mL/5 mL) was added  $\text{Pd/C}$  (ca. 30 mg, 10%  $\text{Pd}$ , 55 wt%  $\text{H}_2\text{O}$ ) at rt. After stirring under  $\text{H}_2$  atmosphere (1.0 atm, balloon) for 12 h at rt, the mixture was filtered through Celite. The filtrate was concentrated under vacuum to give a residue, which was triturated with  $\text{DCM}$  and filtered to afford **10a** as a light yellow solid (132 mg, 98% yield, 99% ee).  $^1\text{H}$  NMR (500 MHz,  $\text{MeOD}$ )  $\delta$  8.28 (d,  $J = 8.5$  Hz, 1H), 8.18 (d,  $J = 8.9$  Hz, 1H), 8.12 (d,  $J = 8.4$  Hz, 1H), 7.97 (d,  $J = 8.9$  Hz, 1H), 7.61 – 7.55 (m, 2H), 7.21 – 7.14 (m, 1H), 7.11 – 7.06 (m, 2H), 6.11 (s, 1H), 5.49 (s, 2H). *Due to the compound's poor solubility in various deuterated solvents, its  $^{13}\text{C}$  NMR*

*spectrum was not recorded.* Chiralpak IA column, 70:30 hexanes/ isopropanol, 1 ml/min,  $t_R = 5.6$  min (major), > 99% ee.  $[\alpha]_D^{25} = 859$  ( $c = 0.1$ ,  $\text{CHCl}_3$ ). HRMS (ESI) found  $[\text{M}+\text{H}]^+$  553.2028,  $\text{C}_{38}\text{H}_{25}\text{N}_4\text{O}^+$  requires 553.2023.

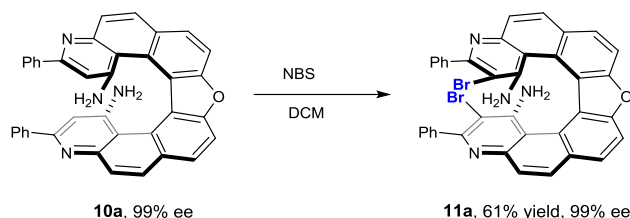

To a solution of **10a** (20 mg, 0.036 mmol) in DCM (2 mL) was added NBS (14 mg, 0.0792 mmol, 2.2 equiv.) at rt. After stirring at rt for 5.5 h, the mixture was concentrated under vacuum to give a residue, which was purified by column chromatography on silica gel using petroleum ether/ethyl acetate = 3/1 as eluent to afford **11a** as an orange solid (15.5 mg, 61% yield, 99% ee).  $^1\text{H}$  NMR (500 MHz,  $\text{CDCl}_3$ )  $\delta$  8.25 (d,  $J = 8.4$  Hz, 1H), 8.16 (d,  $J = 8.8$  Hz, 1H), 8.11 (dd,  $J = 8.6, 7.1$  Hz, 2H), 7.65 – 7.58 (m, 2H), 7.37 – 7.30 (m, 1H), 7.24 – 7.15 (m, 2H), 3.97 (s, 2H).  $^{13}\text{C}$  NMR (126 MHz,  $\text{CDCl}_3$ )  $\delta$  157.0, 154.9, 148.1, 147.6, 139.6, 130.7, 130.6, 128.9, 128.5, 128.2, 128.1, 127.5, 124.5, 118.7, 112.6, 110.7, 100.6. Chiralpak IA column, 80:20 hexanes/ isopropanol, 1 ml/min,  $t_R = 11.7$  min (major), 18.0 min (minor), 99% ee.  $[\alpha]_D^{25} = 1581$  ( $c = 1$ ,  $\text{CHCl}_3$ ). HRMS (ESI) found  $[\text{M}+\text{H}]^+$  709.0232,  $\text{C}_{38}\text{H}_{23}\text{Br}_2\text{N}_4\text{O}^+$  requires 709.0233.

## Optical properties of the products

Unless otherwise noted, CD analysis, absorbance analysis and fluorescence analysis were performed at 20 °C with 1.0 cm x 1.0 cm quartz cell.

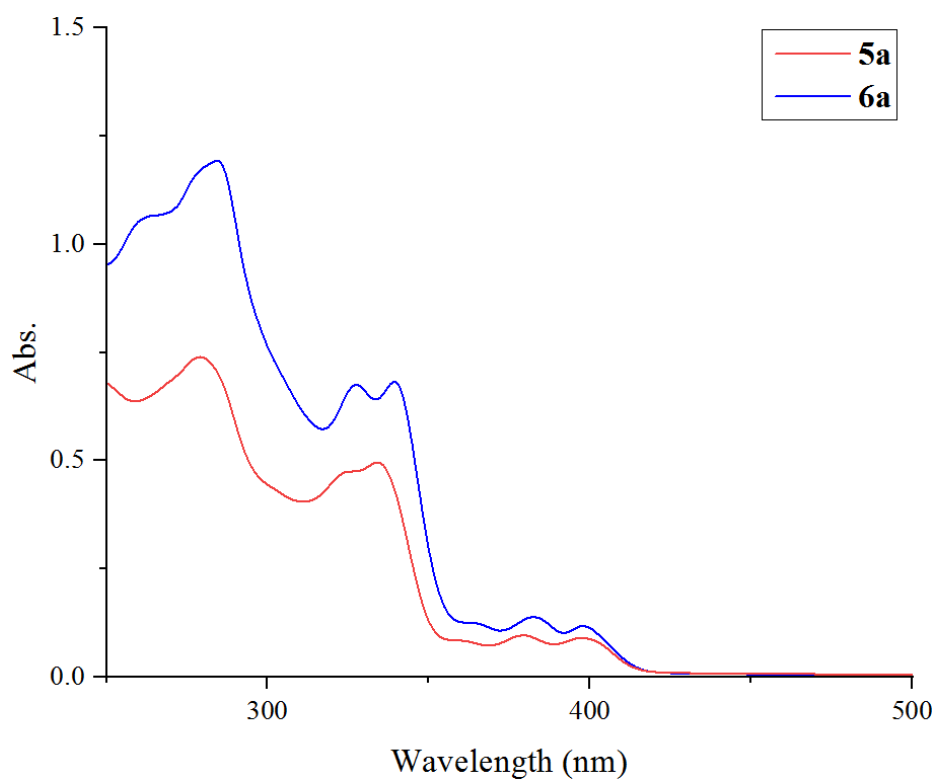

**Figure S1.** UV/vis absorbance spectra for **5a** and **6a** measured in DCM ( $1.0 \times 10^{-4}$  M).

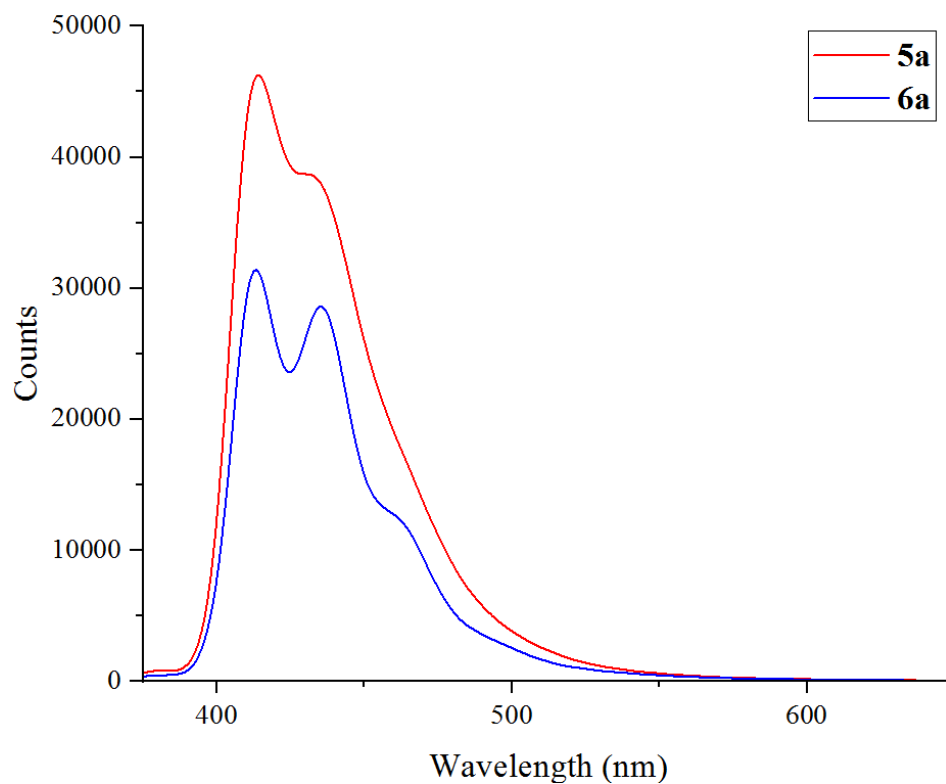

**Figure S2.** Fluorescence spectra for **5a** and **6a** measured at in dichloromethane ( $1.0 \times 10^{-4}$  M , excited by 350nm).

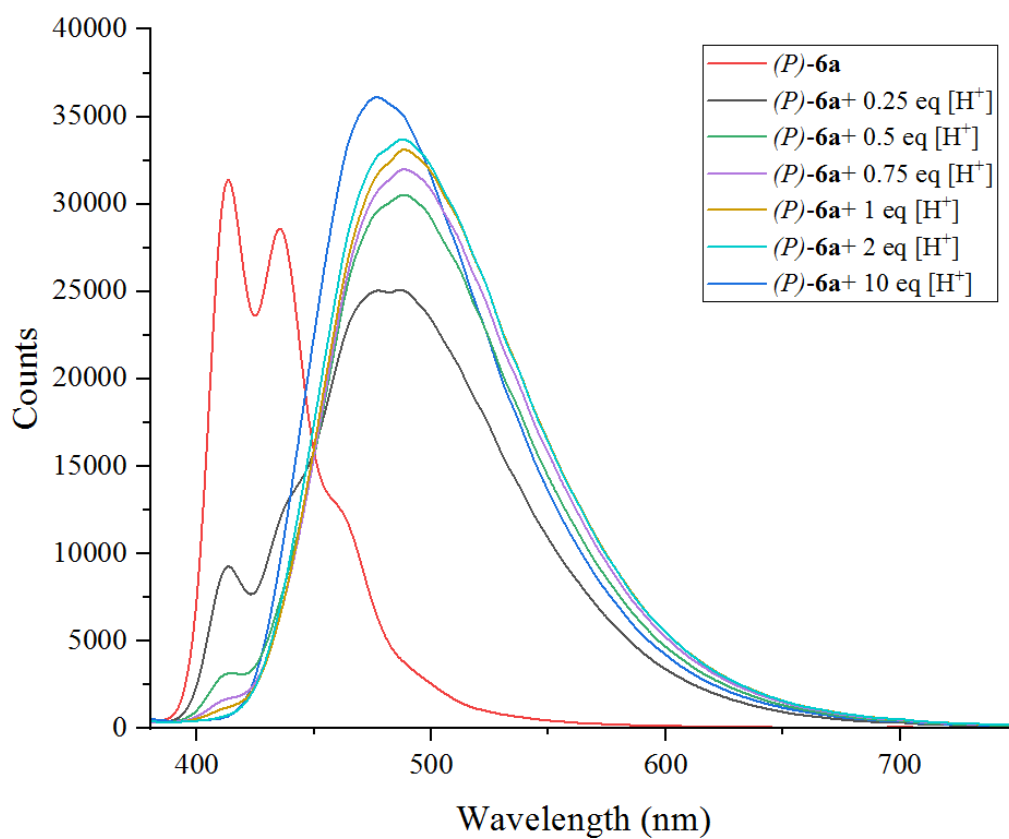

**Figure S3.** Fluorescence spectra for **5a** and  $(P)\text{-5a} + [\text{H}^+]$  measured at in dichloromethane ( $1.0 \times 10^{-4} \text{ M}$ ), excited by 350nm.

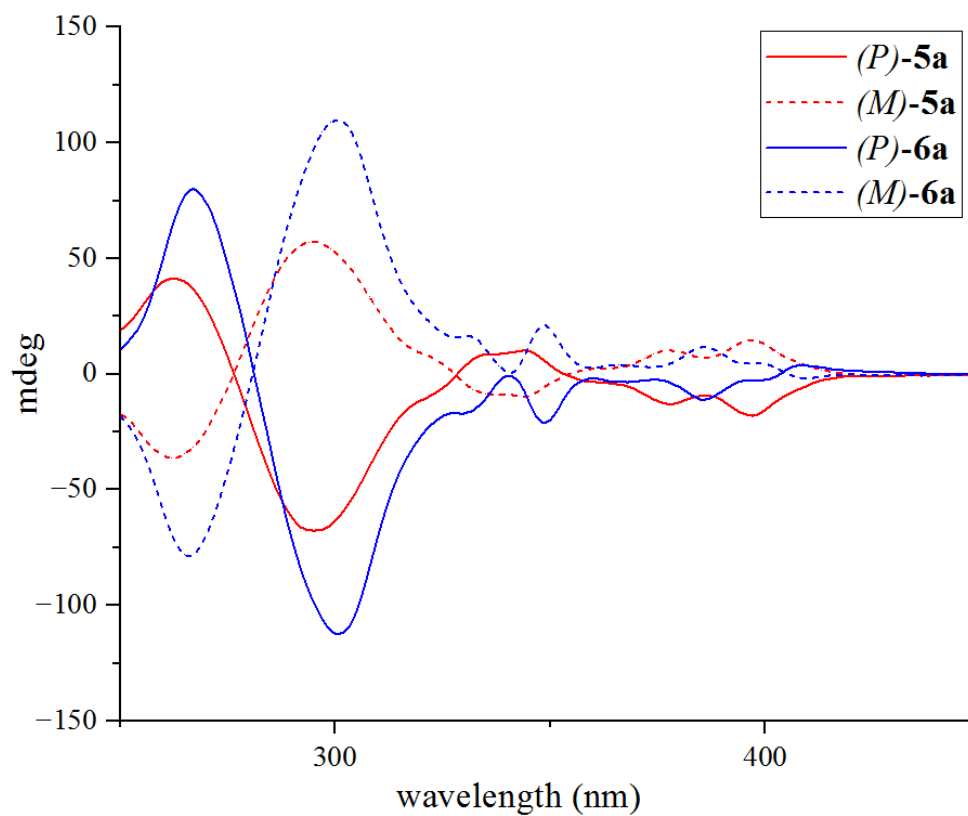

**Figure S4.** CD spectra of  $(P)/(M)\text{-5a}$  and  $(P)/(M)\text{-6a}$  in dichloromethane ( $1.0 \times 10^{-4} \text{ M}$ ).



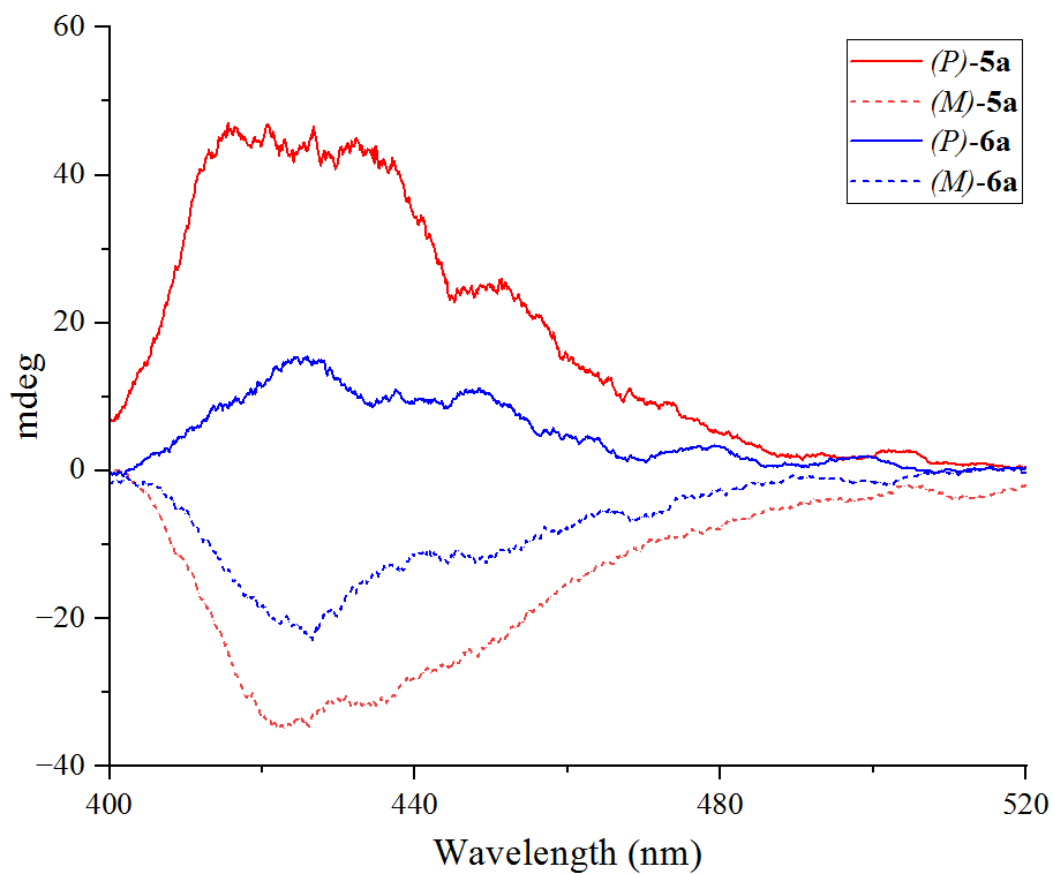

Figure S5. CPL spectra of  $(P)/(M)$ -**5a** and  $(P)/(M)$ -**6a** in DCM ( $1.0 \times 10^{-4}$  M).

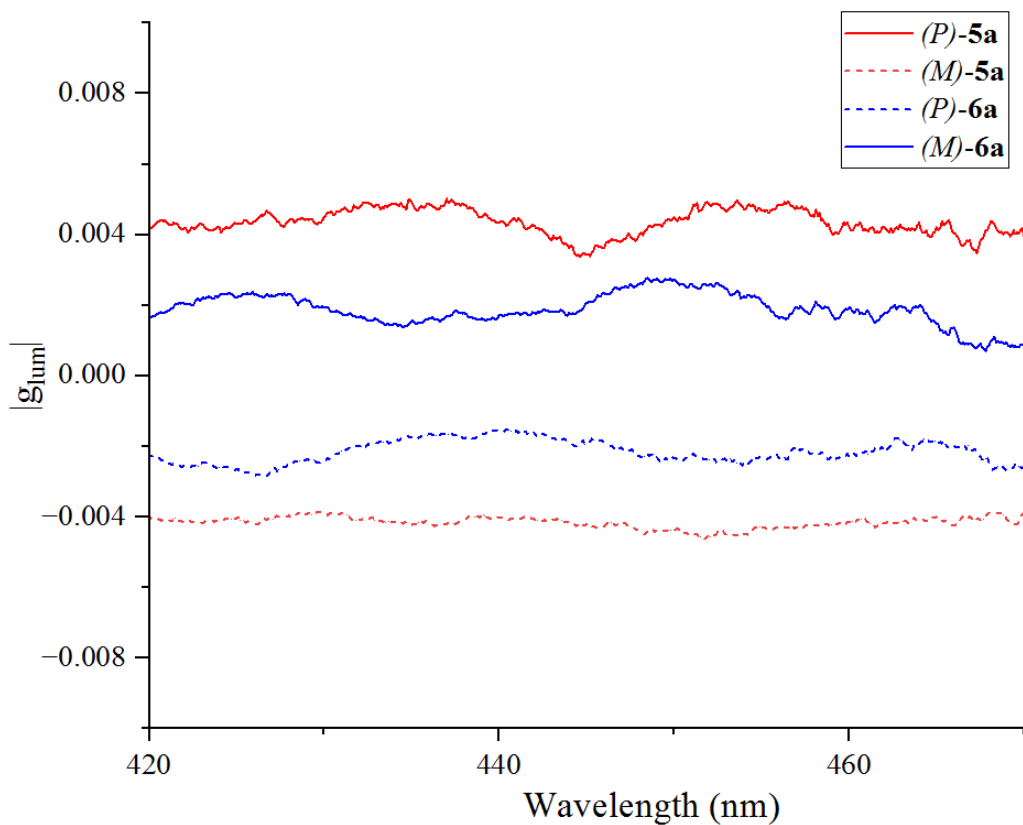

Figure S6. Dissymmetry values of azahelicenes  $(P)/(M)$ -**5a** and  $(P)/(M)$ -**6a**

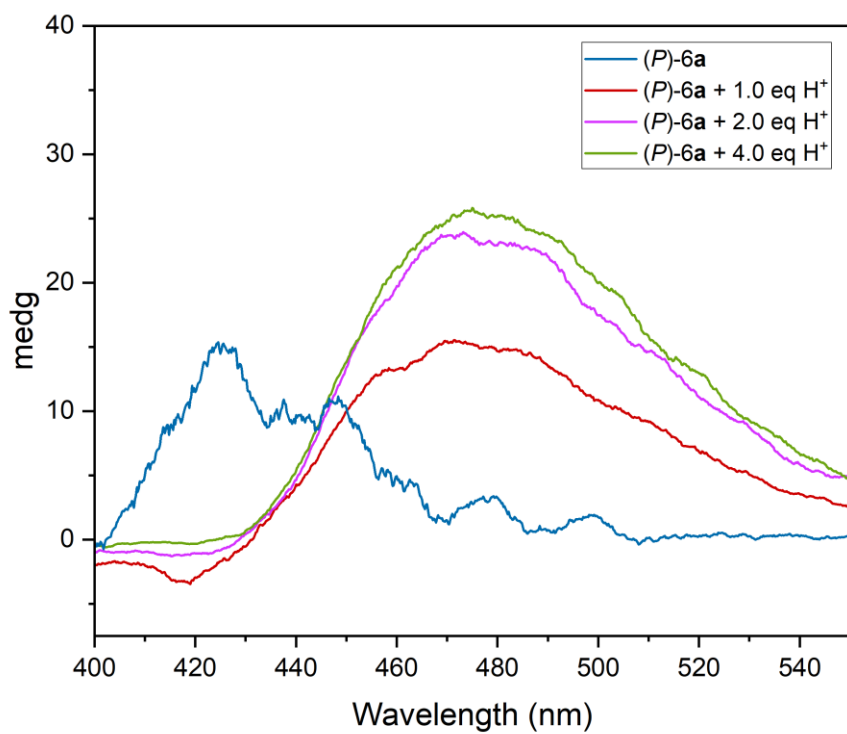

**Figure S7.** CPL spectra of (*P*-**6a** in DCM ( $1.0 \times 10^{-4}$  M) with addition of TFA.

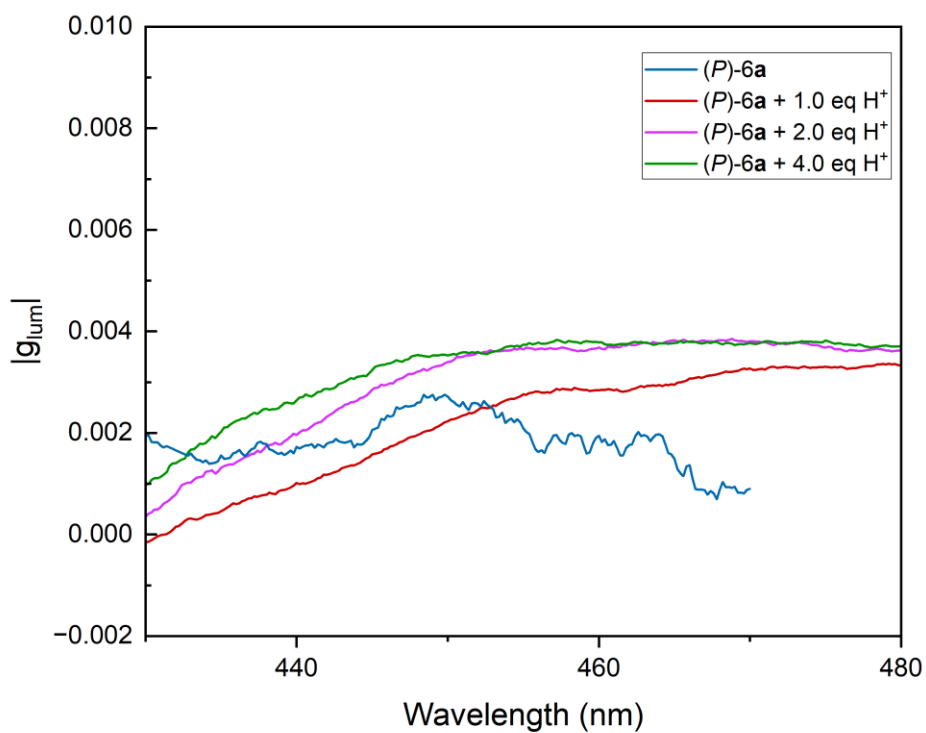

**Figure S8.** Dissymmetry values of azahelicenes (*P*) **6a** with addition of TFA.

## Reference

1. Areephong, J.; Ruangsupapichart, N.; Thongpanchang, T., A concise synthesis of functionalized 7-oxa-[5]-helicenes. *Tetrahedron Letters* **2004**, *45* (15), 3067-3070.
2. Chang, X.; Zhang, Q.; Guo, C., Switchable Smiles Rearrangement for Enantioselective O-Aryl Amination. *Org Lett* **2019**, *21* (12), 4915-4918.
3. Hoang, T. T.; Smith, T. P.; Raines, R. T., A Boronic Acid Conjugate of Angiogenin that Shows ROS-Responsive Neuroprotective Activity. *Angew Chem Int Ed* **2017**, *56* (10), 2619-2622.

## X-ray structure

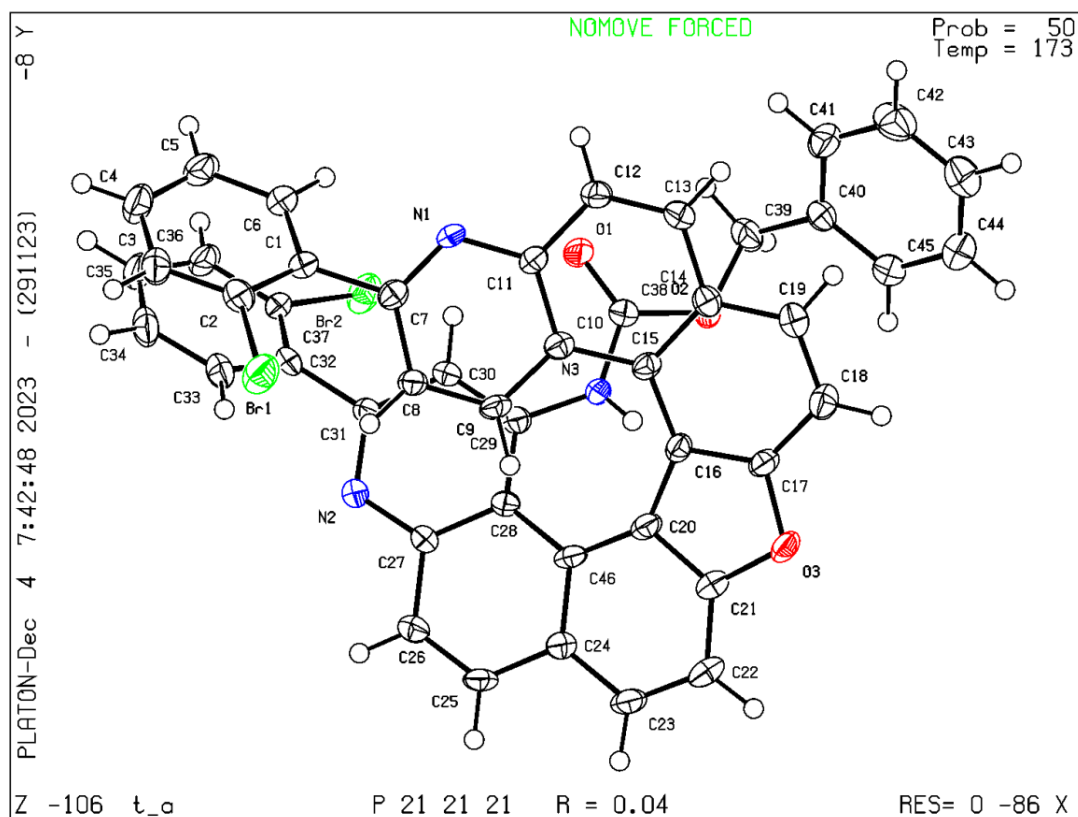

Figure S9. X-ray structure of (*P*)-**5i** (CCDC number 2401332)

**Table S1 Crystal data and structure refinement for (P)-5i.**

---

|                                             |                                                                               |
|---------------------------------------------|-------------------------------------------------------------------------------|
| Identification code                         | t_a                                                                           |
| Empirical formula                           | C <sub>46</sub> H <sub>27</sub> Br <sub>2</sub> N <sub>3</sub> O <sub>3</sub> |
| Formula weight                              | 829.52                                                                        |
| Temperature/K                               | 173(2)                                                                        |
| Crystal system                              | orthorhombic                                                                  |
| Space group                                 | P2 <sub>1</sub> 2 <sub>1</sub> 2 <sub>1</sub>                                 |
| a/Å                                         | 10.1539(4)                                                                    |
| b/Å                                         | 11.8063(5)                                                                    |
| c/Å                                         | 29.1718(12)                                                                   |
| α/°                                         | 90                                                                            |
| β/°                                         | 90                                                                            |
| γ/°                                         | 90                                                                            |
| Volume/Å <sup>3</sup>                       | 3497.1(2)                                                                     |
| Z                                           | 4                                                                             |
| ρ <sub>calc</sub> /g/cm <sup>3</sup>        | 1.576                                                                         |
| μ/mm <sup>-1</sup>                          | 3.338                                                                         |
| F(000)                                      | 1672.0                                                                        |
| Crystal size/mm <sup>3</sup>                | 0.160 × 0.150 × 0.120                                                         |
| Radiation                                   | CuKα (λ = 1.54178)                                                            |
| 2Θ range for data collection/°              | 8.078 to 137.714                                                              |
| Index ranges                                | -12 ≤ h ≤ 12, -13 ≤ k ≤ 14, -35 ≤ l ≤ 34                                      |
| Reflections collected                       | 43860                                                                         |
| Independent reflections                     | 6434 [R <sub>int</sub> = 0.0695, R <sub>sigma</sub> = 0.0421]                 |
| Data/restraints/parameters                  | 6434/0/490                                                                    |
| Goodness-of-fit on F <sup>2</sup>           | 1.058                                                                         |
| Final R indexes [I >= 2σ (I)]               | R <sub>1</sub> = 0.0441, wR <sub>2</sub> = 0.1085                             |
| Final R indexes [all data]                  | R <sub>1</sub> = 0.0478, wR <sub>2</sub> = 0.1110                             |
| Largest diff. peak/hole / e Å <sup>-3</sup> | 0.40/-0.86                                                                    |
| Flack parameter                             | 0.065(8)                                                                      |

---

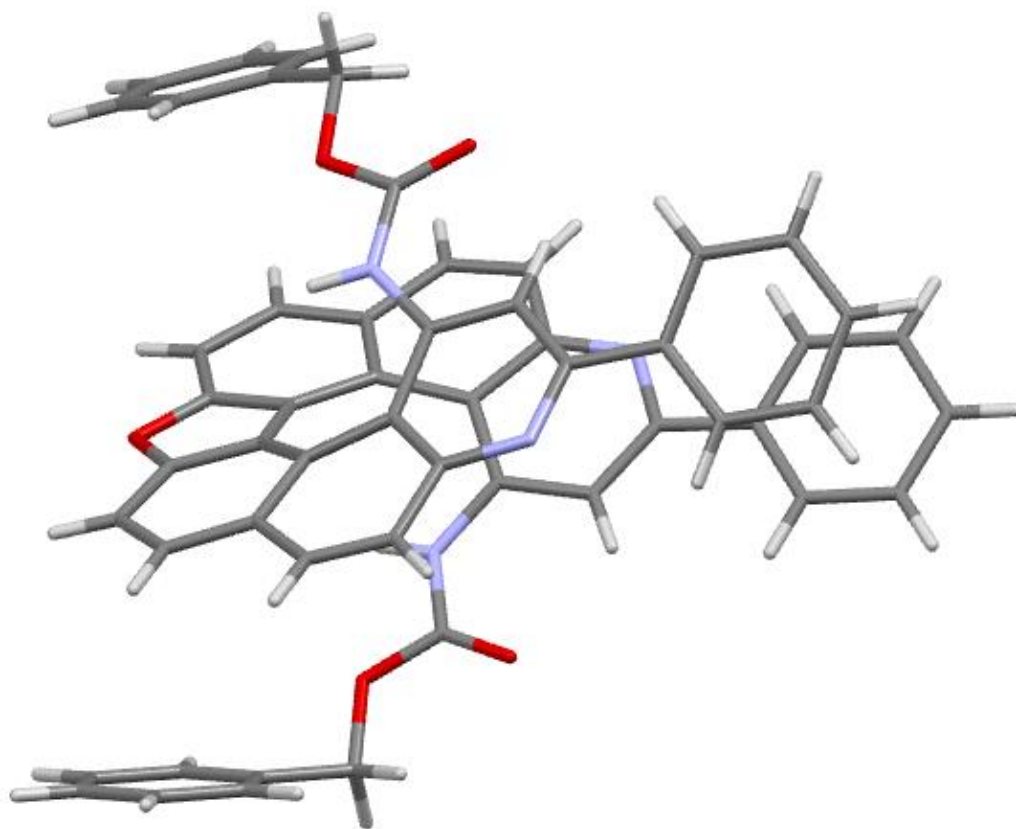

**Figure S10.** X-ray structure of **6a** (CCDC number 2401205)

**Table S2. Crystal data and structure refinement for 6a**

|                                             |                                                                |
|---------------------------------------------|----------------------------------------------------------------|
| Identification code                         | t                                                              |
| Empirical formula                           | C <sub>54</sub> H <sub>36</sub> N <sub>4</sub> O <sub>5</sub>  |
| Formula weight                              | 820.87                                                         |
| Temperature/K                               | 173.00                                                         |
| Crystal system                              | orthorhombic                                                   |
| Space group                                 | P2 <sub>1</sub> 2 <sub>1</sub> 2                               |
| a/Å                                         | 21.7158(6)                                                     |
| b/Å                                         | 40.9507(11)                                                    |
| c/Å                                         | 14.8230(4)                                                     |
| α/°                                         | 90                                                             |
| β/°                                         | 90                                                             |
| γ/°                                         | 90                                                             |
| Volume/Å <sup>3</sup>                       | 13181.8(6)                                                     |
| Z                                           | 12                                                             |
| ρ <sub>calc</sub> /cm <sup>3</sup>          | 1.241                                                          |
| μ/mm <sup>-1</sup>                          | 0.645                                                          |
| F(000)                                      | 5136.0                                                         |
| Crystal size/mm <sup>3</sup>                | 0.14 × 0.12 × 0.1                                              |
| Radiation                                   | CuKα (λ = 1.54178)                                             |
| 2θ range for data collection/°              | 4.316 to 137.11                                                |
| Index ranges                                | -25 ≤ h ≤ 26, -49 ≤ k ≤ 49, -17 ≤ l ≤ 17                       |
| Reflections collected                       | 147661                                                         |
| Independent reflections                     | 24194 [R <sub>int</sub> = 0.0874, R <sub>sigma</sub> = 0.0552] |
| Data/restraints/parameters                  | 24194/711/1788                                                 |
| Goodness-of-fit on F <sup>2</sup>           | 1.008                                                          |
| Final R indexes [I ≥ 2σ (I)]                | R <sub>1</sub> = 0.0789, wR <sub>2</sub> = 0.2109              |
| Final R indexes [all data]                  | R <sub>1</sub> = 0.1110, wR <sub>2</sub> = 0.2423              |
| Largest diff. peak/hole / e Å <sup>-3</sup> | 0.76/-0.44                                                     |
| Flack parameter                             | 2.19(9)                                                        |

## HPLC traces

### Helicenoid 4a

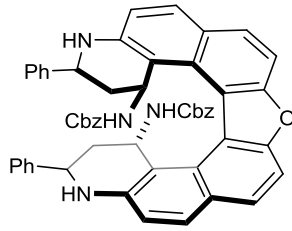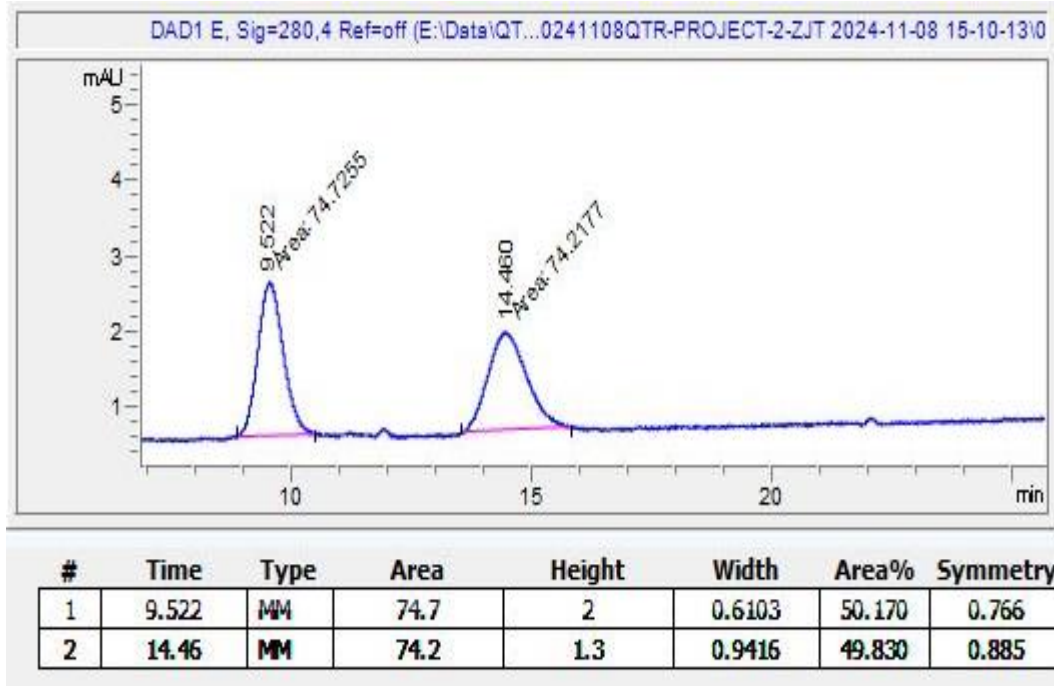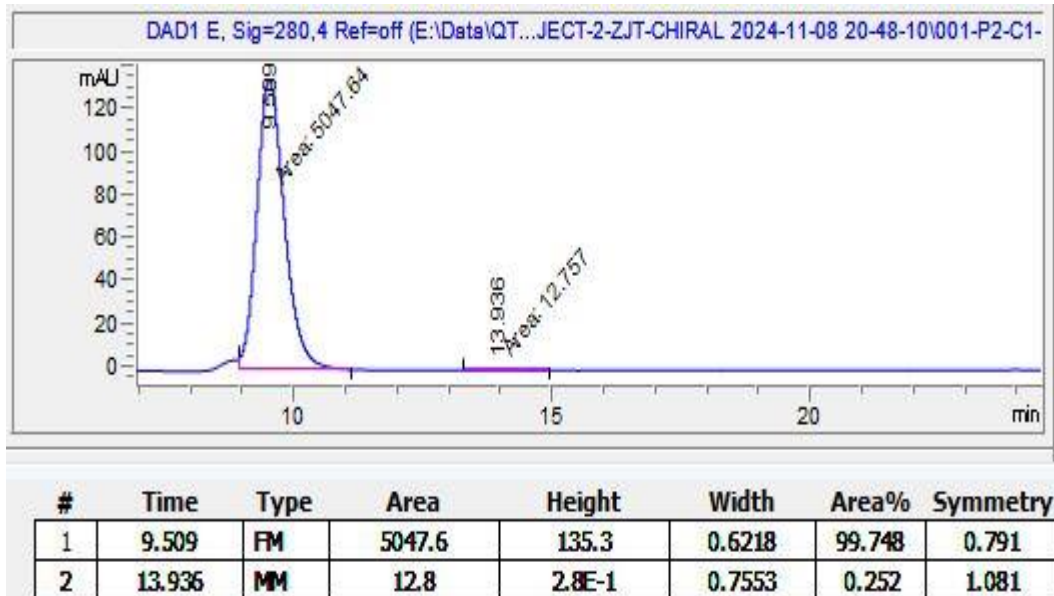



### Heterohelicene 5a

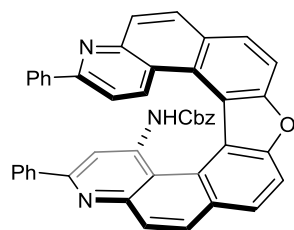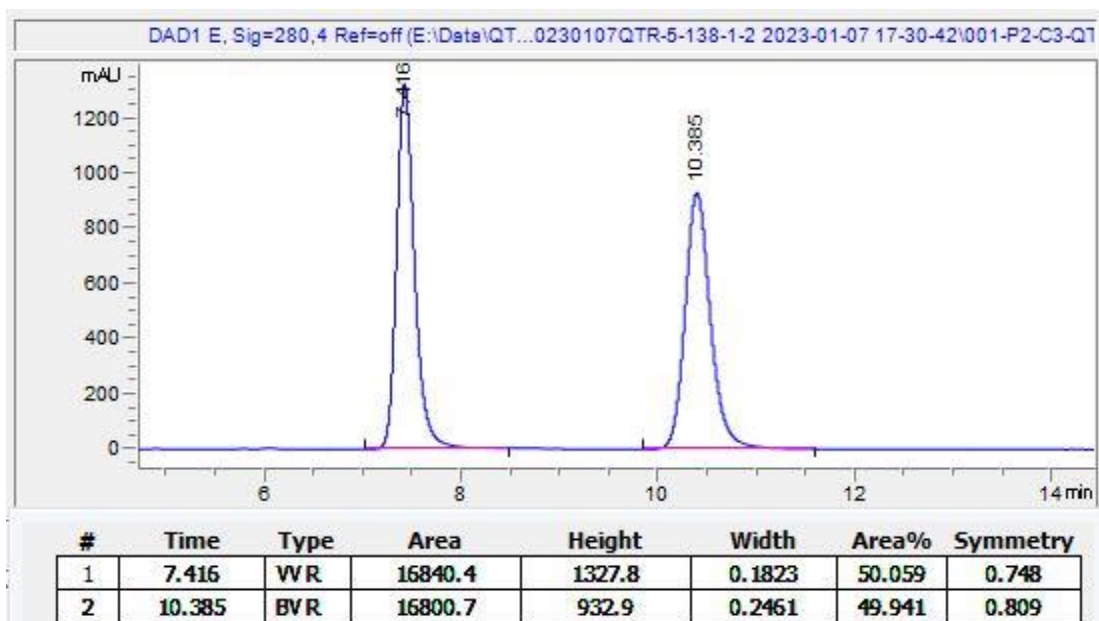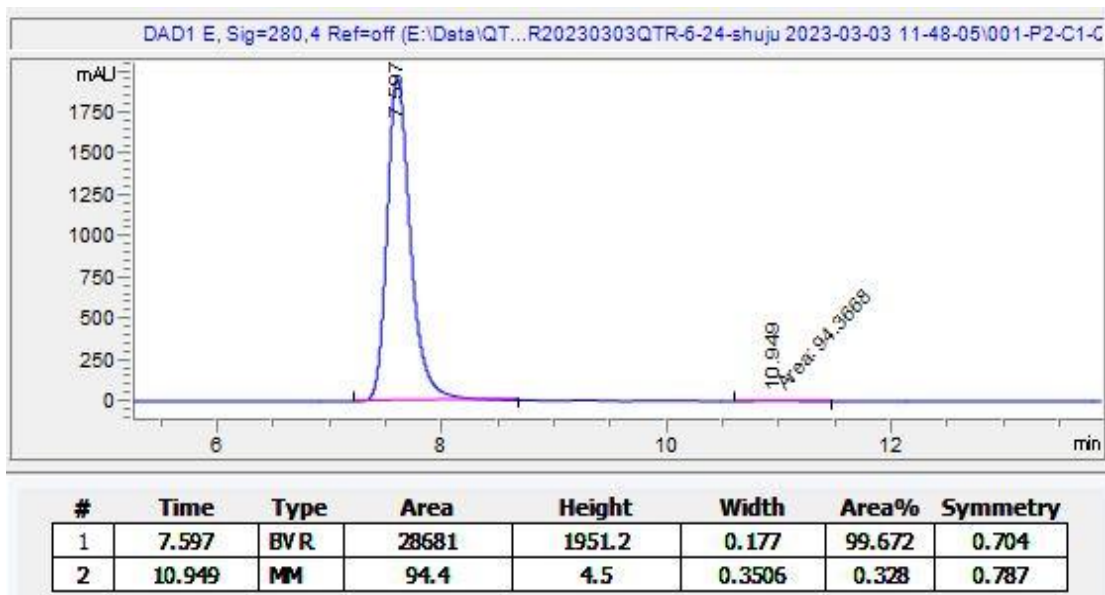

### Heterohelicene 5b

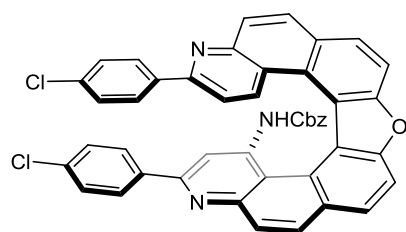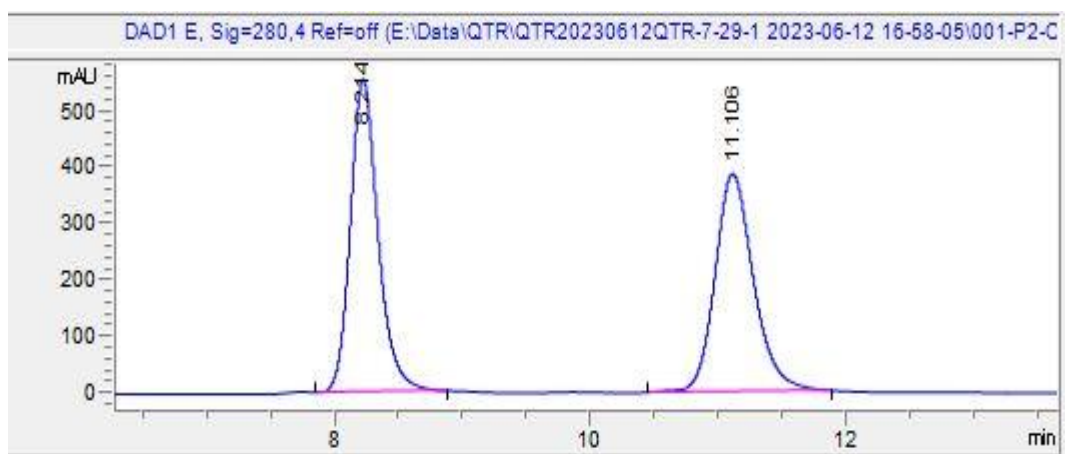

| # | Time   | Type | Area   | Height | Width  | Area%  | Symmetry |
|---|--------|------|--------|--------|--------|--------|----------|
| 1 | 8.214  | BVR  | 8363   | 553.1  | 0.1799 | 50.875 | 0.805    |
| 2 | 11.106 | VVR  | 8075.3 | 385.6  | 0.2464 | 49.125 | 0.817    |

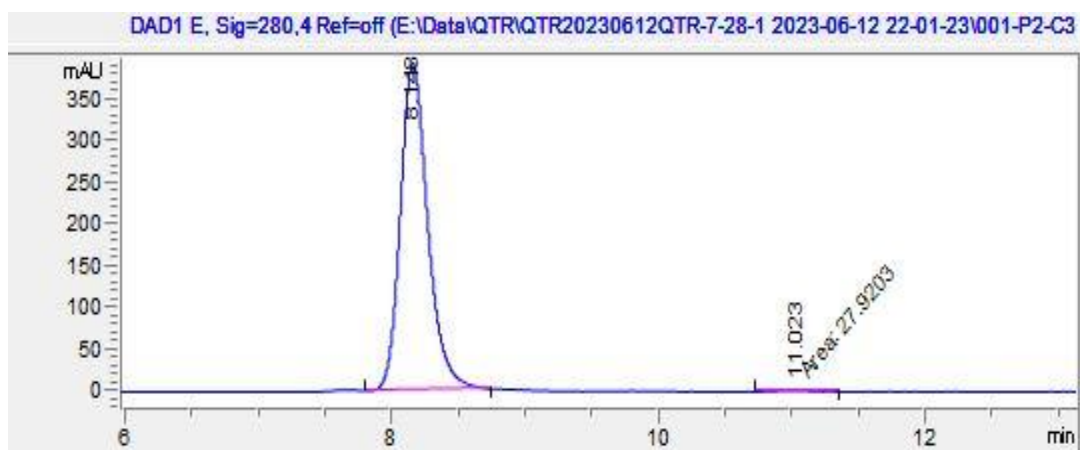

| # | Time   | Type | Area   | Height | Width  | Area%  | Symmetry |
|---|--------|------|--------|--------|--------|--------|----------|
| 1 | 8.148  | BVR  | 5577.1 | 390.6  | 0.1686 | 99.502 | 0.791    |
| 2 | 11.023 | MM   | 27.9   | 1.5    | 0.3035 | 0.498  | 1.131    |

### Heterohelicene 5c

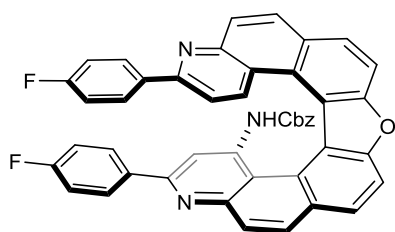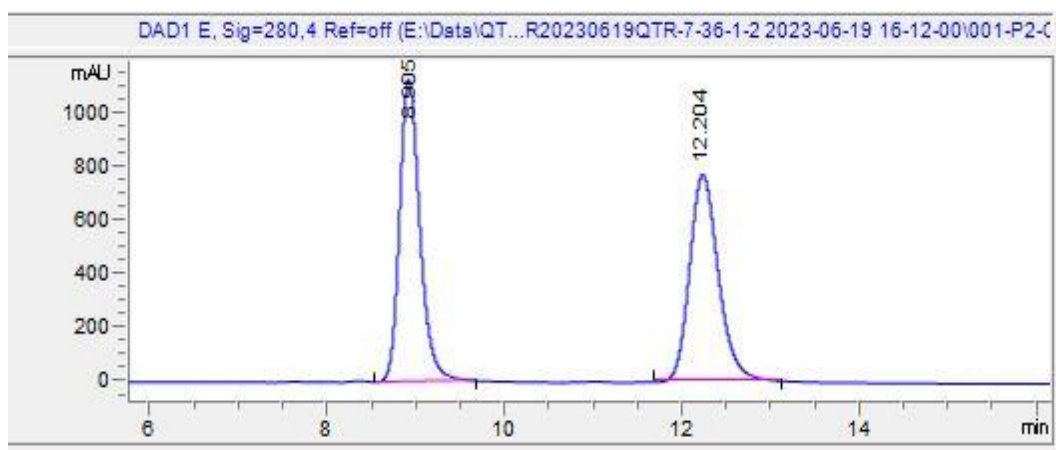

| # | Time   | Type | Area    | Height | Width  | Area%  | Symmetry |
|---|--------|------|---------|--------|--------|--------|----------|
| 1 | 8.905  | BV R | 17992.7 | 1133.3 | 0.1887 | 50.576 | 0.845    |
| 2 | 12.204 | BV R | 17582.8 | 776.2  | 0.2663 | 49.424 | 0.777    |

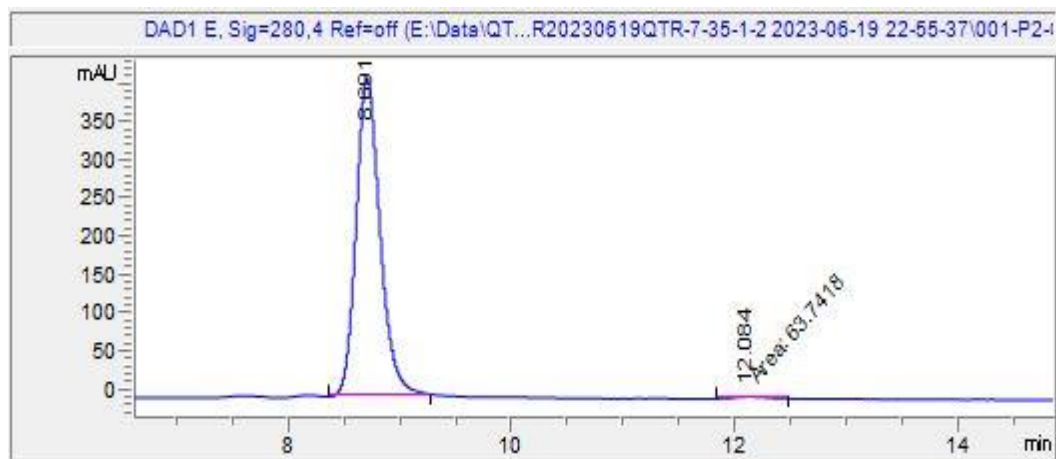

| # | Time   | Type | Area   | Height | Width  | Area%  | Symmetry |
|---|--------|------|--------|--------|--------|--------|----------|
| 1 | 8.691  | BV R | 6249.4 | 416.7  | 0.1805 | 98.990 | 0.82     |
| 2 | 12.084 | MM   | 63.7   | 3.6    | 0.2981 | 1.010  | 0.649    |

### Heterohelicene 5d

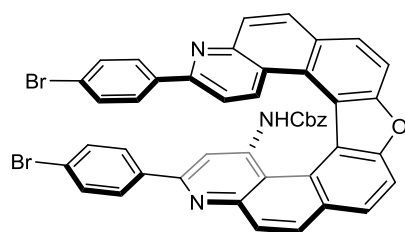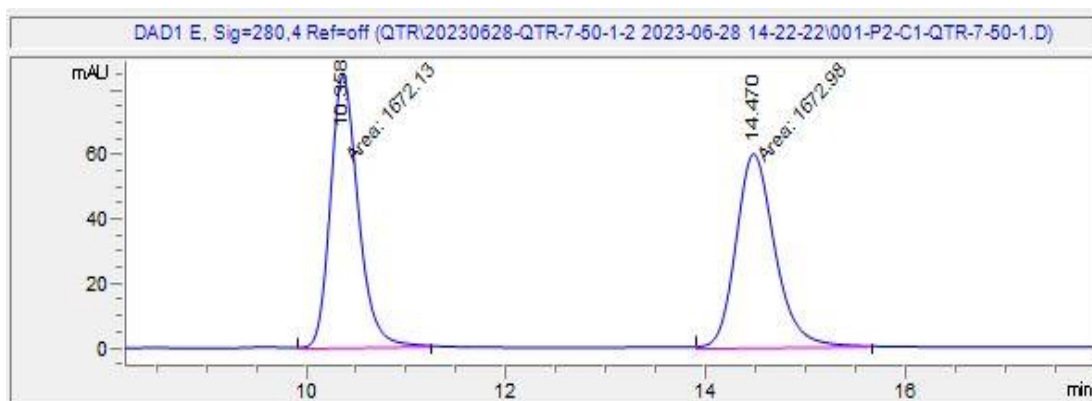

| # | 时间     | 峰面积    | 峰高   | 峰宽     | 峰面积 %  | 对称因子  | 类型 | Type |
|---|--------|--------|------|--------|--------|-------|----|------|
| 1 | 10.358 | 1672.1 | 84.9 | 0.3284 | 49.987 | 0.781 | MM | MM   |
| 2 | 14.47  | 1673   | 60.5 | 0.4606 | 50.013 | 0.795 | MM | MM   |

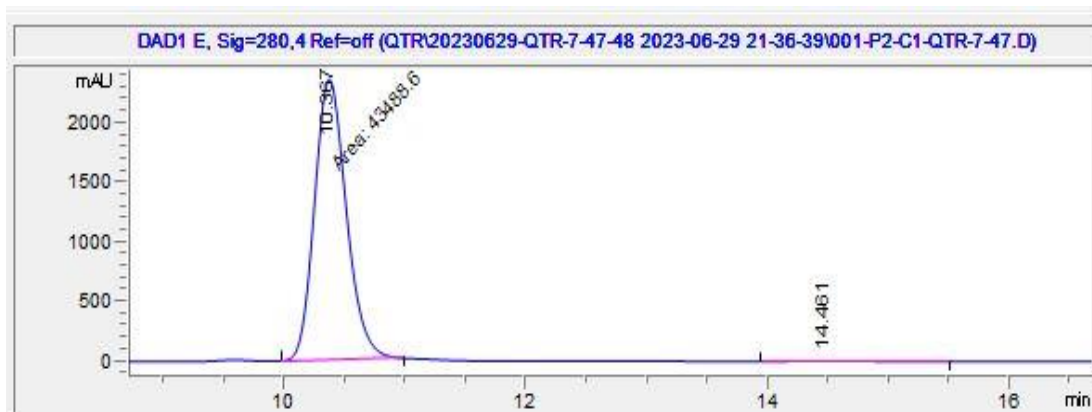

| # | 时间     | 峰面积     | 峰高     | 峰宽     | 峰面积 %  | 对称因子  | 类型 | Type |
|---|--------|---------|--------|--------|--------|-------|----|------|
| 1 | 10.367 | 43488.6 | 2358.6 | 0.3073 | 99.760 | 0.833 | MM | MM   |
| 2 | 14.461 | 104.8   | 3.6    | 0.4338 | 0.240  | 0.671 | BB | BB   |

### Heterohelicene 5e

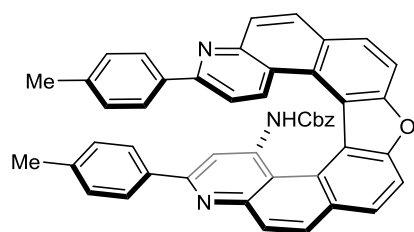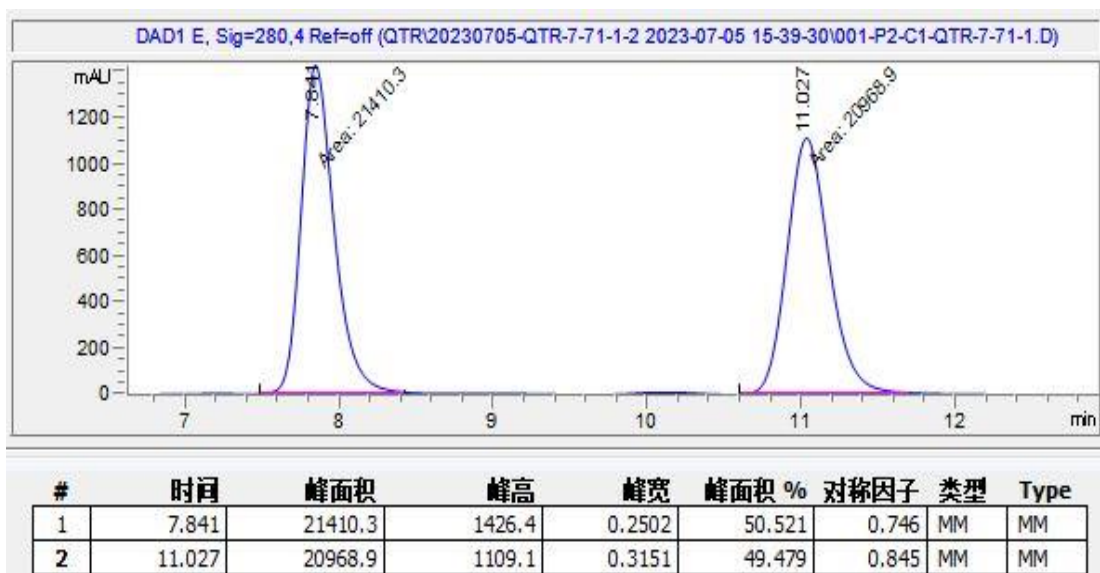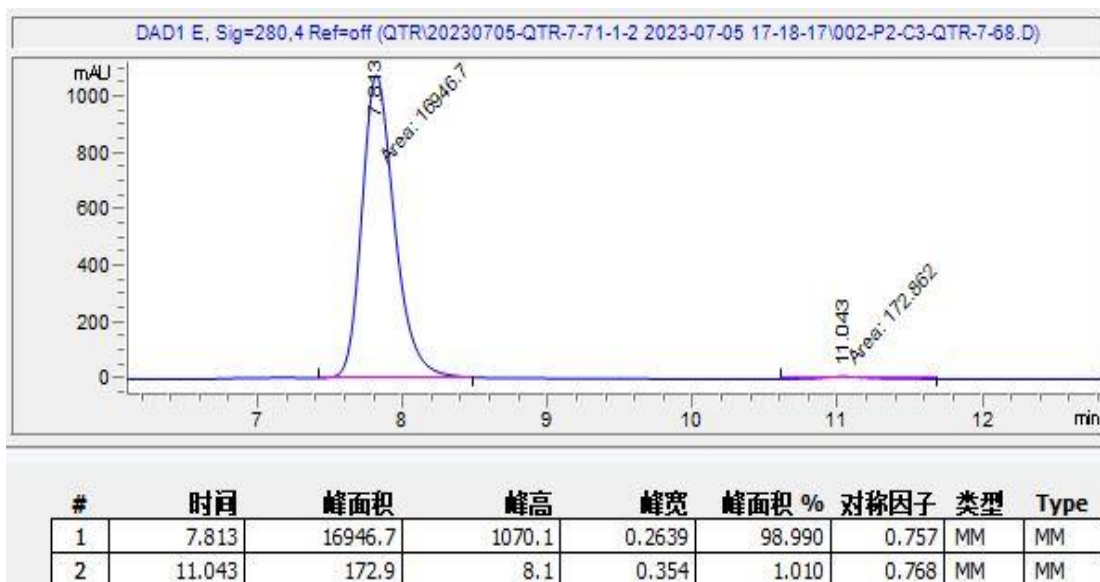



### Heterohelicene 5f

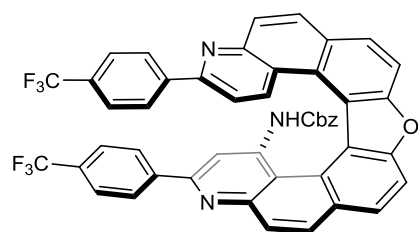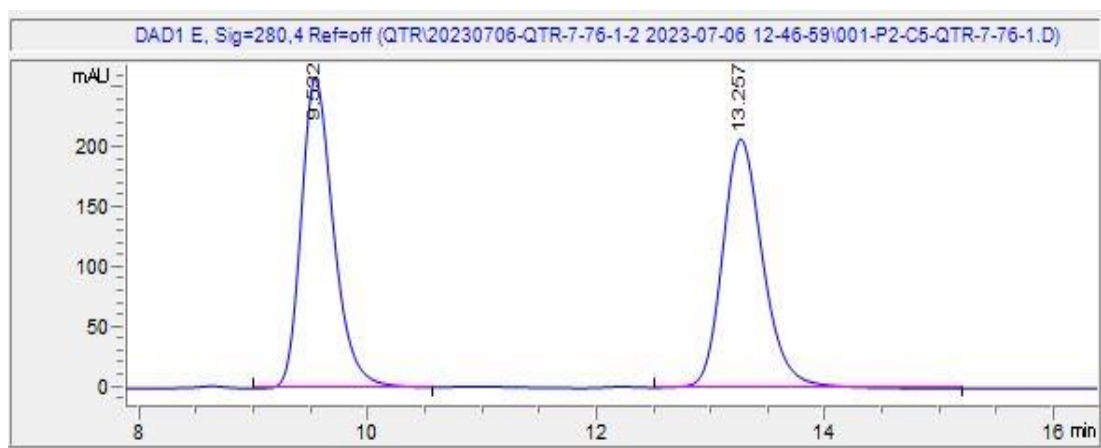

| # | 时间     | 峰面积    | 峰高    | 峰宽     | 峰面积 %  | 对称因子  | 类型 | Type |
|---|--------|--------|-------|--------|--------|-------|----|------|
| 1 | 9.532  | 5067.7 | 257.2 | 0.3019 | 49.995 | 0.728 | BB | BB   |
| 2 | 13.257 | 5068.6 | 206.8 | 0.374  | 50.005 | 0.779 | BB | BB   |

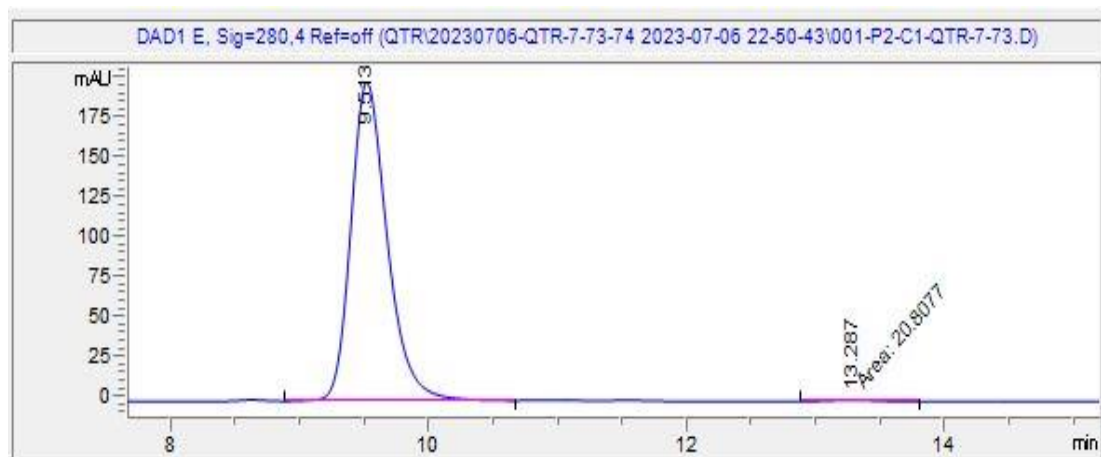

| # | 时间     | 峰面积    | 峰高    | 峰宽     | 峰面积 %  | 对称因子  | 类型 | Type |
|---|--------|--------|-------|--------|--------|-------|----|------|
| 1 | 9.513  | 3917.6 | 199.4 | 0.2992 | 99.472 | 0.733 | BB | BB   |
| 2 | 13.287 | 20.8   | 9E-1  | 0.385  | 0.528  | 0.835 | MM | MM   |

### Heterohelicene 5g

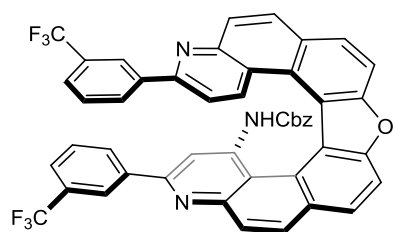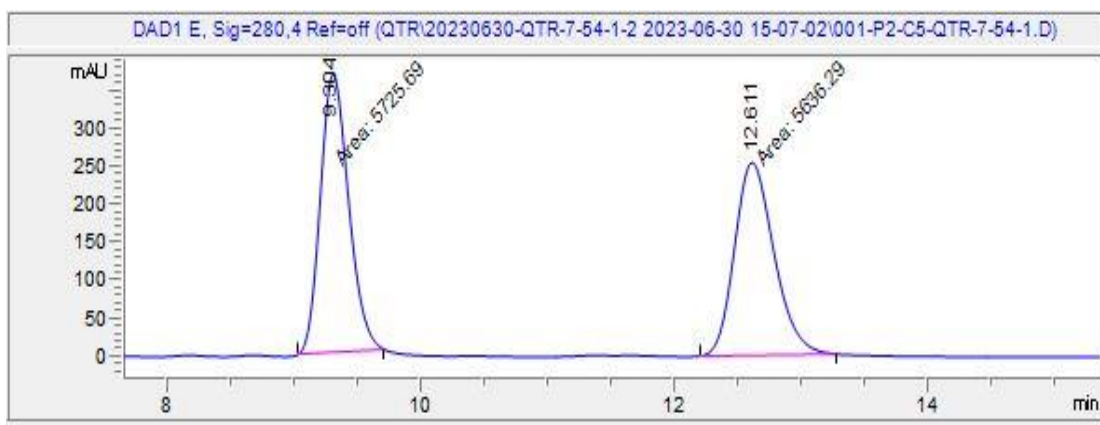

| # | 时间     | 峰面积    | 峰高    | 峰宽     | 峰面积 %  | 对称因子  | 类型 | Type |
|---|--------|--------|-------|--------|--------|-------|----|------|
| 1 | 9.304  | 5725.7 | 367.1 | 0.2599 | 50.393 | 0.796 | MM | MM   |
| 2 | 12.611 | 5636.3 | 255.9 | 0.3671 | 49.607 | 0.774 | MM | MM   |

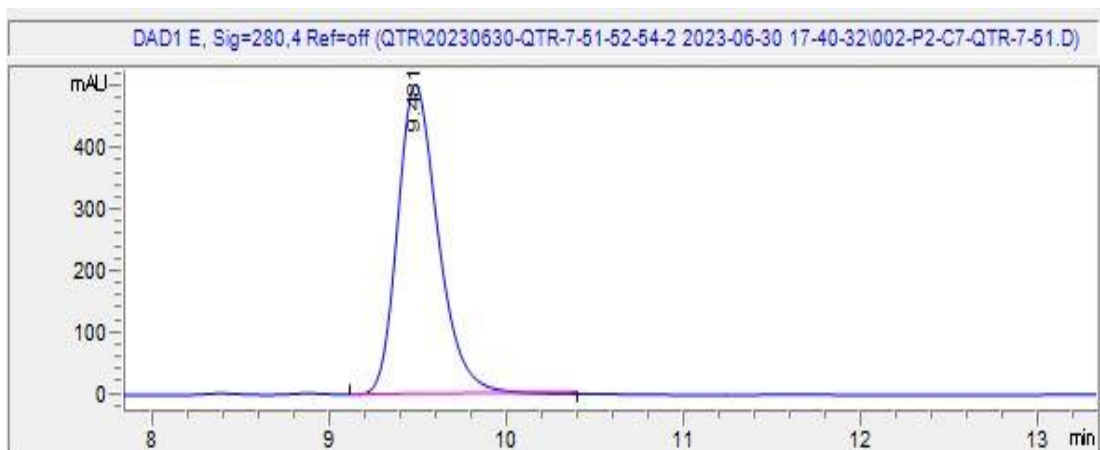

| # | 时间    | 峰面积    | 峰高    | 峰宽     | 峰面积 %   | 对称因子  | 类型 | Type |
|---|-------|--------|-------|--------|---------|-------|----|------|
| 1 | 9.481 | 8036.5 | 501.6 | 0.2449 | 100.000 | 0.721 | BB | BB   |

### Heterohelicene 5h

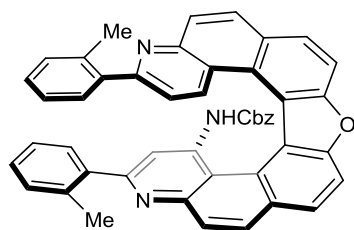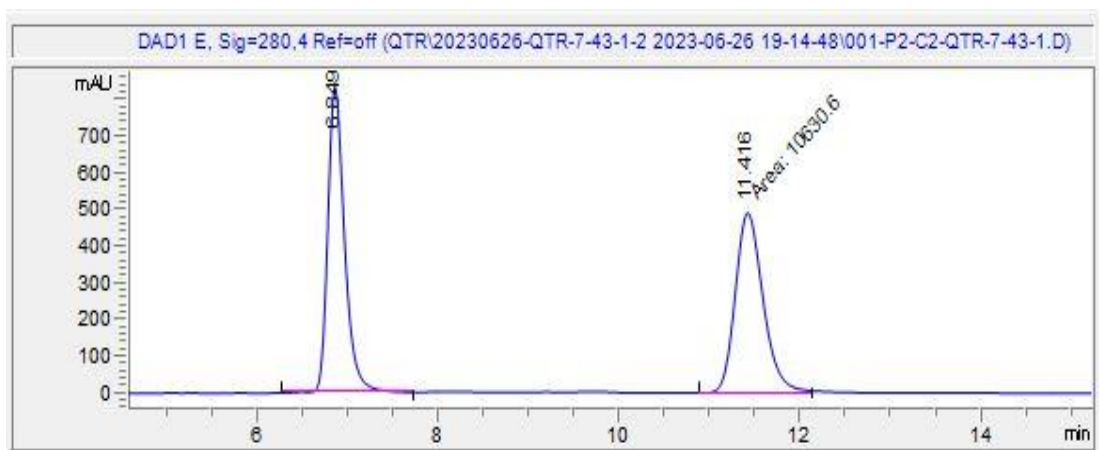

| # | 时间     | 峰面积     | 峰高    | 峰宽     | 峰面积 %  | 对称因子  | 类型   | Type |
|---|--------|---------|-------|--------|--------|-------|------|------|
| 1 | 6.849  | 10803.4 | 834.2 | 0.1967 | 50.403 | 0.706 | BB R | BB R |
| 2 | 11.416 | 10630.6 | 493.6 | 0.3589 | 49.597 | 0.782 | MM   |      |

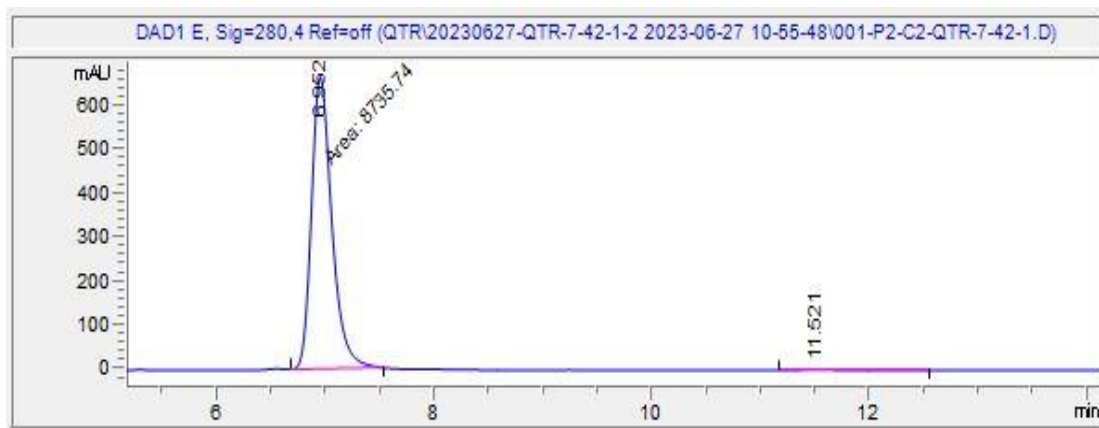

| # | 时间     | 峰面积    | 峰高  | 峰宽     | 峰面积 %  | 对称因子  | 类型 | Type |
|---|--------|--------|-----|--------|--------|-------|----|------|
| 1 | 6.952  | 8735.7 | 667 | 0.2183 | 99.714 | 0.719 | MM | MM   |
| 2 | 11.521 | 25     | 1.2 | 0.3067 | 0.286  | 0.736 | BB | BB   |



### Heterohelicene 5i

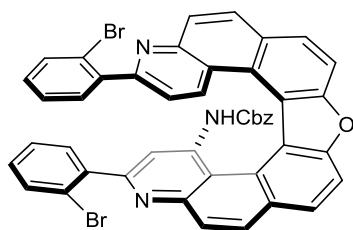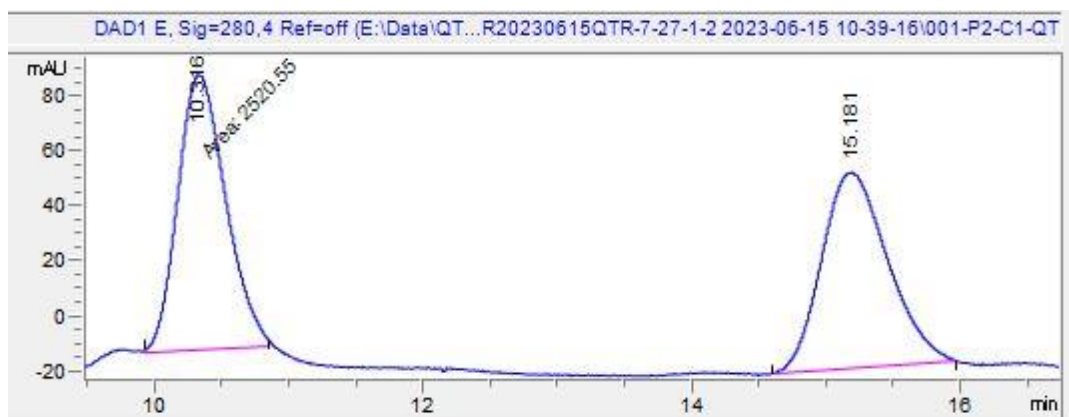

| # | Time   | Type | Area   | Height | Width  | Area%  | Symmetry |
|---|--------|------|--------|--------|--------|--------|----------|
| 1 | 10.316 | MM   | 2520.6 | 101.2  | 0.415  | 50.509 | 0.716    |
| 2 | 15.181 | WVR  | 2469.8 | 72.1   | 0.4018 | 49.491 | 0.74     |

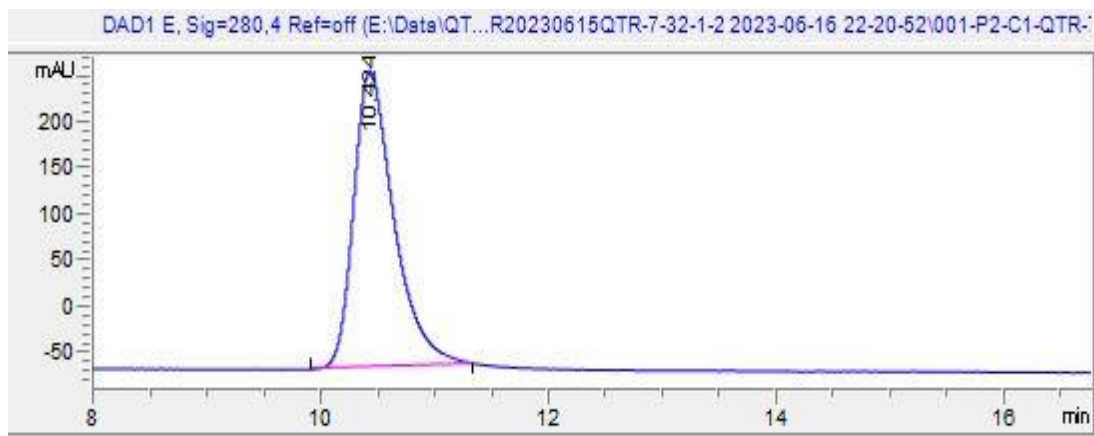

| # | Time   | Type | Area   | Height | Width  | Area%   | Symmetry |
|---|--------|------|--------|--------|--------|---------|----------|
| 1 | 10.424 | VVR  | 7905.3 | 319.4  | 0.2897 | 100.000 | 0.645    |

### Heterohelicene 5j

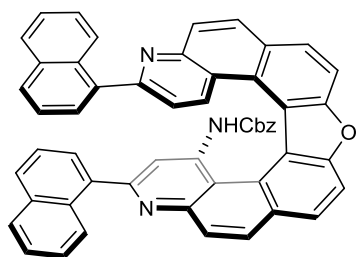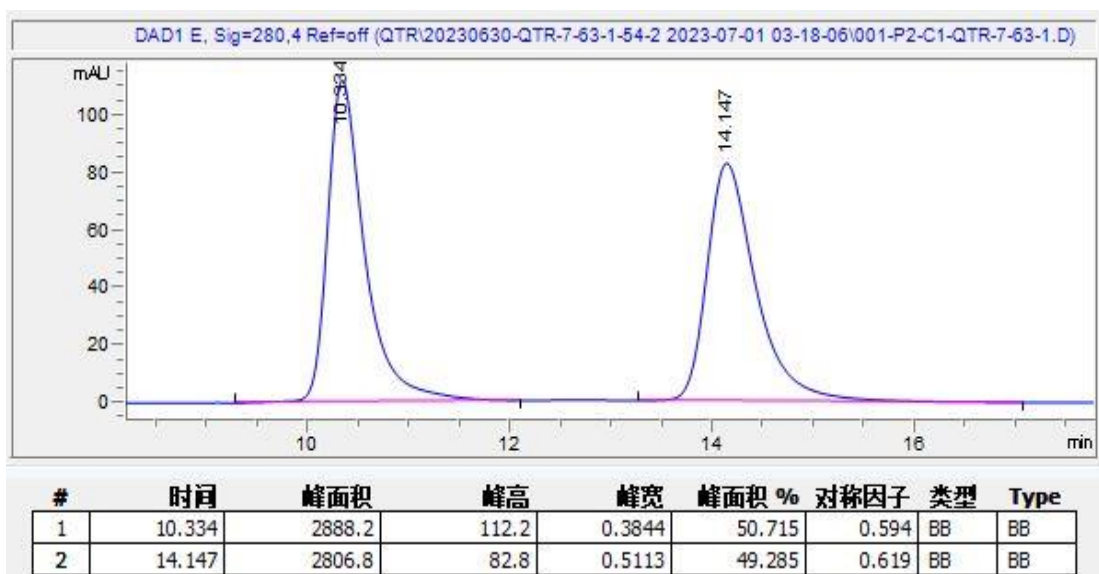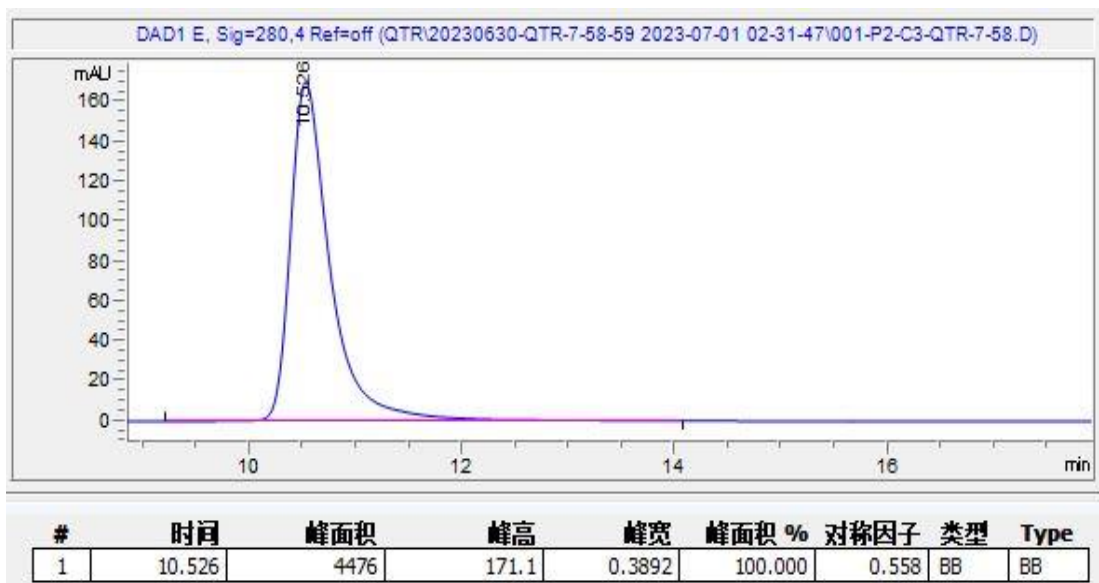

### Heterohelicene 5k

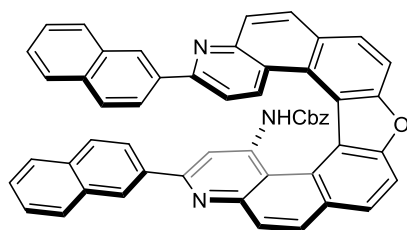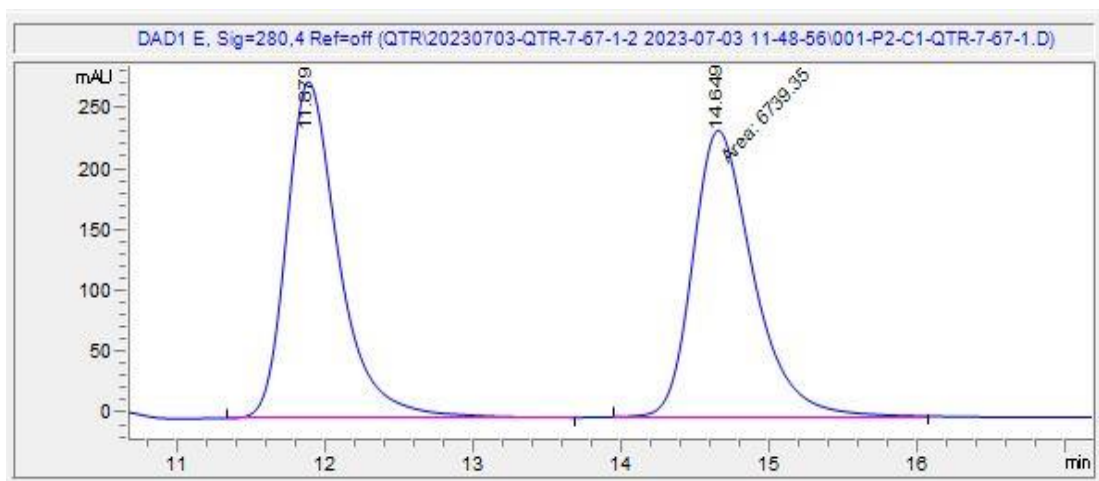

| # | 时间     | 峰面积    | 峰高    | 峰宽     | 峰面积 %  | 对称因子  | 类型 | Type |
|---|--------|--------|-------|--------|--------|-------|----|------|
| 1 | 11.879 | 6733.2 | 274.3 | 0.3703 | 49.977 | 0.677 | BB | BB   |
| 2 | 14.649 | 6739.4 | 234.4 | 0.4792 | 50.023 | 0.7   | MM |      |

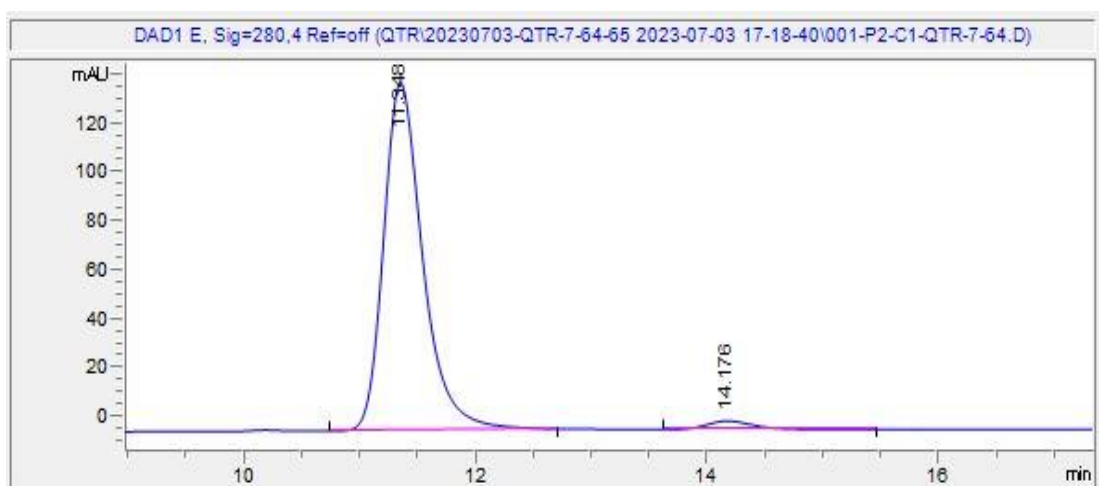

| # | 时间     | 峰面积    | 峰高    | 峰宽     | 峰面积 %  | 对称因子  | 类型 | Type |
|---|--------|--------|-------|--------|--------|-------|----|------|
| 1 | 11.348 | 3355.3 | 142.8 | 0.3562 | 97.100 | 0.705 | BB | BB   |
| 2 | 14.176 | 100.2  | 3.5   | 0.4332 | 2.900  | 0.744 | BB | BB   |

### Heterohelicene 51

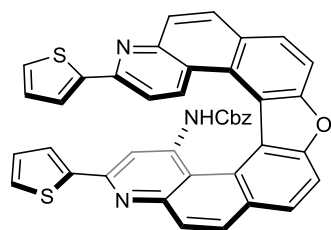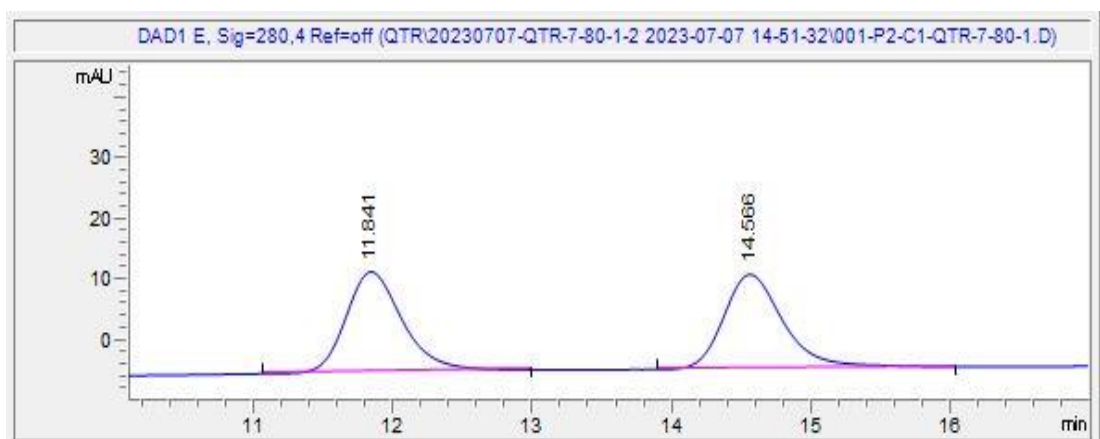

| # | 时间     | 峰面积   | 峰高   | 峰宽     | 峰面积 %  | 对称因子  | 类型 | Type |
|---|--------|-------|------|--------|--------|-------|----|------|
| 1 | 11.841 | 475.7 | 16.7 | 0.4296 | 50.281 | 0.756 | BB | BB   |
| 2 | 14.566 | 470.3 | 15.7 | 0.4534 | 49.719 | 0.73  | BB | BB   |

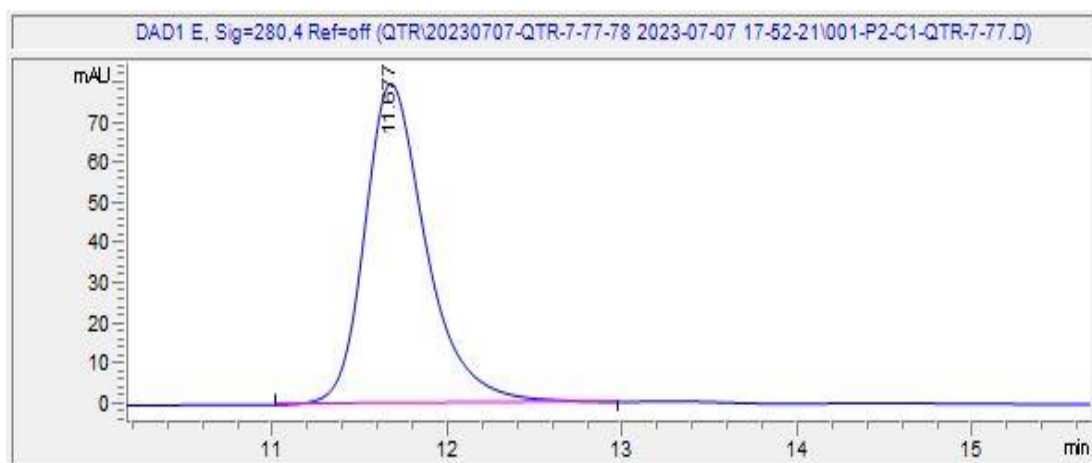

| # | 时间     | 峰面积    | 峰高   | 峰宽     | 峰面积 %   | 对称因子  | 类型 | Type |
|---|--------|--------|------|--------|---------|-------|----|------|
| 1 | 11.677 | 1961.9 | 79.8 | 0.3707 | 100.000 | 0.697 | BB | BB   |

### Heterohelicene 6a

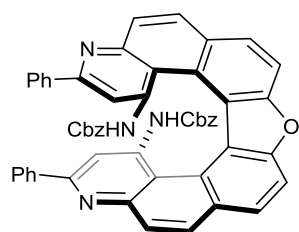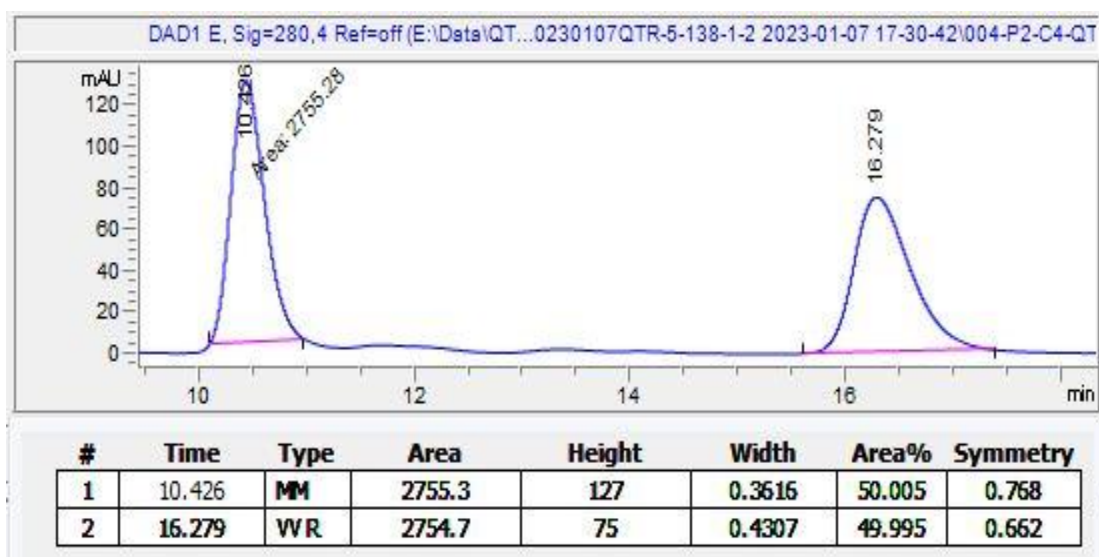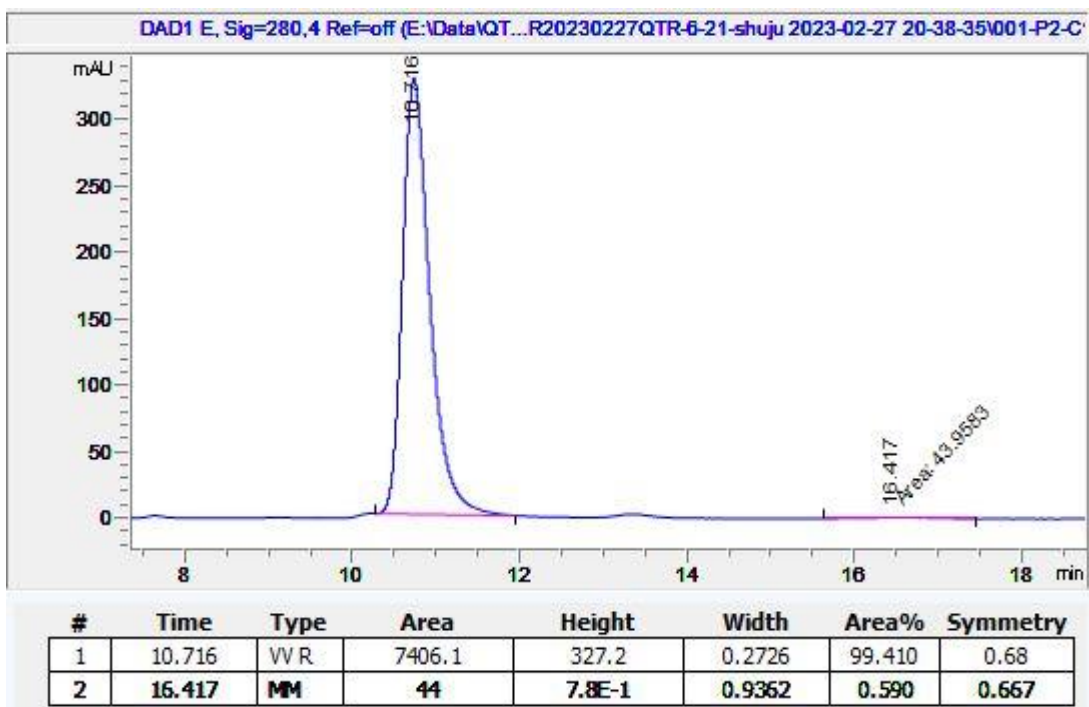

### Heterohelicene 6b

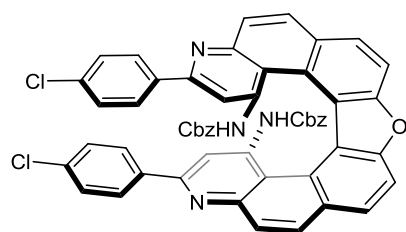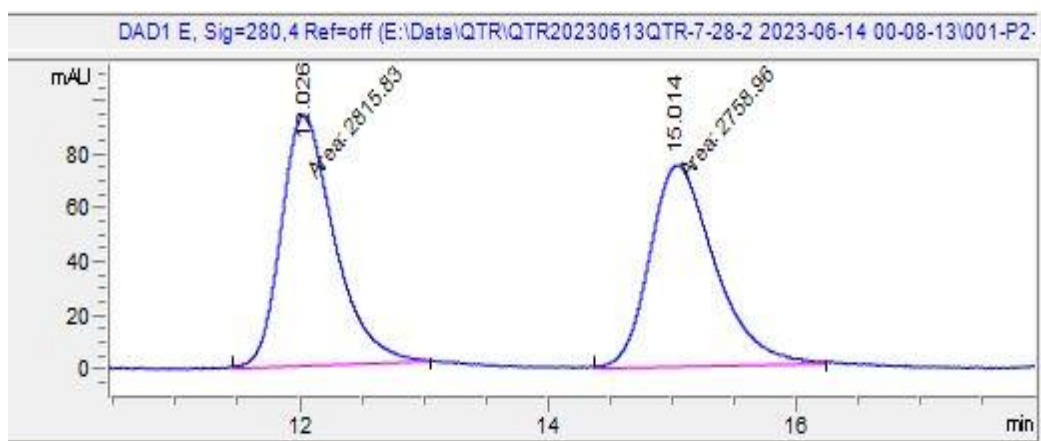

| # | Time   | Type | Area   | Height | Width  | Area%  | Symmetry |
|---|--------|------|--------|--------|--------|--------|----------|
| 1 | 12.026 | MM   | 2815.8 | 93.5   | 0.5018 | 50.510 | 0.721    |
| 2 | 15.014 | MM   | 2759   | 75     | 0.613  | 49.490 | 0.621    |

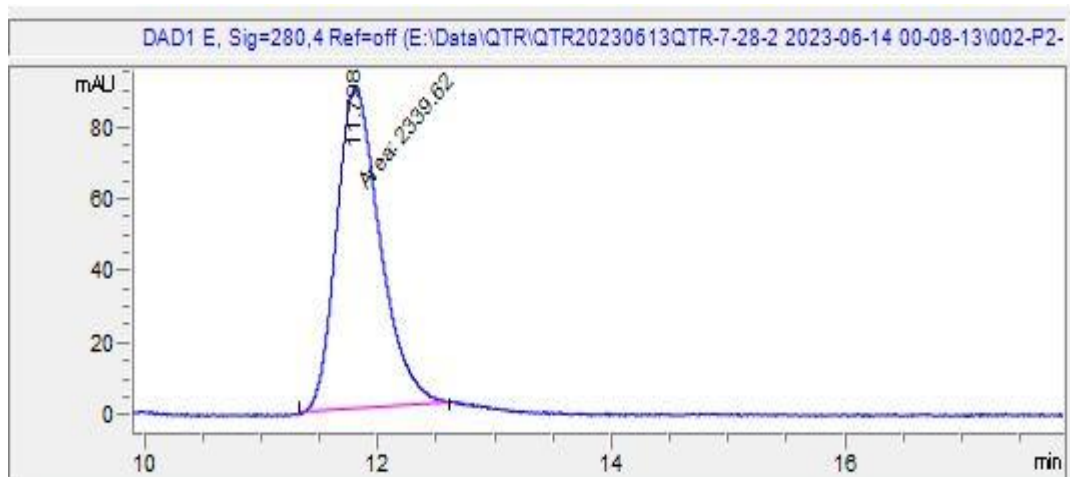

| # | Time   | Type | Area   | Height | Width  | Area%   | Symmetry |
|---|--------|------|--------|--------|--------|---------|----------|
| 1 | 11.798 | MM   | 2339.6 | 89.3   | 0.4367 | 100.000 | 0.721    |



### Heterohelicene 6c

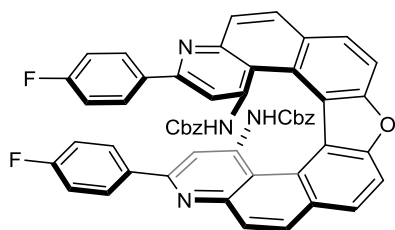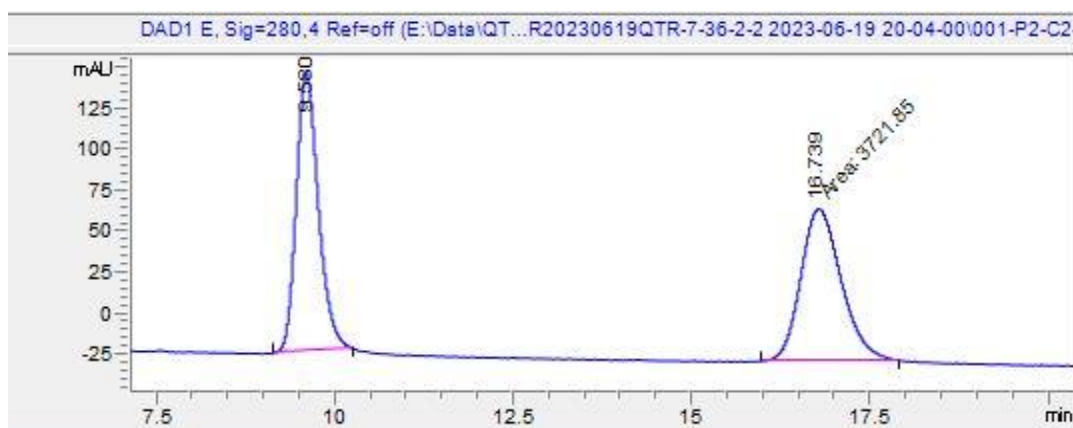

| # | Time   | Type | Area   | Height | Width  | Area%  | Symmetry |
|---|--------|------|--------|--------|--------|--------|----------|
| 1 | 9.58   | VVR  | 3685.6 | 170.2  | 0.2552 | 49.755 | 0.758    |
| 2 | 16.739 | MM   | 3721.9 | 93.3   | 0.6649 | 50.245 | 0.708    |

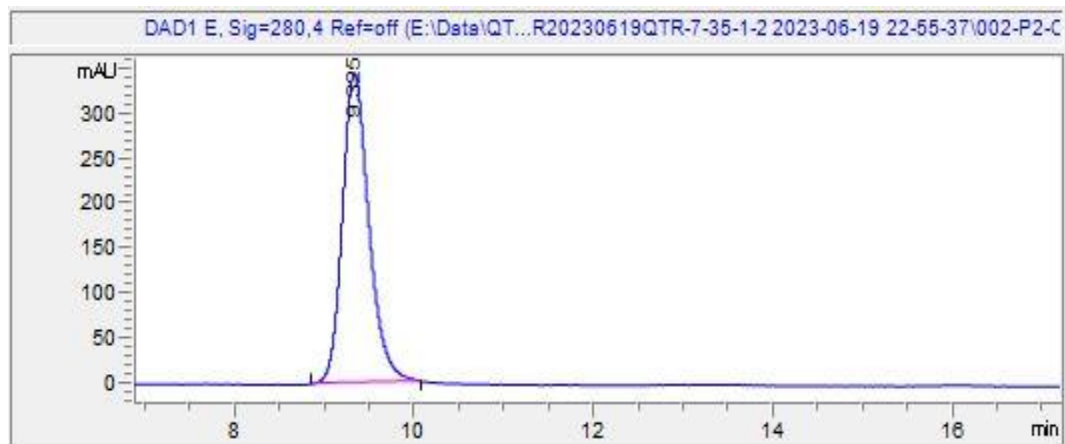

| # | Time  | Type | Area   | Height | Width  | Area%   | Symmetry |
|---|-------|------|--------|--------|--------|---------|----------|
| 1 | 9.325 | VVR  | 7051.1 | 343.3  | 0.2432 | 100.000 | 0.766    |

### Heterohelicene 6d

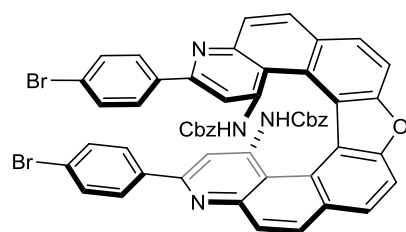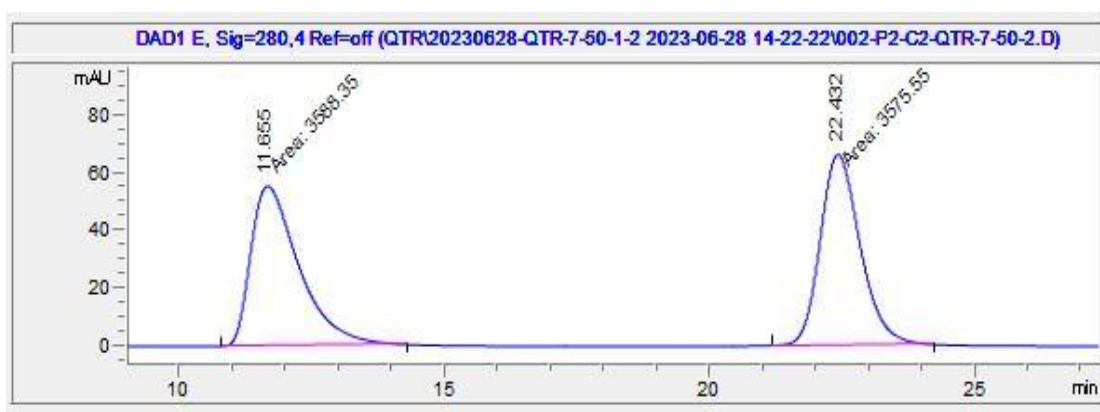

| # | 时间     | 峰面积    | 峰高   | 峰宽     | 峰面积 %  | 对称因子  | 类型 | Type |
|---|--------|--------|------|--------|--------|-------|----|------|
| 1 | 11.655 | 3588.4 | 56.1 | 1.0664 | 50.089 | 0.517 | MM | MM   |
| 2 | 22.432 | 3575.6 | 67.2 | 0.8873 | 49.911 | 0.777 | MM | MM   |

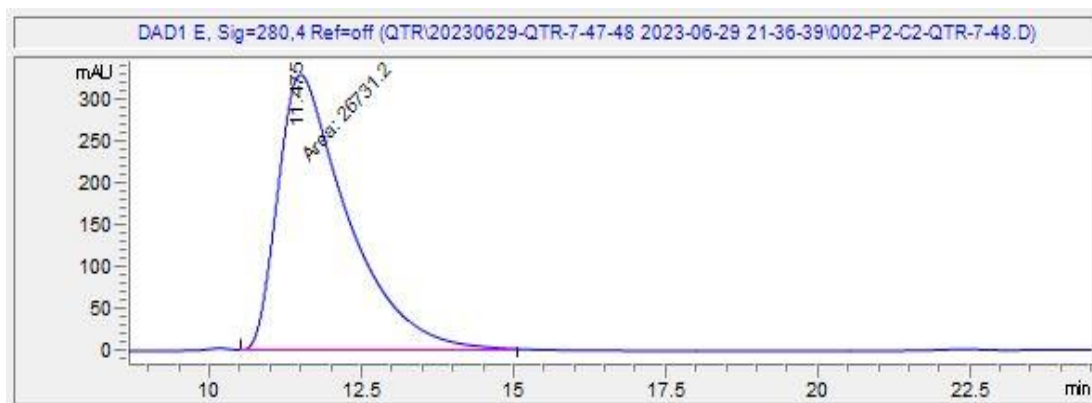

| # | 时间     | 峰面积     | 峰高    | 峰宽     | 峰面积 %   | 对称因子  | 类型 | Type |
|---|--------|---------|-------|--------|---------|-------|----|------|
| 1 | 11.475 | 26731.2 | 330.9 | 1.3463 | 100.000 | 0.462 | MM | MM   |



### Heterohelicene 6e

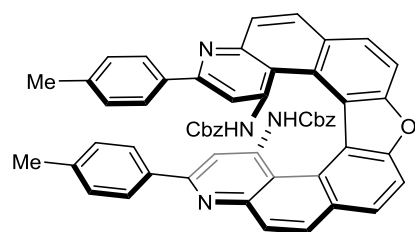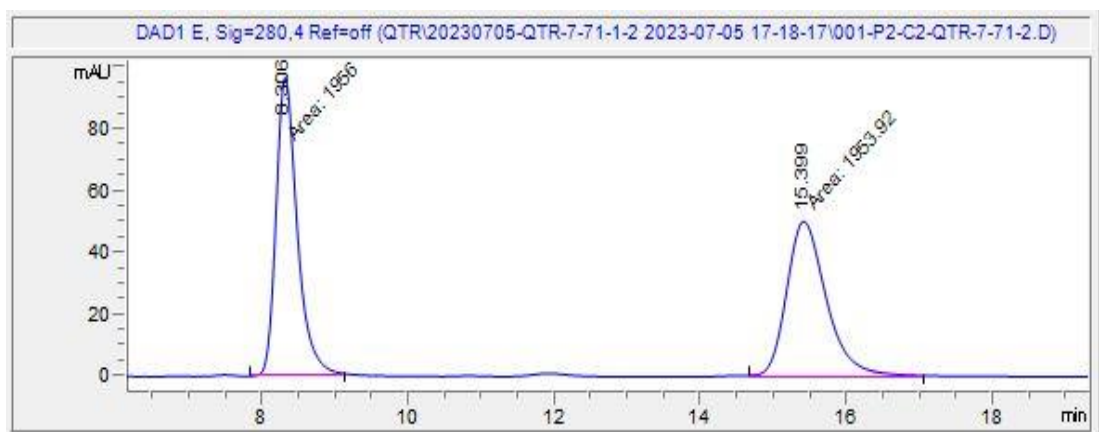

| # | 时间     | 峰面积    | 峰高   | 峰宽     | 峰面积 %  | 对称因子  | 类型 | Type |
|---|--------|--------|------|--------|--------|-------|----|------|
| 1 | 8.306  | 1956   | 96.9 | 0.3363 | 50.027 | 0.718 | MM | MM   |
| 2 | 15.399 | 1953.9 | 50.7 | 0.6421 | 49.973 | 0.722 | MM | MM   |

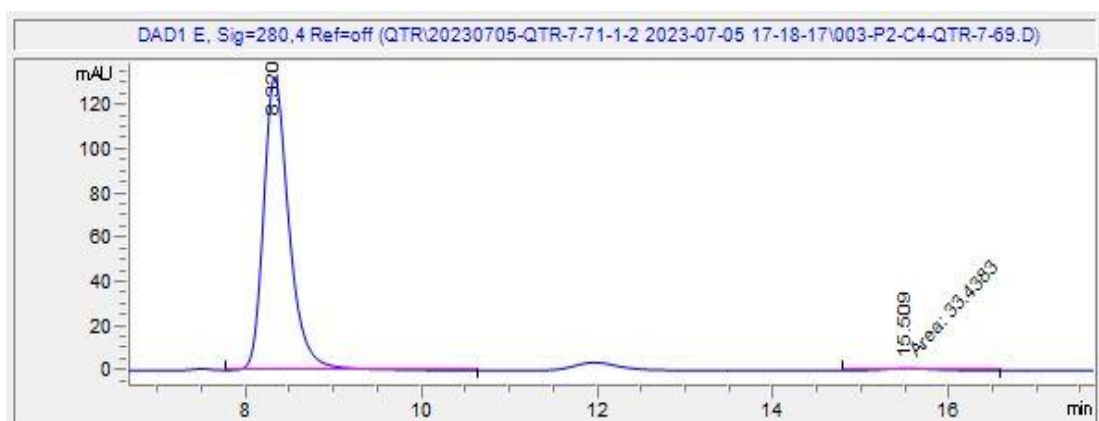

| # | 时间     | 峰面积  | 峰高     | 峰宽     | 峰面积 %  | 对称因子  | 类型 | Type |
|---|--------|------|--------|--------|--------|-------|----|------|
| 1 | 8.32   | 2669 | 132.3  | 0.3074 | 98.763 | 0.696 | BB | BB   |
| 2 | 15.509 | 33.4 | 8.9E-1 | 0.6275 | 1.237  | 0.811 | MM | MM   |

### Heterohelicene 6f

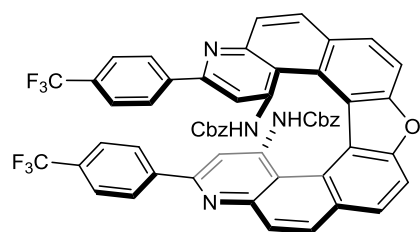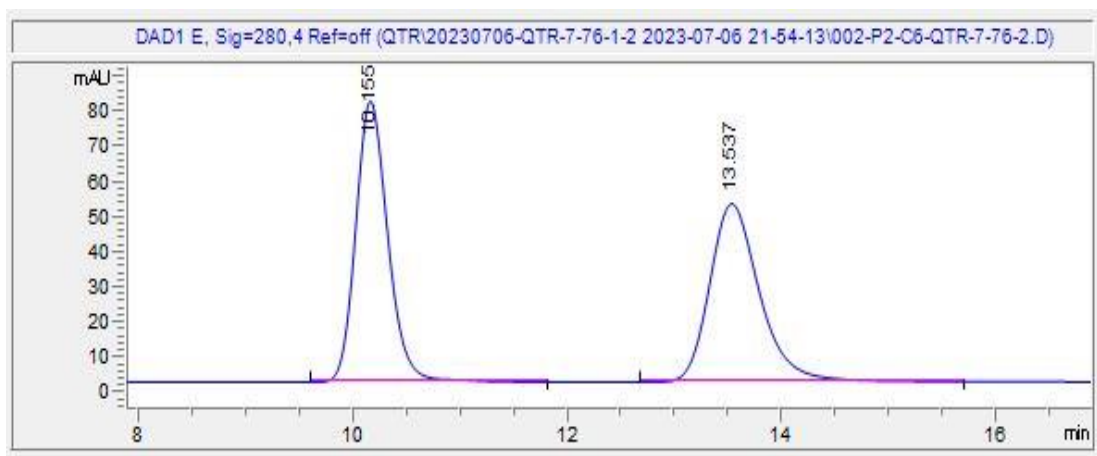

| # | 时间     | 峰面积    | 峰高   | 峰宽     | 峰面积 %  | 对称因子  | 类型 | Type |
|---|--------|--------|------|--------|--------|-------|----|------|
| 1 | 10.155 | 1691.1 | 80.7 | 0.3226 | 50.407 | 0.791 | BB | BB   |
| 2 | 13.537 | 1663.8 | 51.2 | 0.4953 | 49.593 | 0.742 | BB | BB   |

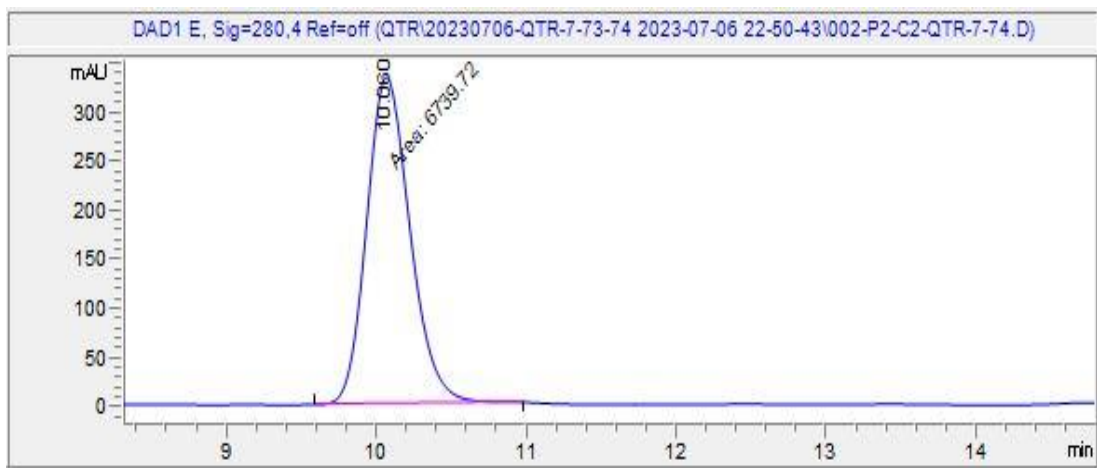

| # | 时间    | 峰面积    | 峰高    | 峰宽     | 峰面积 %   | 对称因子  | 类型 | Type |
|---|-------|--------|-------|--------|---------|-------|----|------|
| 1 | 10.06 | 6739.7 | 333.5 | 0.3368 | 100.000 | 0.808 | MM | MM   |

### Heterohelicene 6g

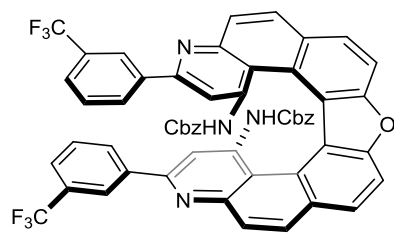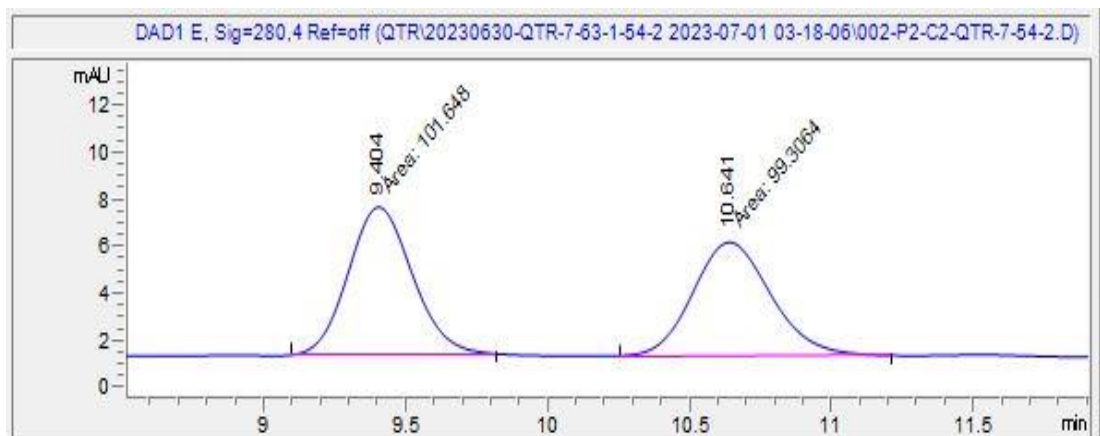

| # | 时间     | 峰面积   | 峰高  | 峰宽     | 峰面积 %  | 对称因子  | 类型 | Type |
|---|--------|-------|-----|--------|--------|-------|----|------|
| 1 | 9.404  | 101.6 | 6.4 | 0.2654 | 50.583 | 0.875 | MM | MM   |
| 2 | 10.641 | 99.3  | 5   | 0.3322 | 49.417 | 0.863 | MM | MM   |

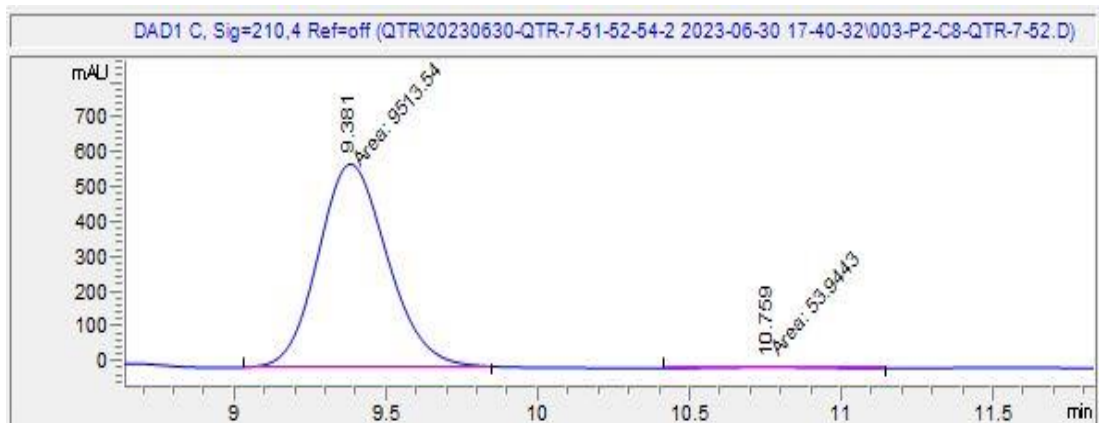

| # | 时间     | 峰面积    | 峰高    | 峰宽     | 峰面积 %  | 对称因子  | 类型 | Type |
|---|--------|--------|-------|--------|--------|-------|----|------|
| 1 | 9.381  | 9513.5 | 589.6 | 0.2689 | 99.436 | 0.844 | MM | MM   |
| 2 | 10.759 | 53.9   | 2.8   | 0.3227 | 0.564  | 0.937 | MM |      |

### Heterohelicene 6h

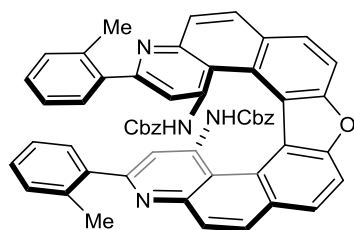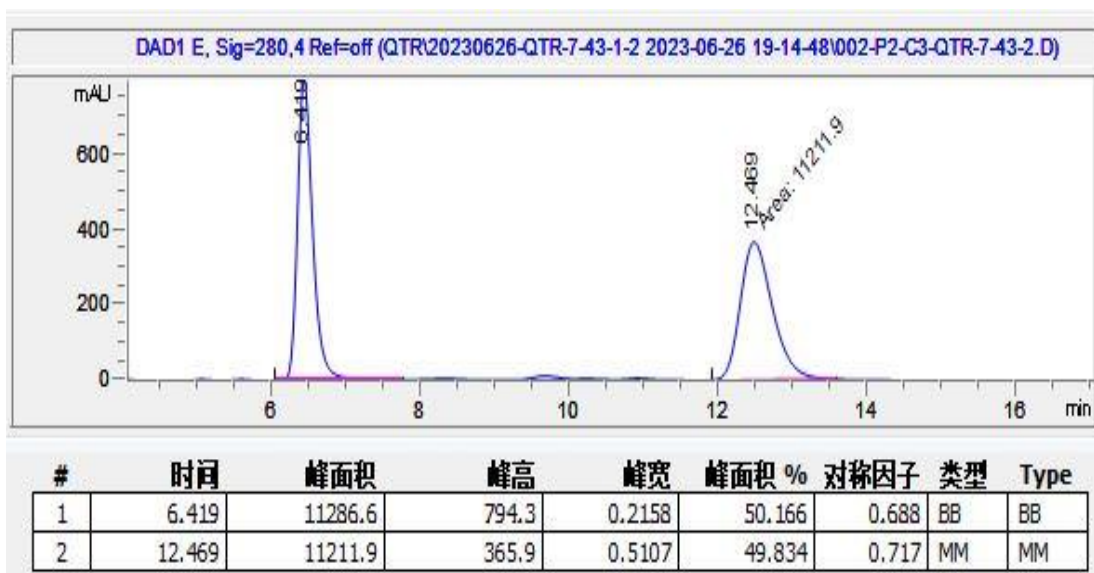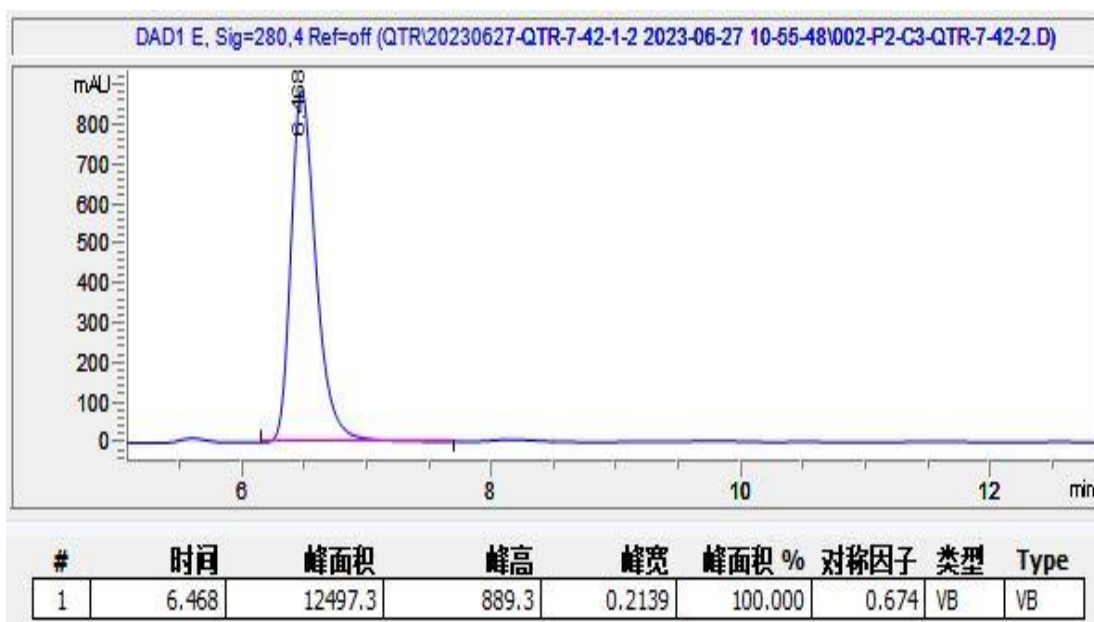

### Heterohelicene 6i

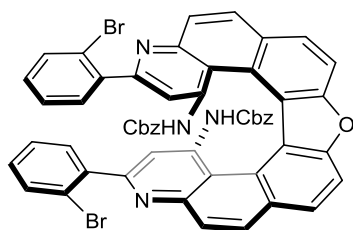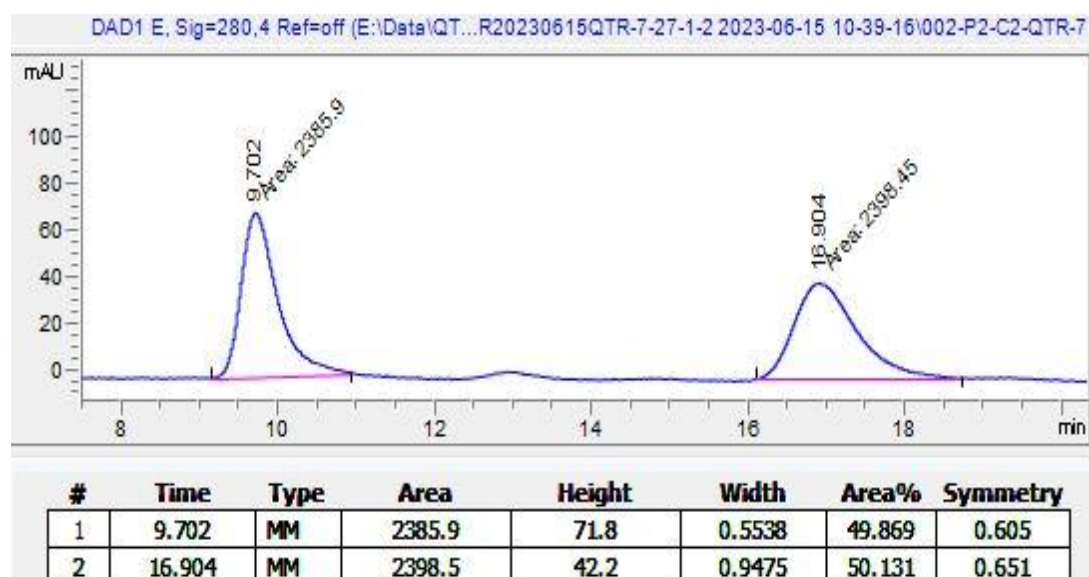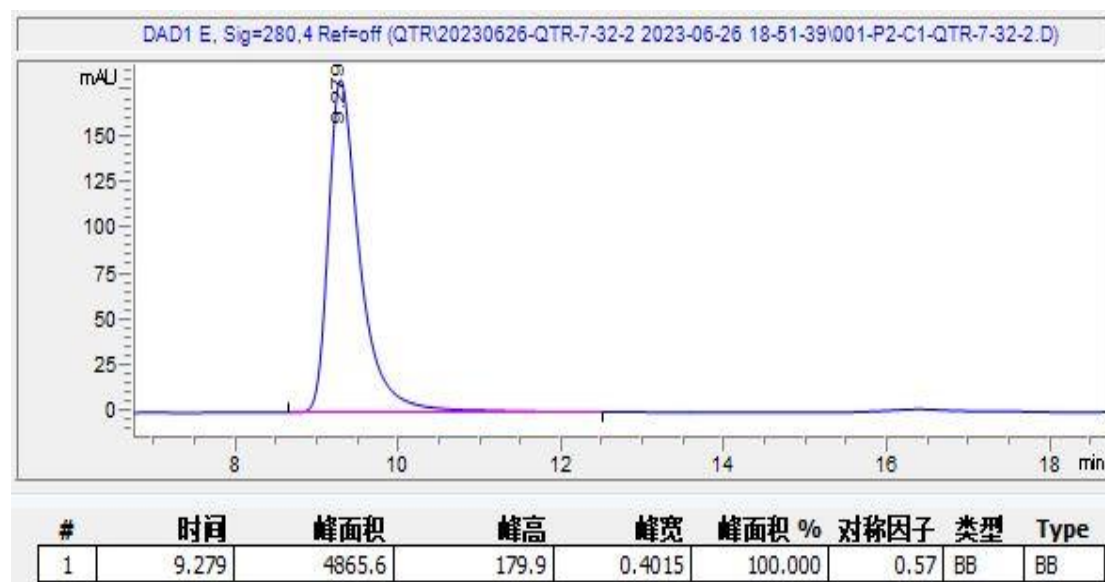

### Heterohelicene 6j

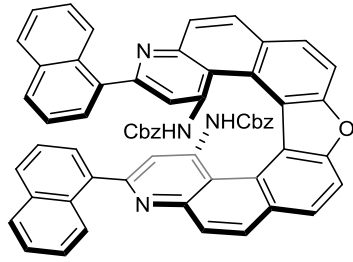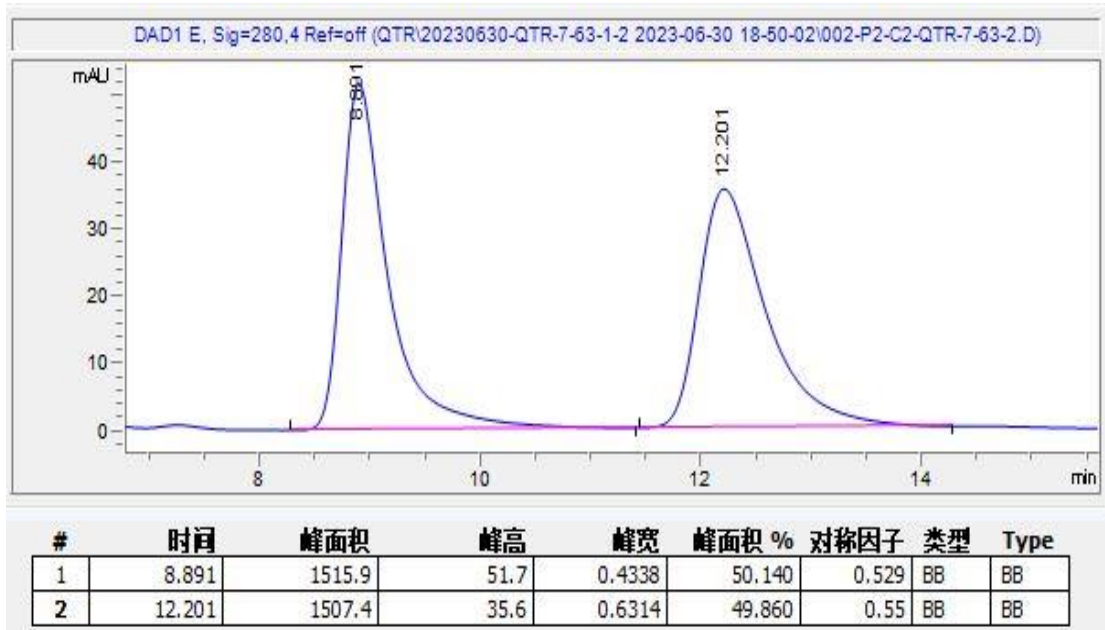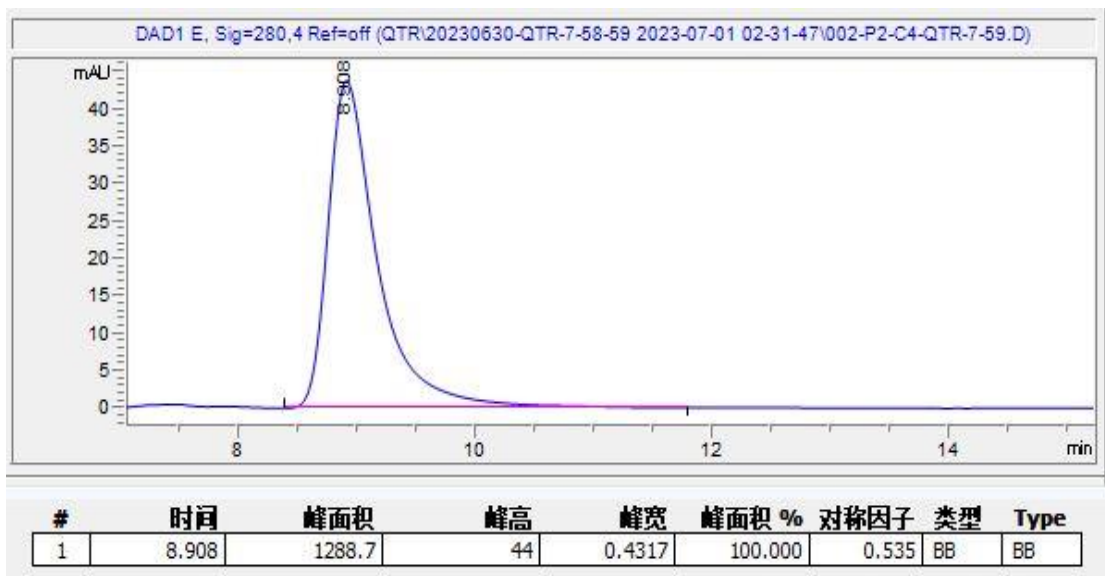



### Heterohelicene 6k

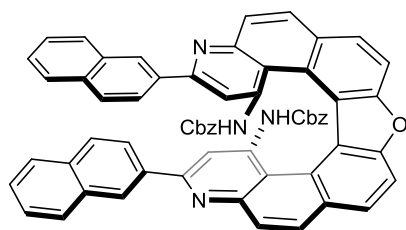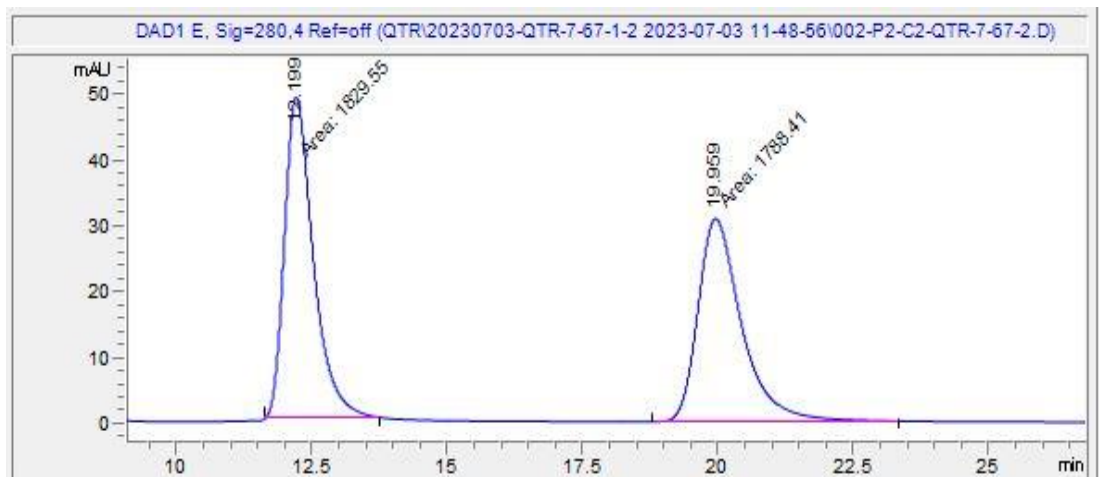

| # | 时间     | 峰面积    | 峰高   | 峰宽     | 峰面积 %  | 对称因子  | 类型 | Type |
|---|--------|--------|------|--------|--------|-------|----|------|
| 1 | 12.199 | 1829.6 | 48.9 | 0.6235 | 50.569 | 0.654 | MM | MM   |
| 2 | 19.959 | 1788.4 | 31   | 0.9611 | 49.431 | 0.64  | MM | MM   |

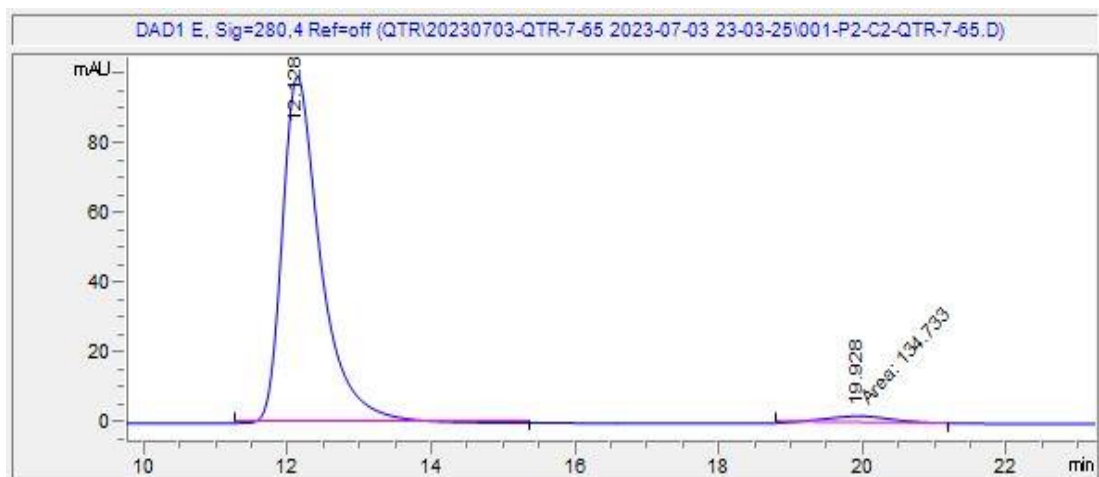

| # | 时间     | 峰面积    | 峰高   | 峰宽     | 峰面积 %  | 对称因子  | 类型 | Type |
|---|--------|--------|------|--------|--------|-------|----|------|
| 1 | 12.128 | 3730.8 | 99.7 | 0.5584 | 96.514 | 0.585 | BB | BB   |
| 2 | 19.928 | 134.7  | 2    | 1.1173 | 3.486  | 1.063 | MM | MM   |

### Heterohelicene 6l

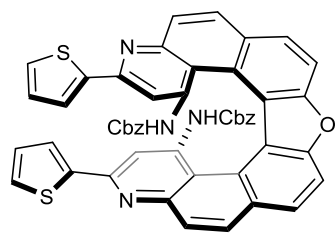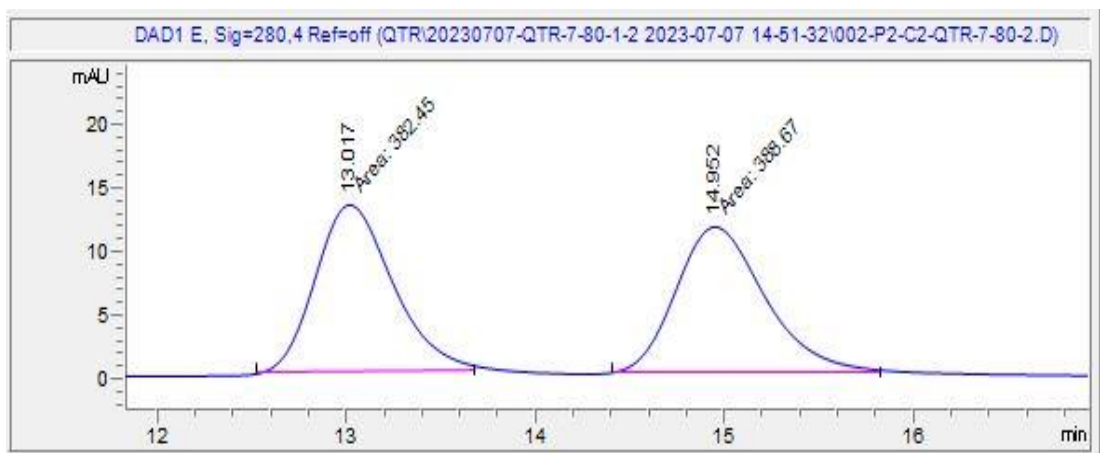

| # | 时间     | 峰面积   | 峰高   | 峰宽     | 峰面积 %  | 对称因子  | 类型 | Type |
|---|--------|-------|------|--------|--------|-------|----|------|
| 1 | 13.017 | 382.4 | 13.3 | 0.4797 | 49.597 | 0.785 | MM | MM   |
| 2 | 14.952 | 388.7 | 11.7 | 0.556  | 50.403 | 0.758 | MM |      |

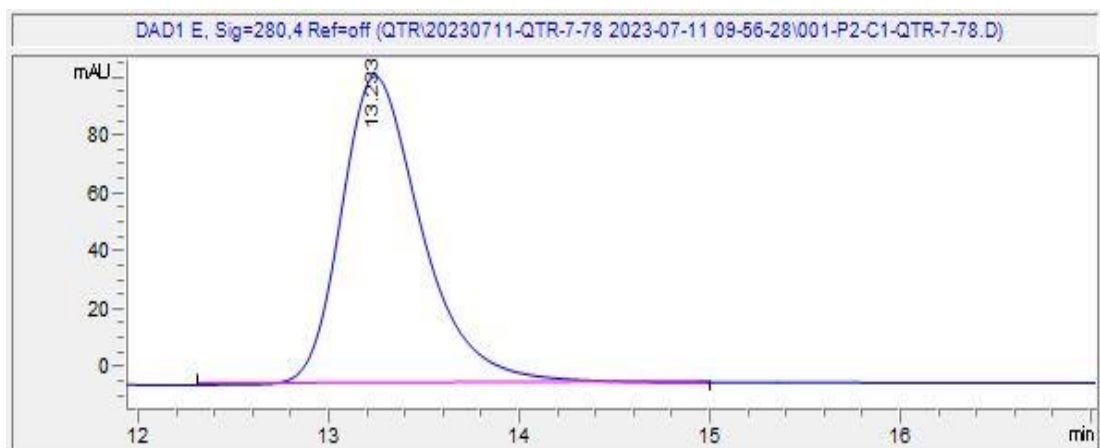

| # | 时间     | 峰面积    | 峰高    | 峰宽    | 峰面积 %   | 对称因子  | 类型 | Type |
|---|--------|--------|-------|-------|---------|-------|----|------|
| 1 | 13.233 | 3145.6 | 106.4 | 0.451 | 100.000 | 0.676 | BB | BB   |



### Heterohelicene 7a

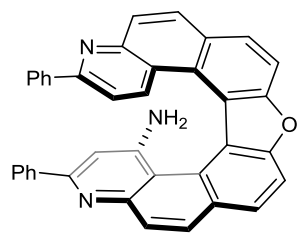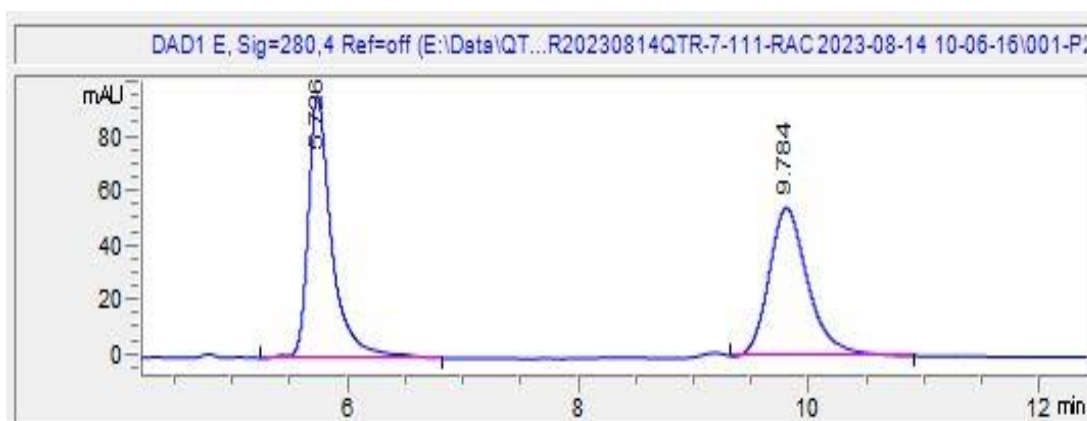

| # | Time  | Type | Area   | Height | Width  | Area%  | Symmetry |
|---|-------|------|--------|--------|--------|--------|----------|
| 1 | 5.726 | BB   | 1371.4 | 96.8   | 0.2078 | 51.667 | 0.6      |
| 2 | 9.784 | BB   | 1282.9 | 54.6   | 0.3141 | 48.333 | 0.756    |

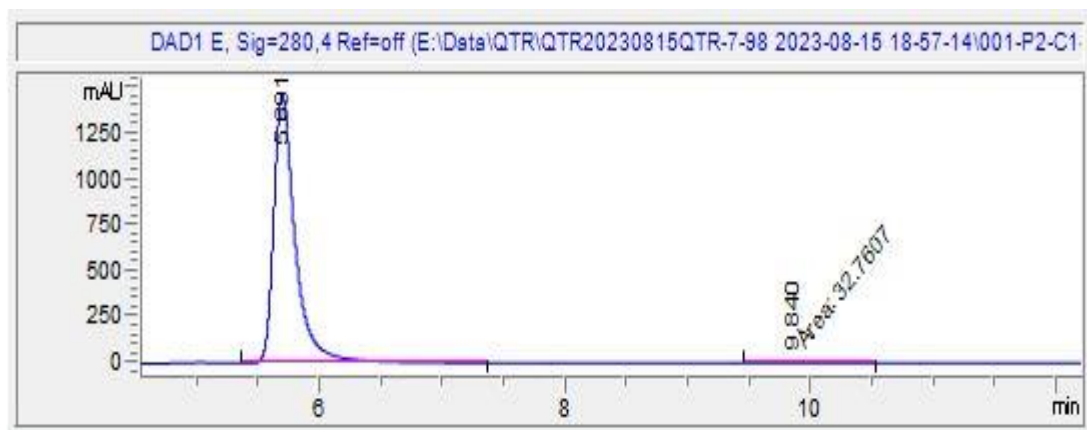

| # | Time  | Type | Area    | Height | Width  | Area%  | Symmetry |
|---|-------|------|---------|--------|--------|--------|----------|
| 1 | 5.691 | BB   | 18105.6 | 1479.4 | 0.1818 | 99.819 | 0.563    |
| 2 | 9.84  | MM   | 32.8    | 1.4    | 0.3792 | 0.181  | 0.645    |

### Heterohelicene 8a

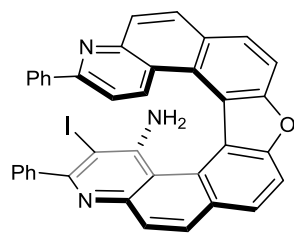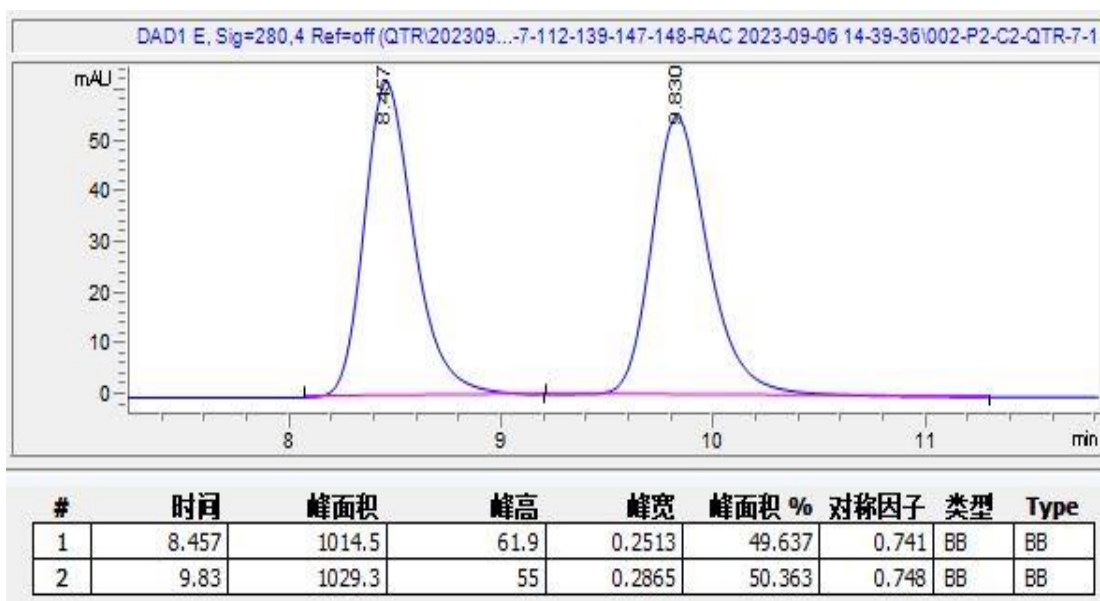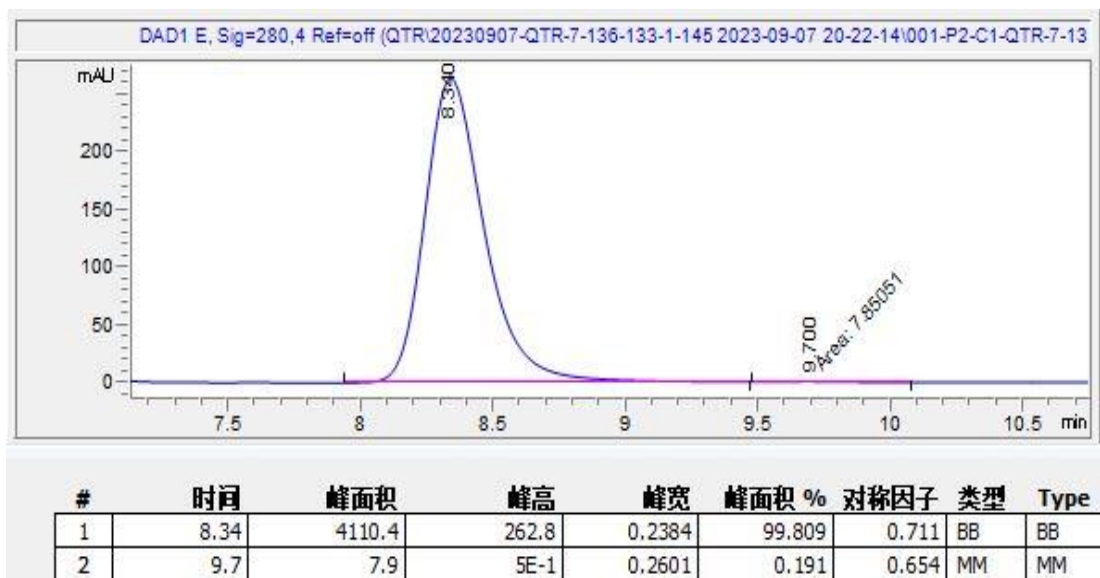

### Heterohelicene 9a

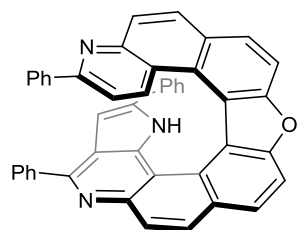

DAD1 E, Sig=280,4 Ref=off (QTR\20230906-QTR-7-147-148-RAC 2023-09-07 01-04-02\001-P2-C3-QTR-7-147.

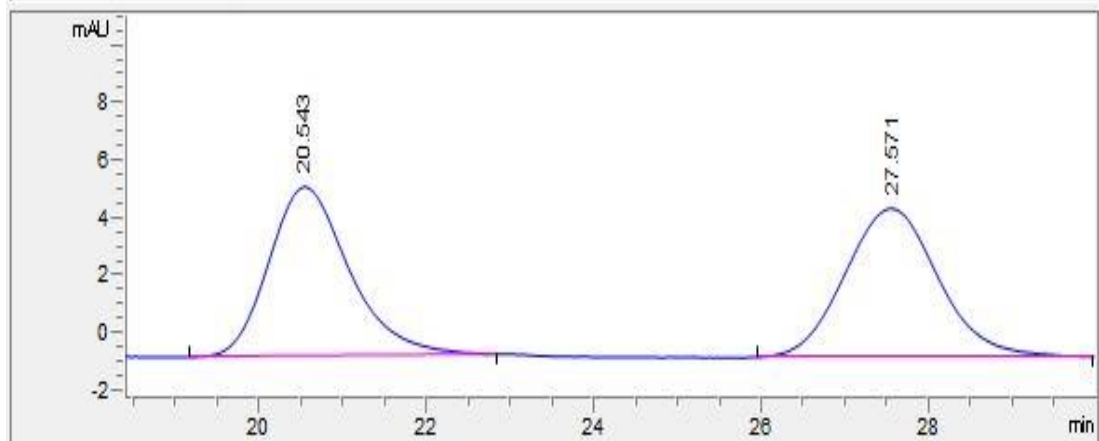

| # | 时间     | 峰面积   | 峰高  | 峰宽     | 峰面积 %  | 对称因子  | 类型 | Type |
|---|--------|-------|-----|--------|--------|-------|----|------|
| 1 | 20.543 | 396.7 | 5.9 | 0.9119 | 49.543 | 0.774 | BB | BB   |
| 2 | 27.571 | 404.1 | 5.2 | 0.9414 | 50.457 | 0.983 | BB | BB   |

DAD1 E, Sig=280,4 Ref=off (QTR\20230907-QTR-7-136-133-1-145 2023-09-07 17-08-08\002-P2-C2-QTR-7-133

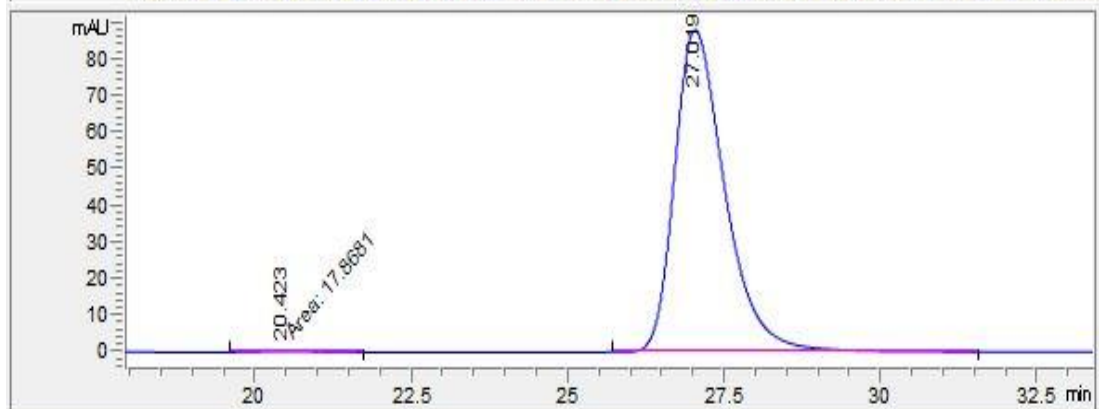

| # | 时间     | 峰面积    | 峰高     | 峰宽     | 峰面积 %  | 对称因子  | 类型 | Type |
|---|--------|--------|--------|--------|--------|-------|----|------|
| 1 | 20.423 | 17.9   | 2.8E-1 | 1.0476 | 0.363  | 0.655 | MM | MM   |
| 2 | 27.019 | 4900.4 | 87.4   | 0.8503 | 99.637 | 0.64  | BB | BB   |

### Heterohelicene 10a

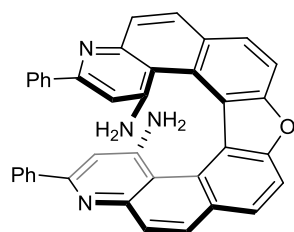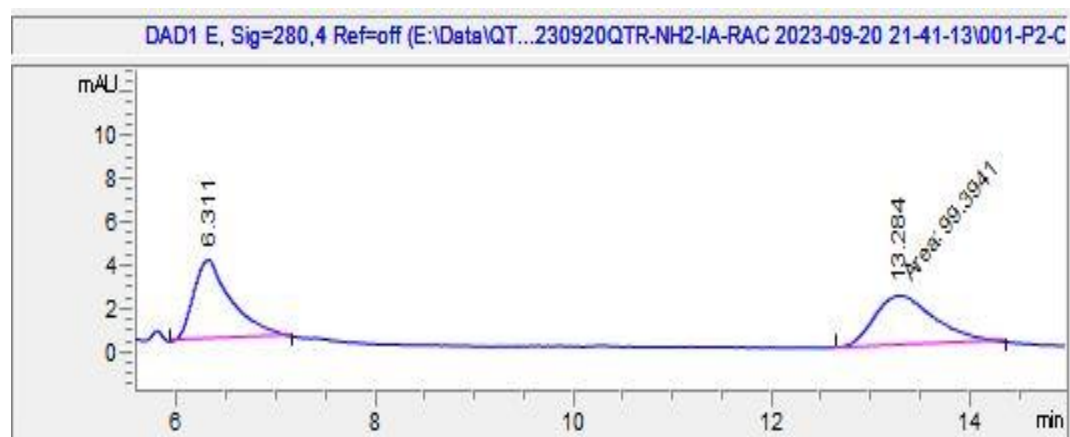

| # | Time   | Type | Area  | Height | Width  | Area%  | Symmetry |
|---|--------|------|-------|--------|--------|--------|----------|
| 1 | 6.311  | BB   | 100.3 | 3.7    | 0.3195 | 50.218 | 0.626    |
| 2 | 13.284 | MM   | 99.4  | 2.3    | 0.711  | 49.782 | 0.678    |

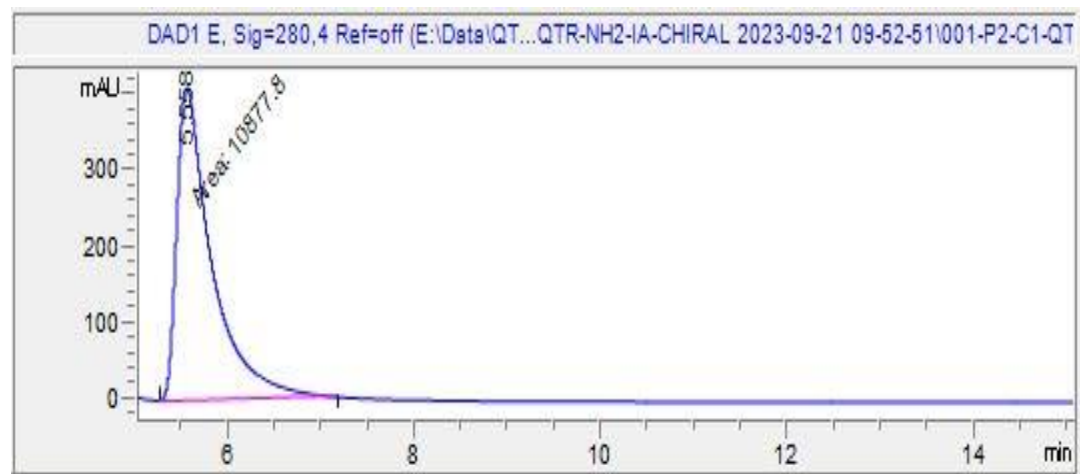

| # | Time  | Type | Area    | Height | Width  | Area%   | Symmetry |
|---|-------|------|---------|--------|--------|---------|----------|
| 1 | 5.558 | MM   | 10877.8 | 412.1  | 0.4399 | 100.000 | 0.393    |

### Heterohelicene 11a

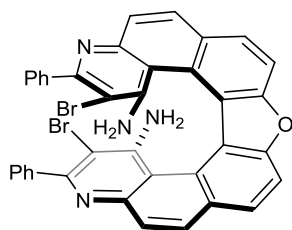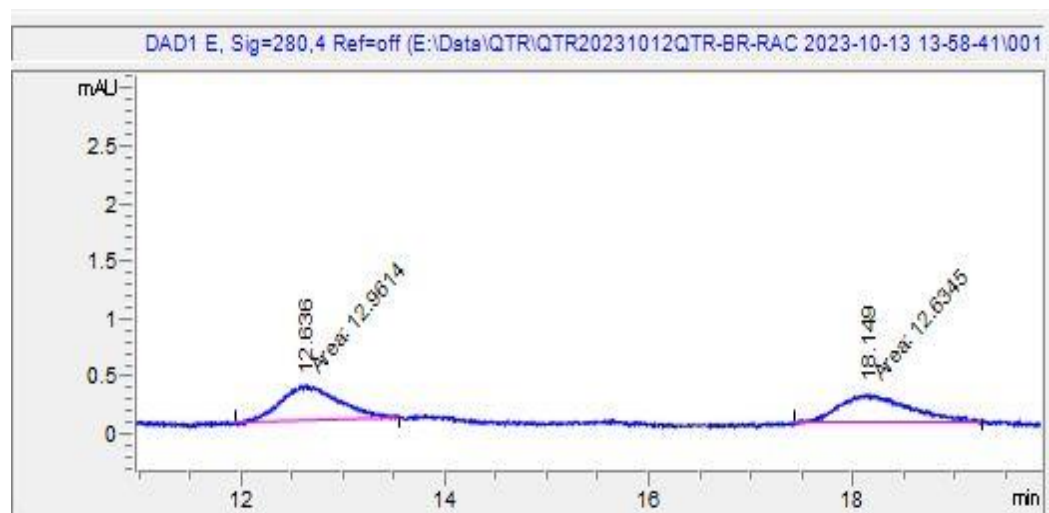

| # | Time   | Type | Area | Height | Width  | Area%  | Symmetry |
|---|--------|------|------|--------|--------|--------|----------|
| 1 | 12.636 | MM   | 13   | 3.2E-1 | 0.6718 | 50.639 | 0.769    |
| 2 | 18.149 | MM   | 12.6 | 2.6E-1 | 0.8156 | 49.361 | 0.662    |

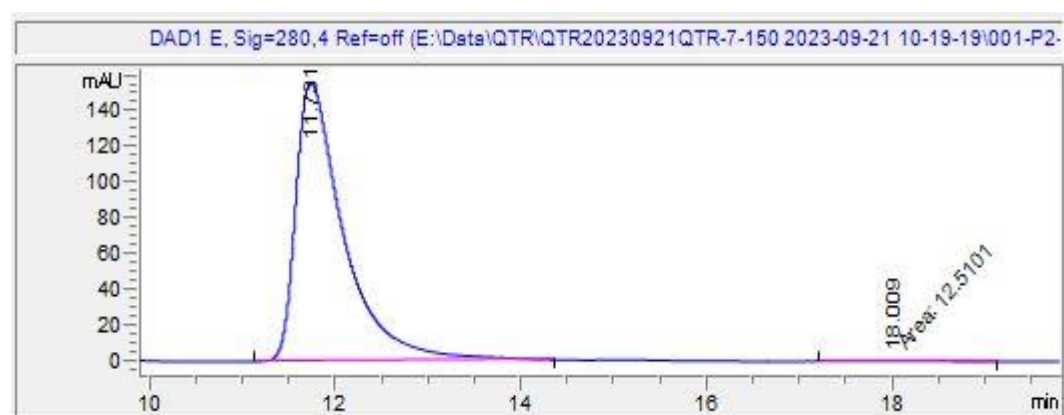

| # | Time   | Type | Area   | Height | Width  | Area%  | Symmetry |
|---|--------|------|--------|--------|--------|--------|----------|
| 1 | 11.731 | BB   | 5590.8 | 155.3  | 0.4769 | 99.777 | 0.424    |
| 2 | 18.009 | MM   | 12.5   | 2.2E-1 | 0.9384 | 0.223  | 0.811    |

# NMR spectra

## dinaphtho[2,1-b:1',2'-d]furan-2,12-diamine (1a)

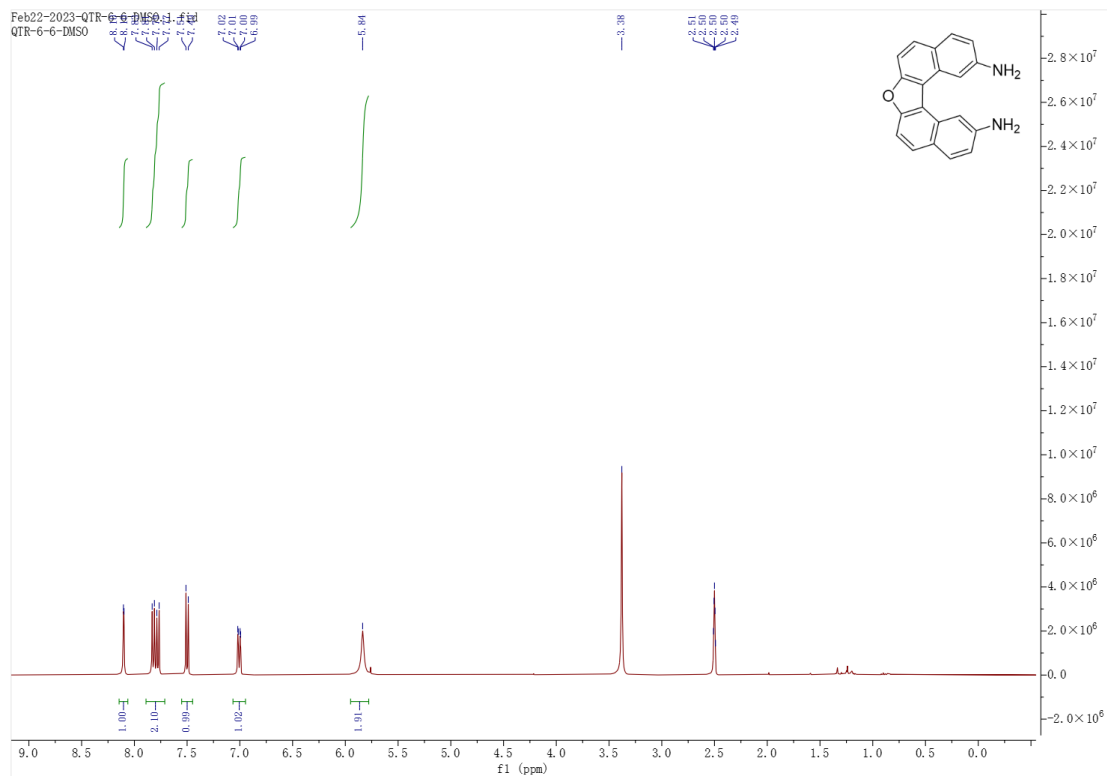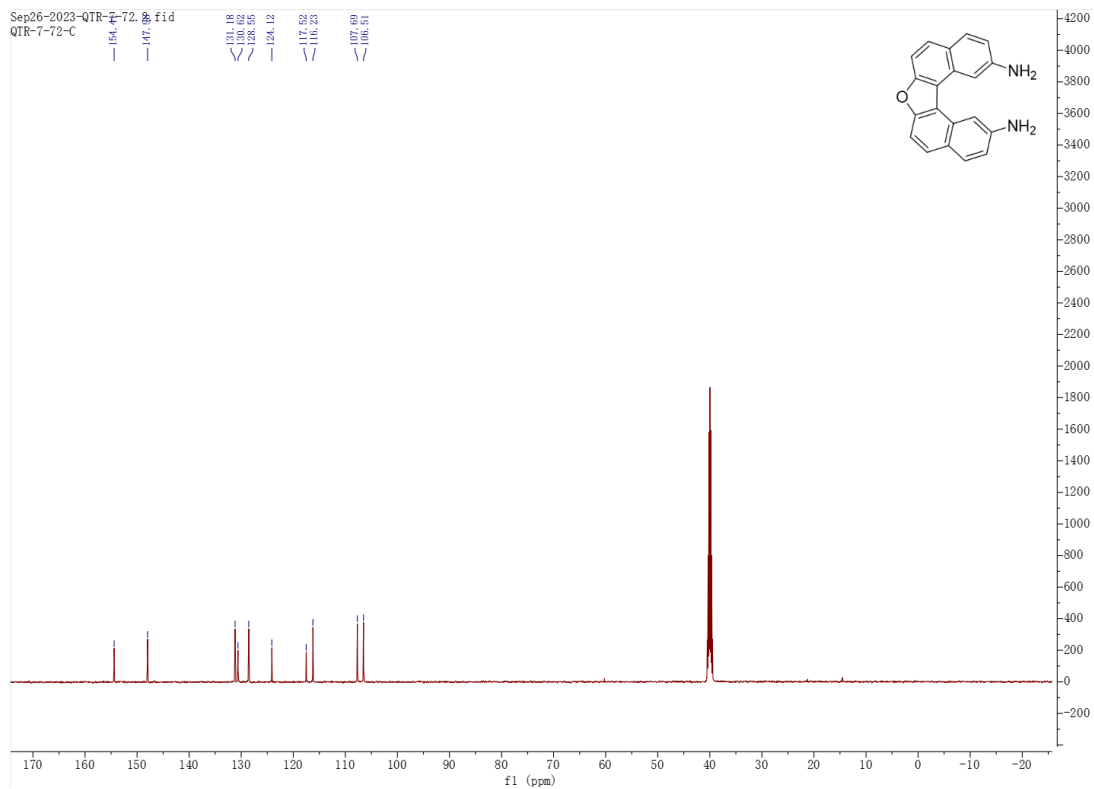

# helicenoid 4a

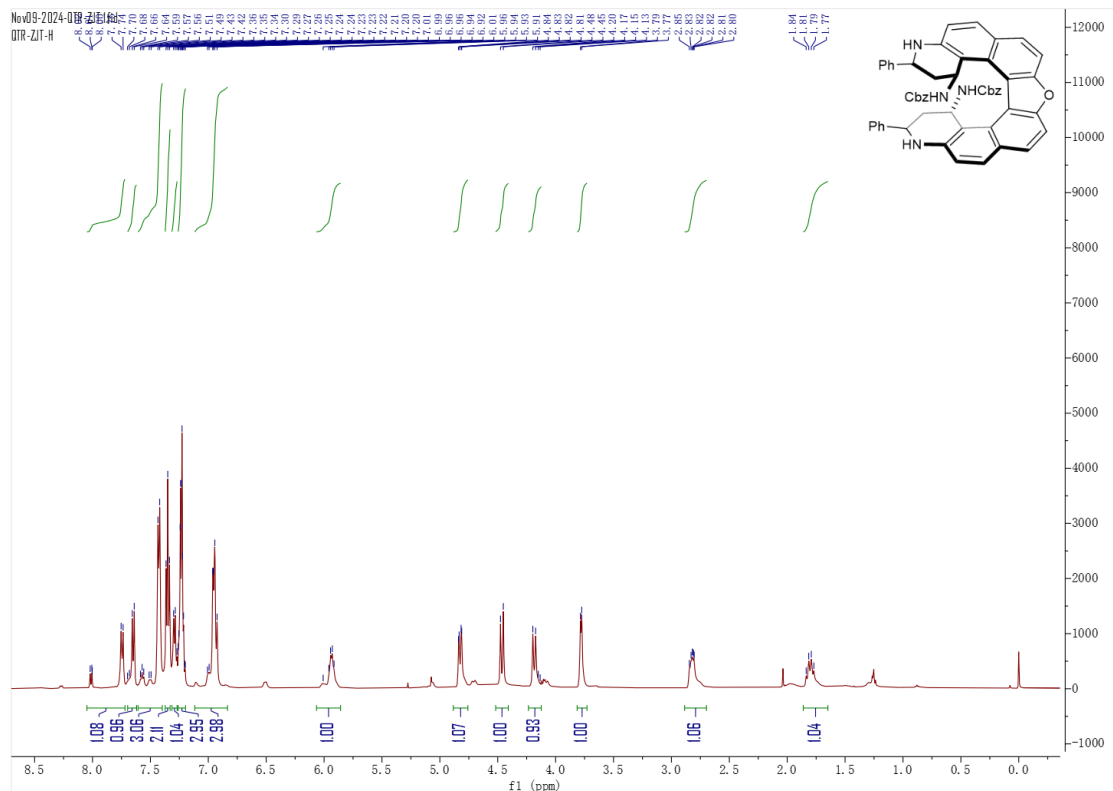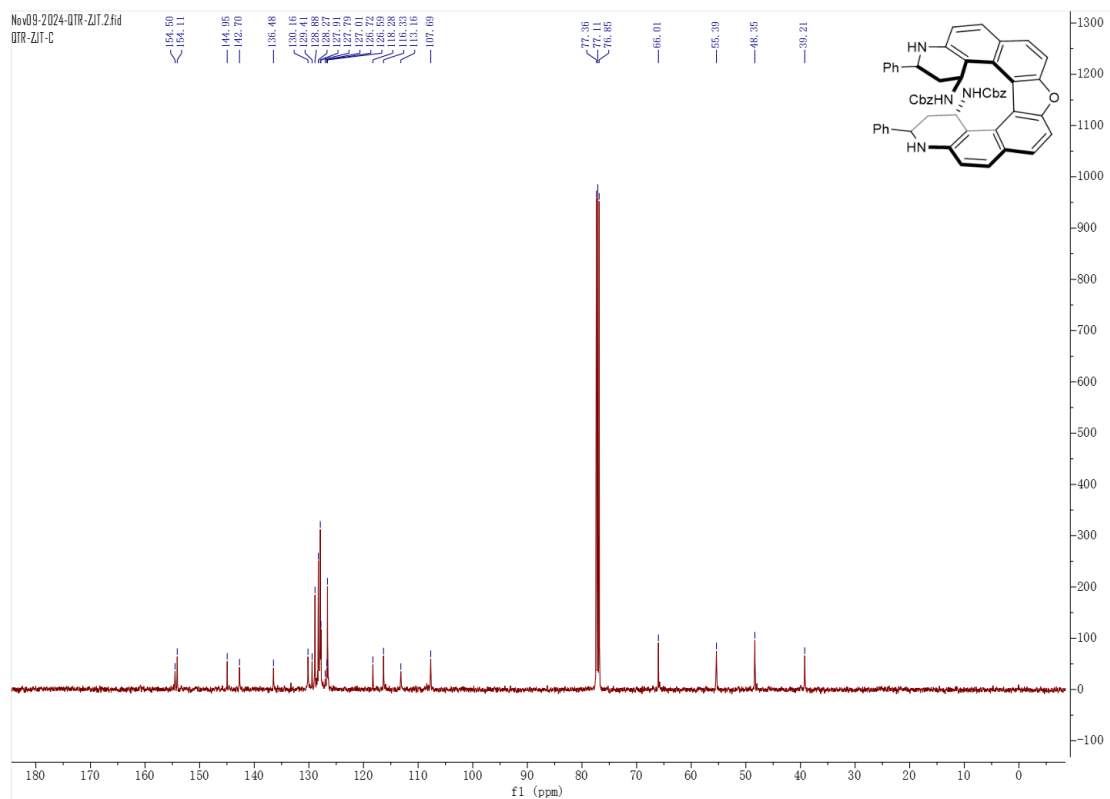



# Helicene 5a

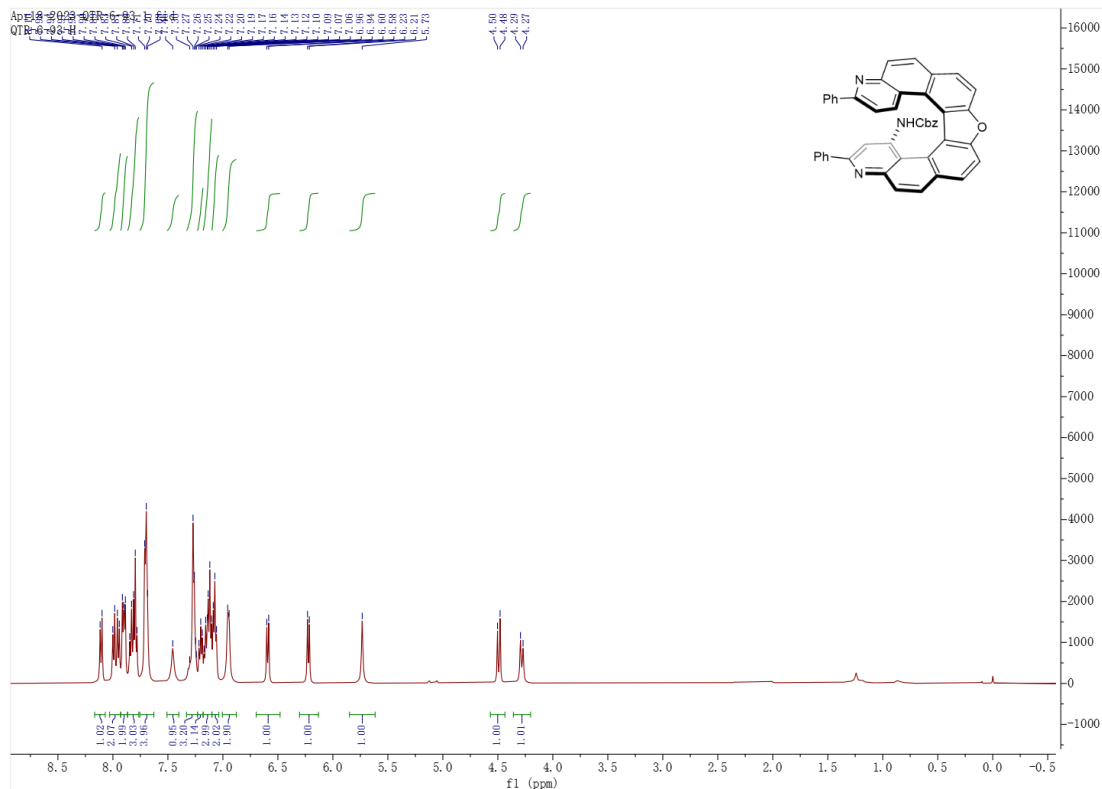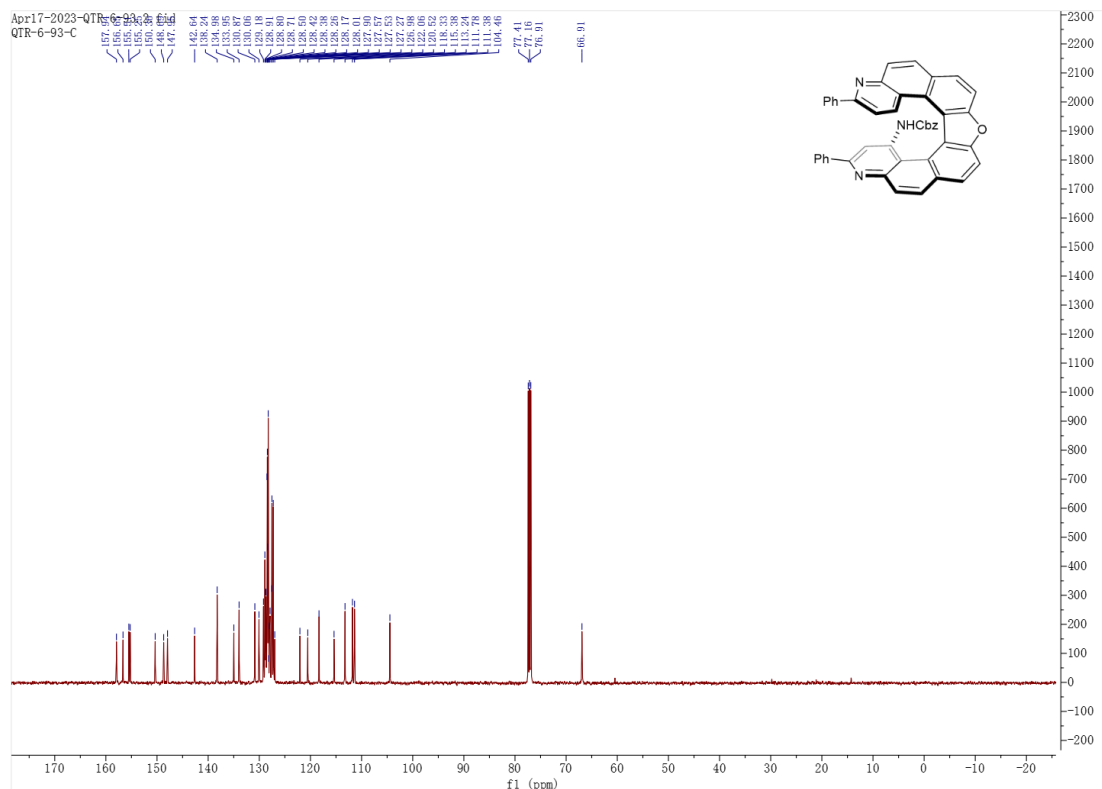



# Helicene 5b

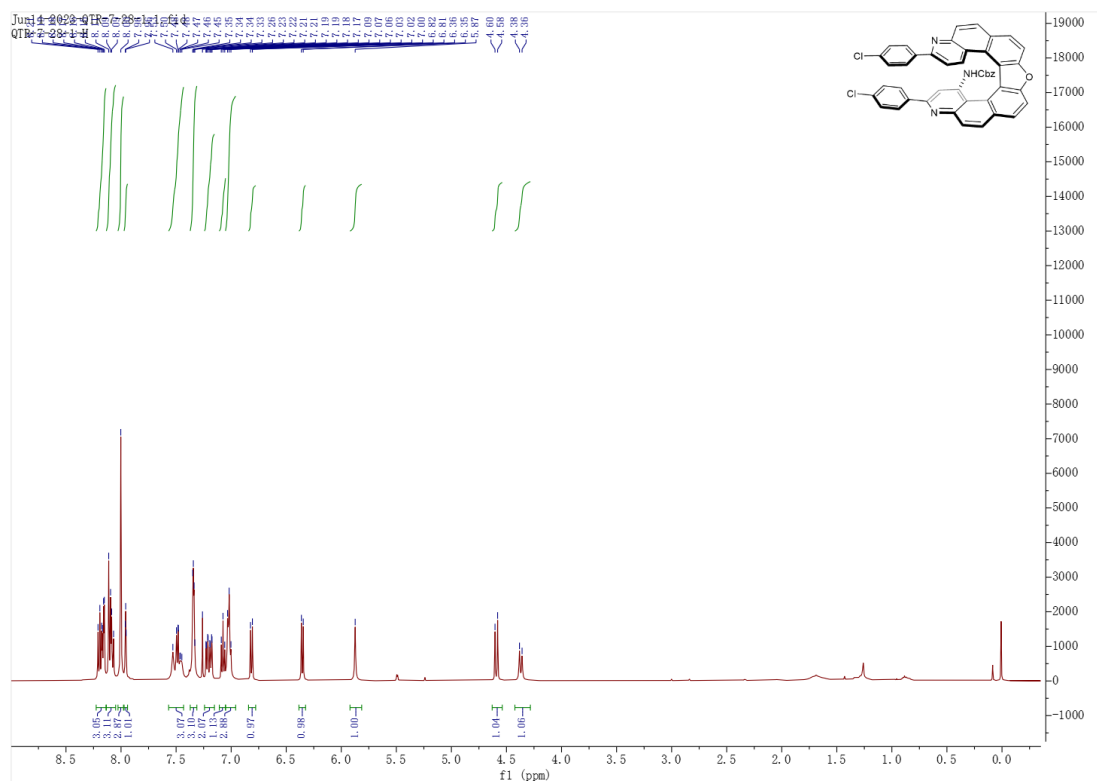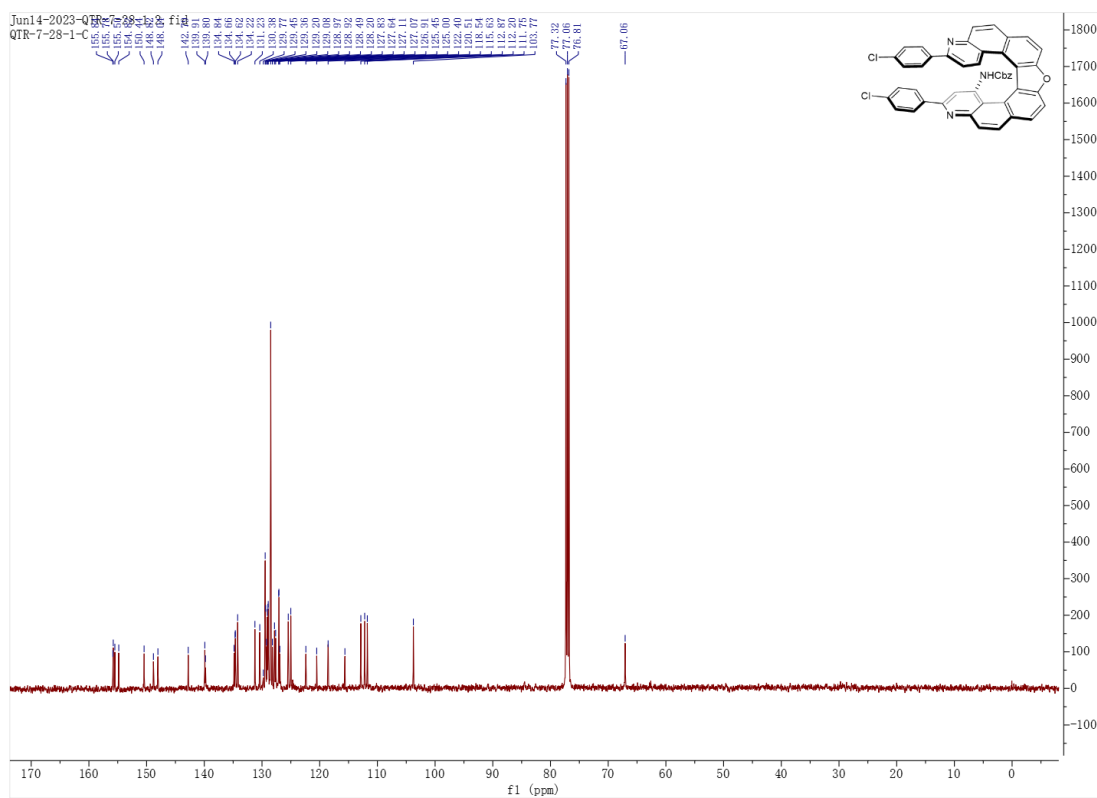

# Helicene 5c

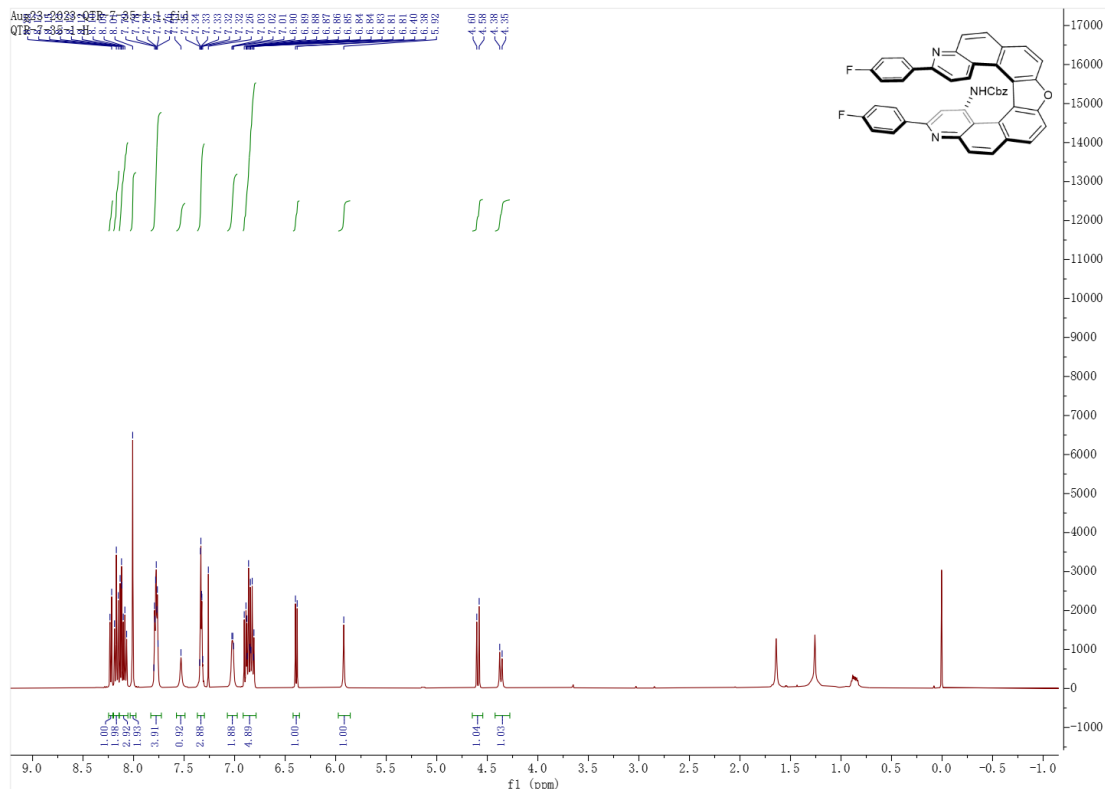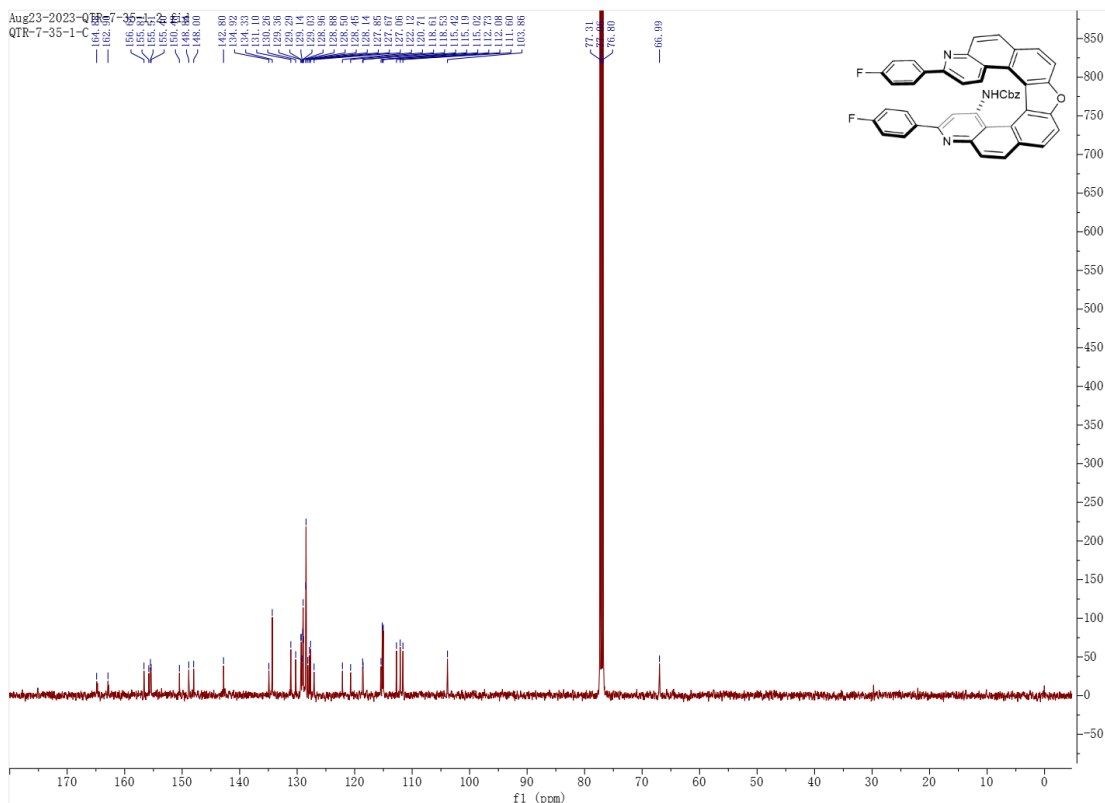

Sep22-2023-QTR-7-35-1.1.fid  
QTR-7-35-1-F

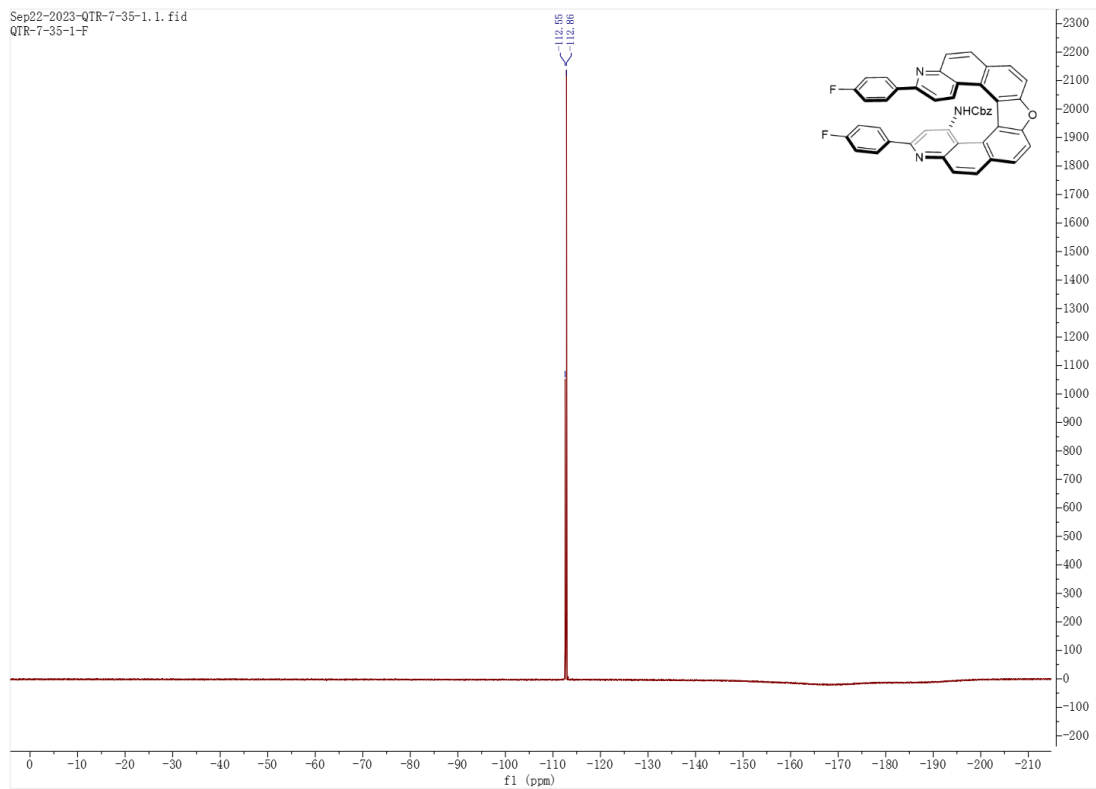

# Helicene 5d

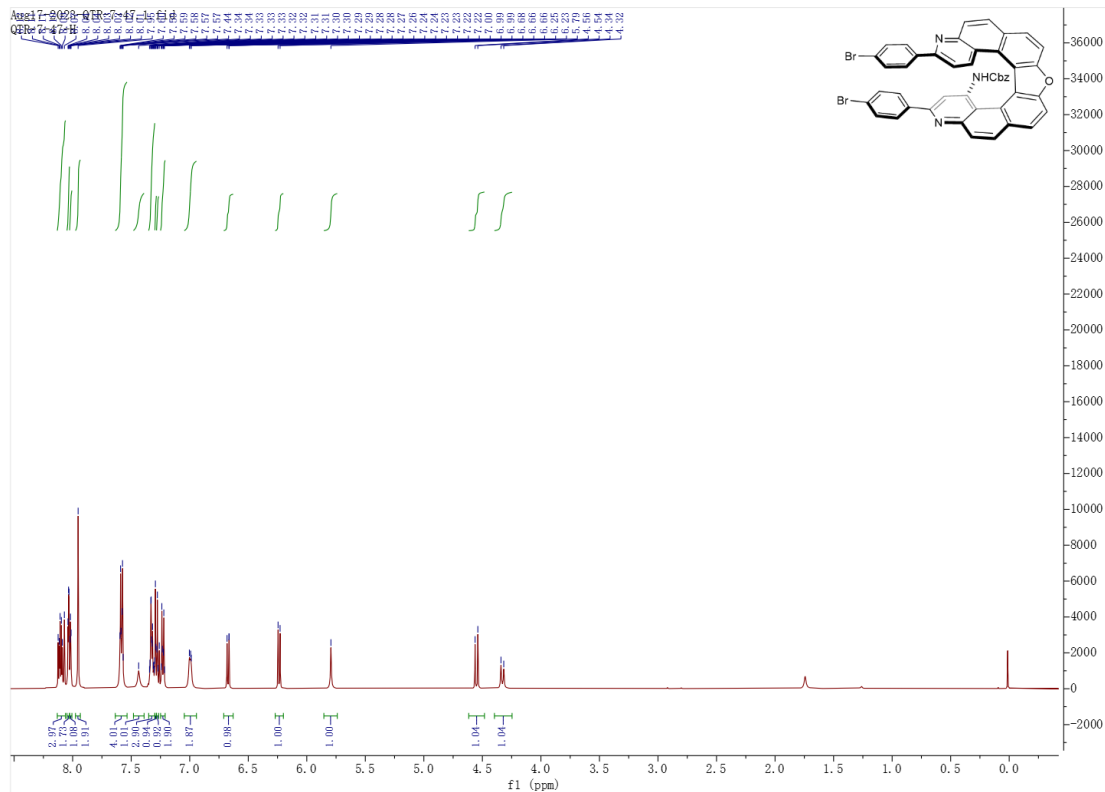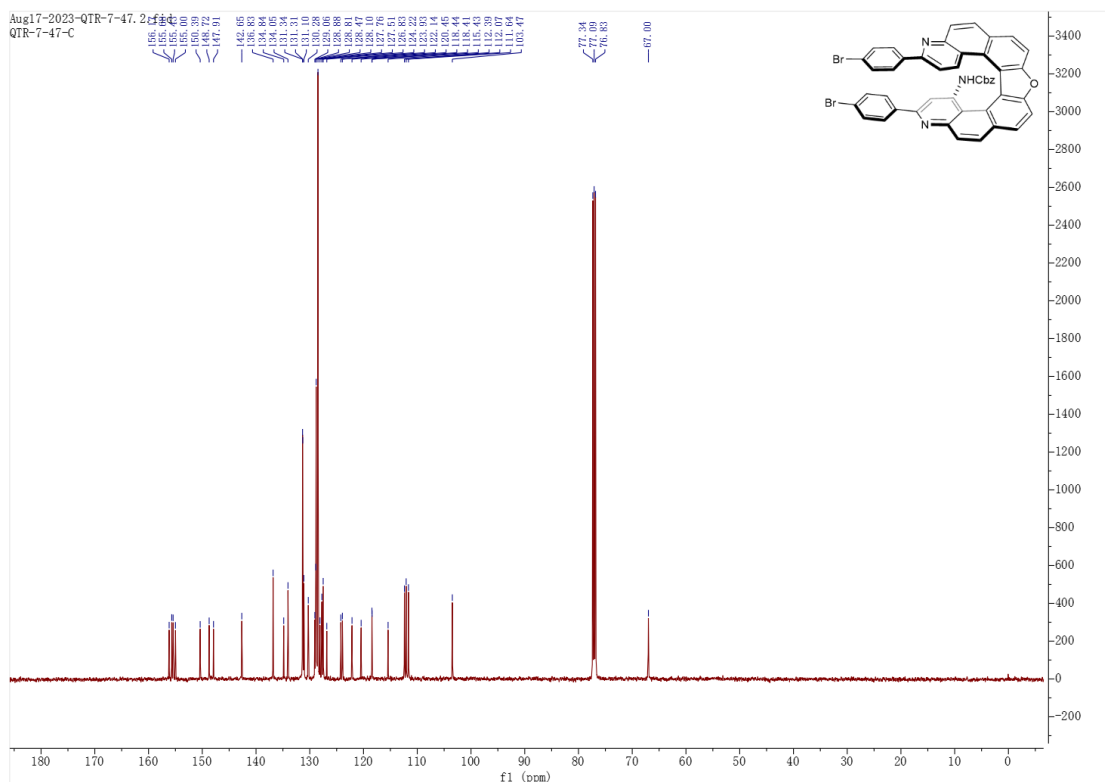

# Helicene 5c

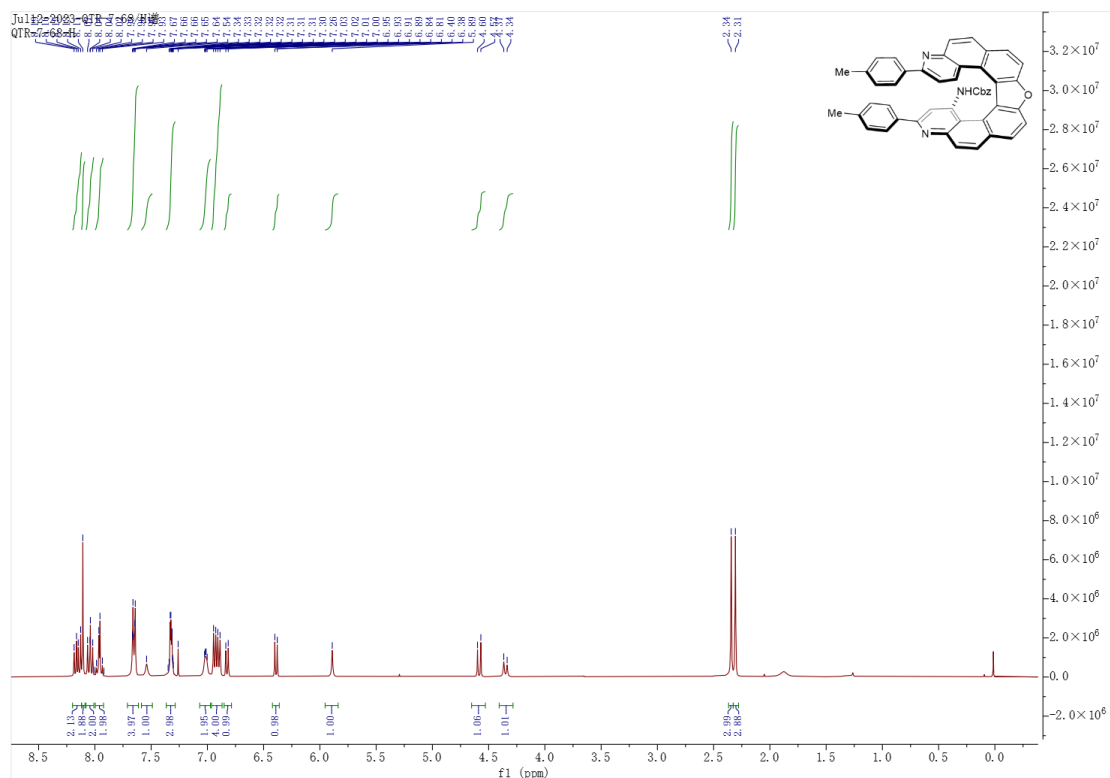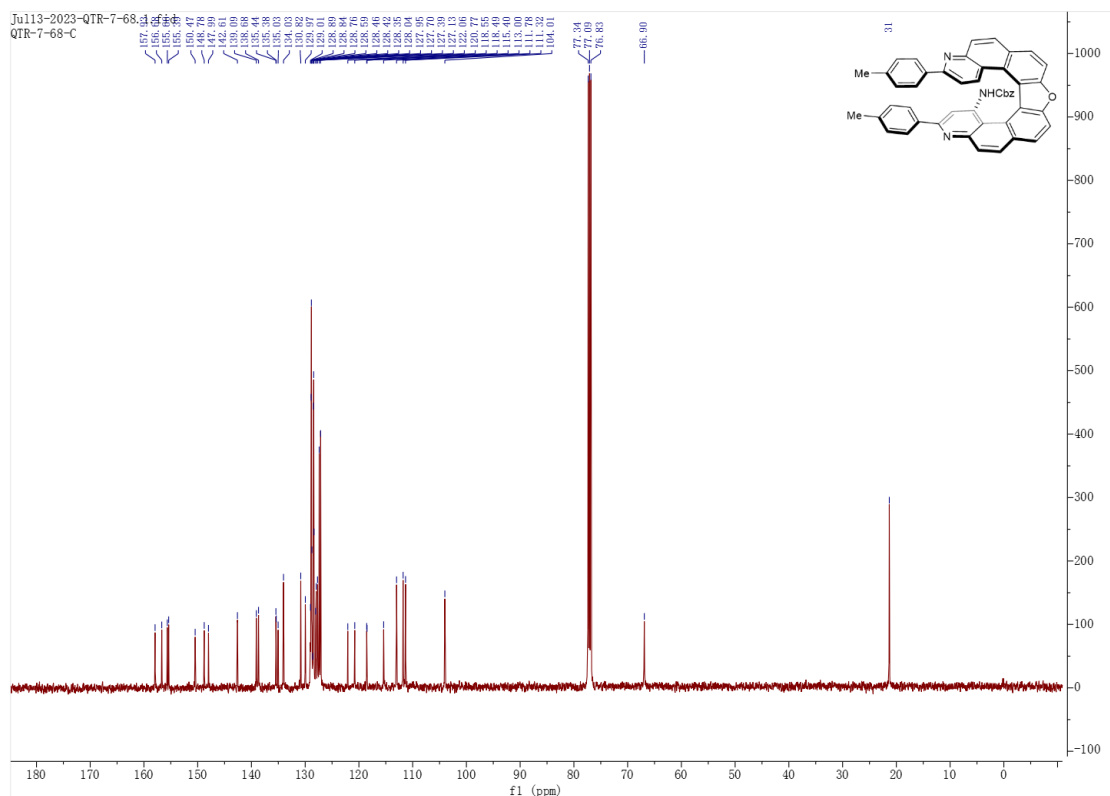

# Helicene 5f

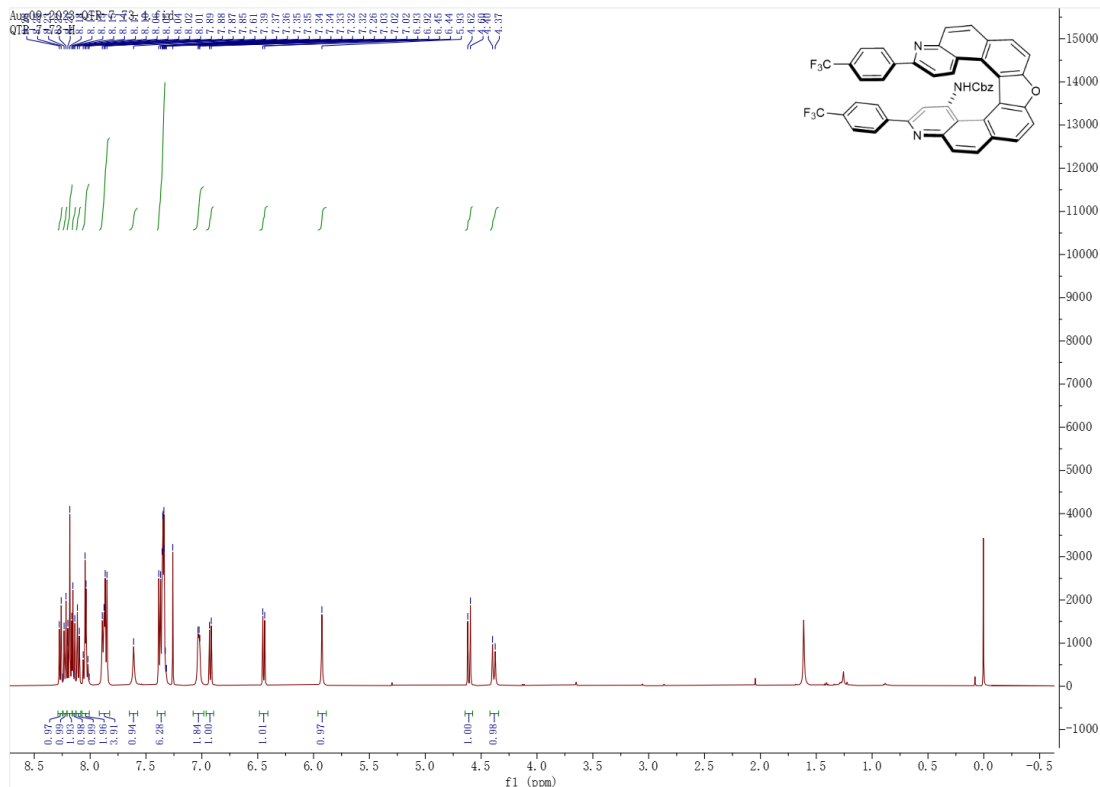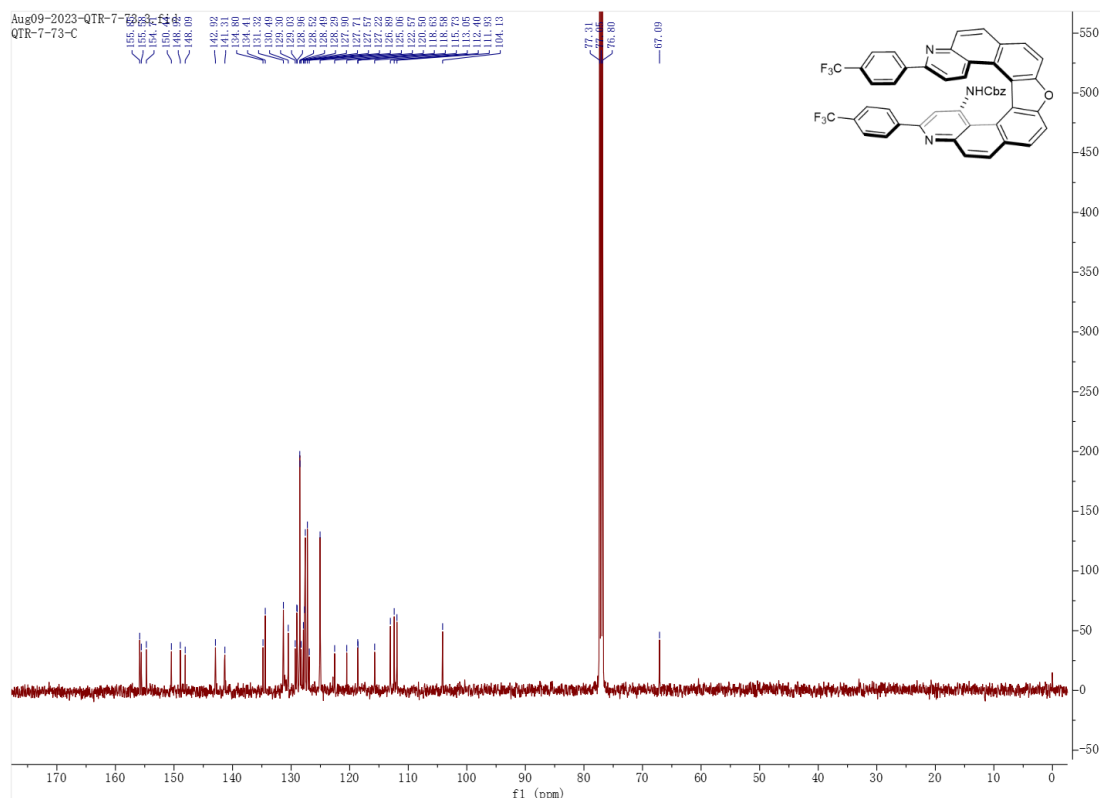

Aug09-2023-QTR-7-73. 2.fid  
QTR-7-73-F

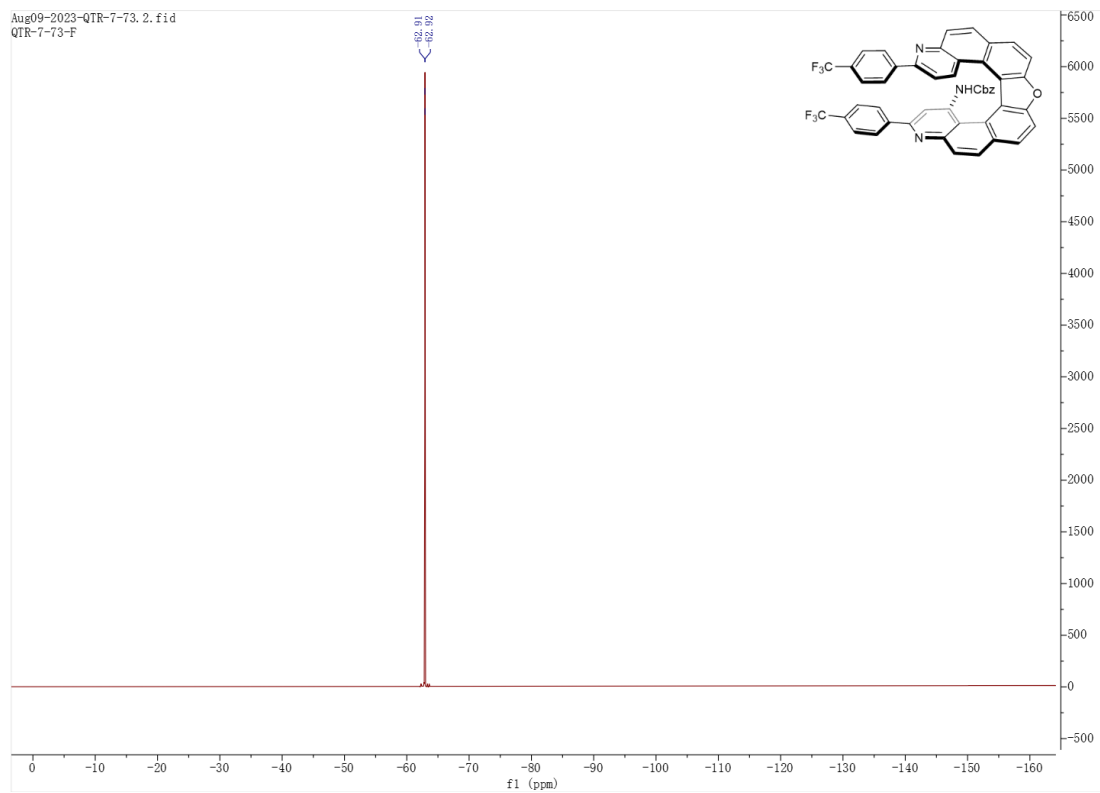

# Helicene 5g

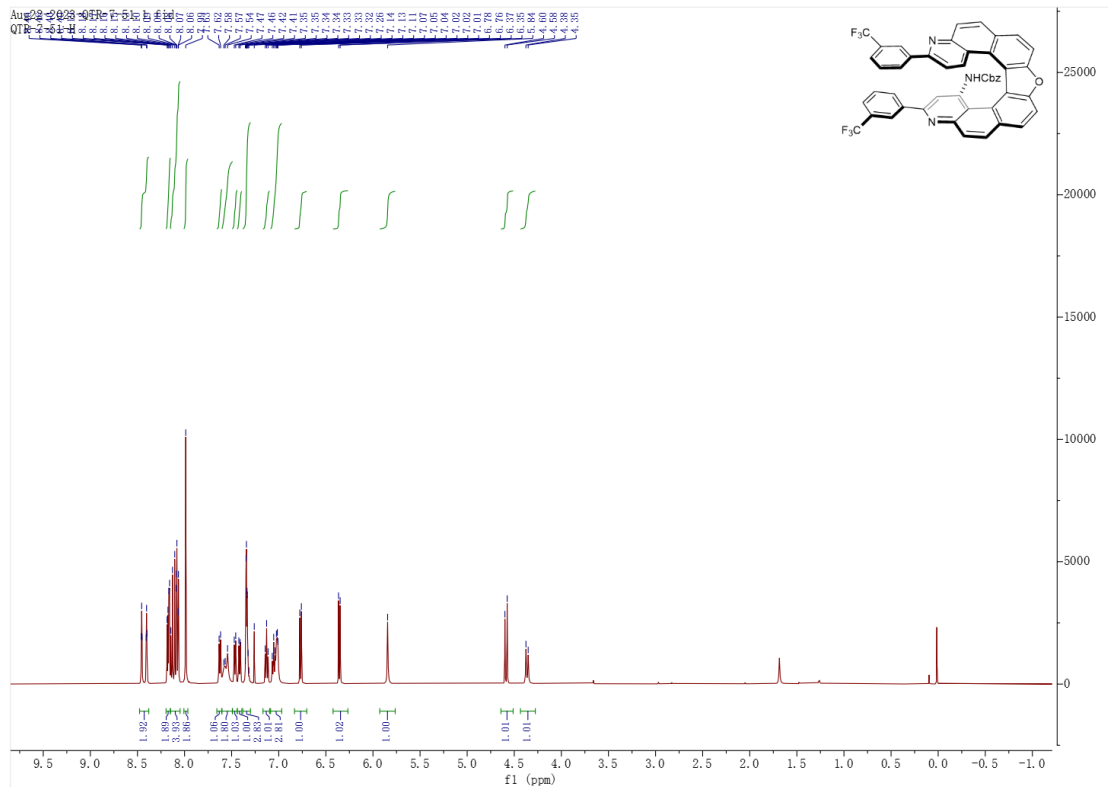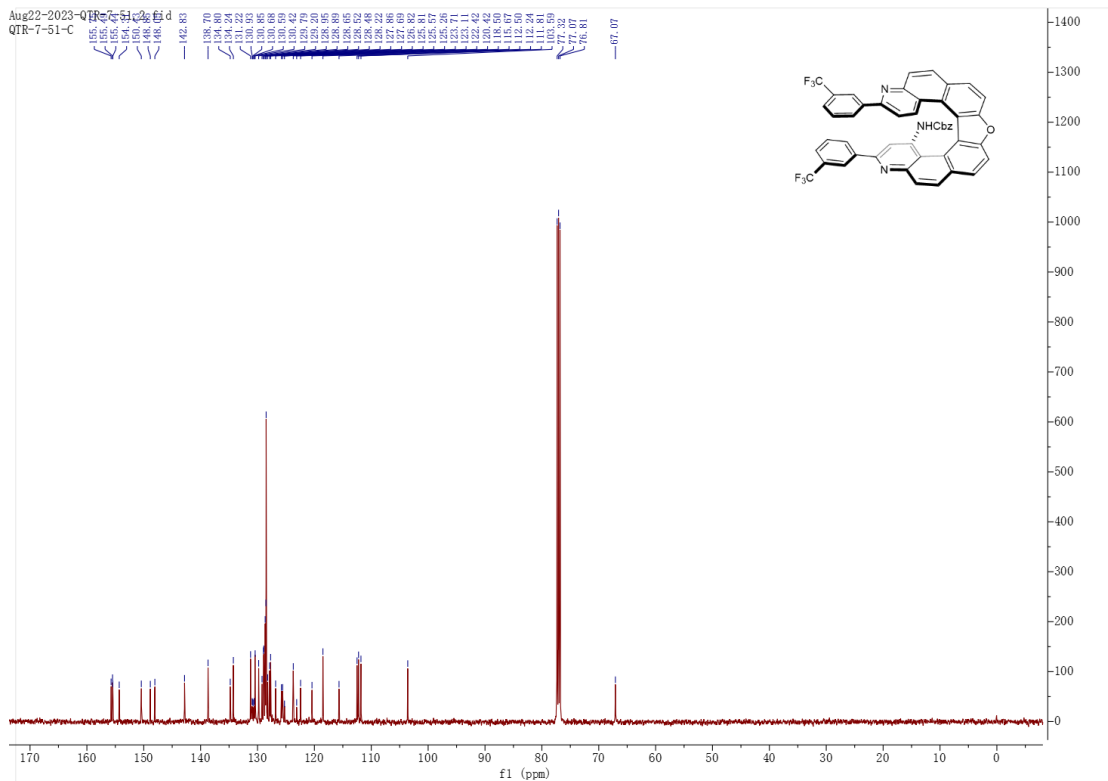



Aug22-2023-QTR-7-51.3.fid  
QTR-7-51-F

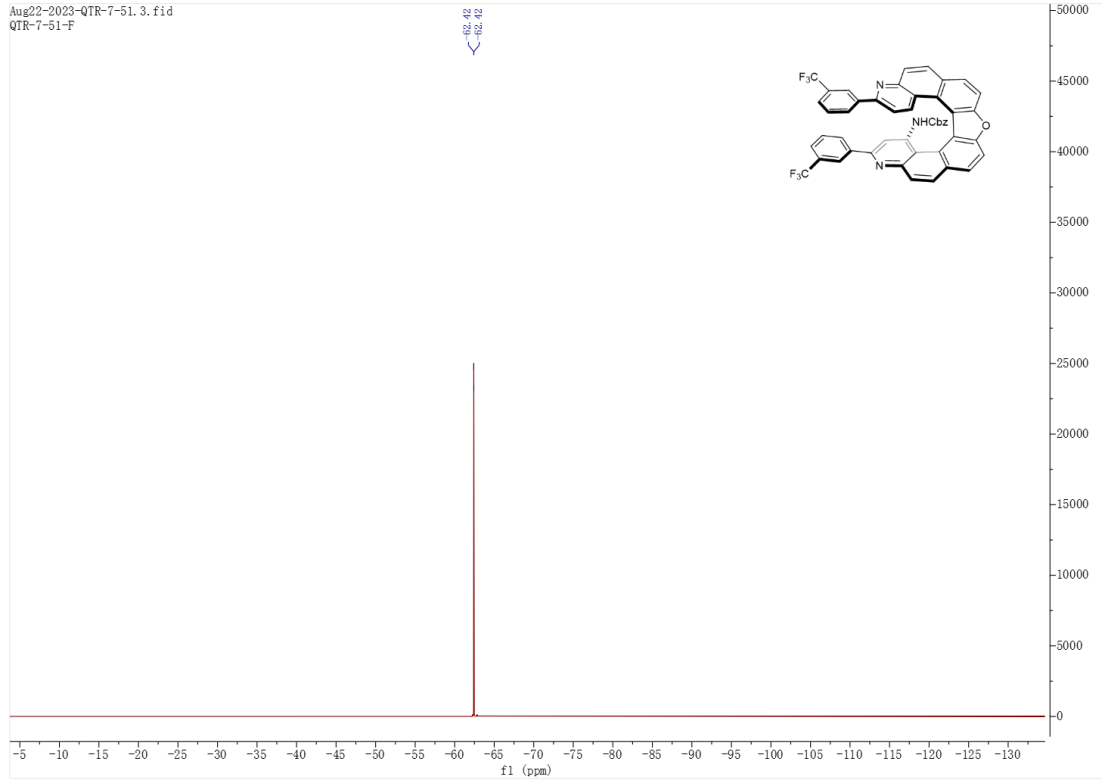

# Helicene 5h

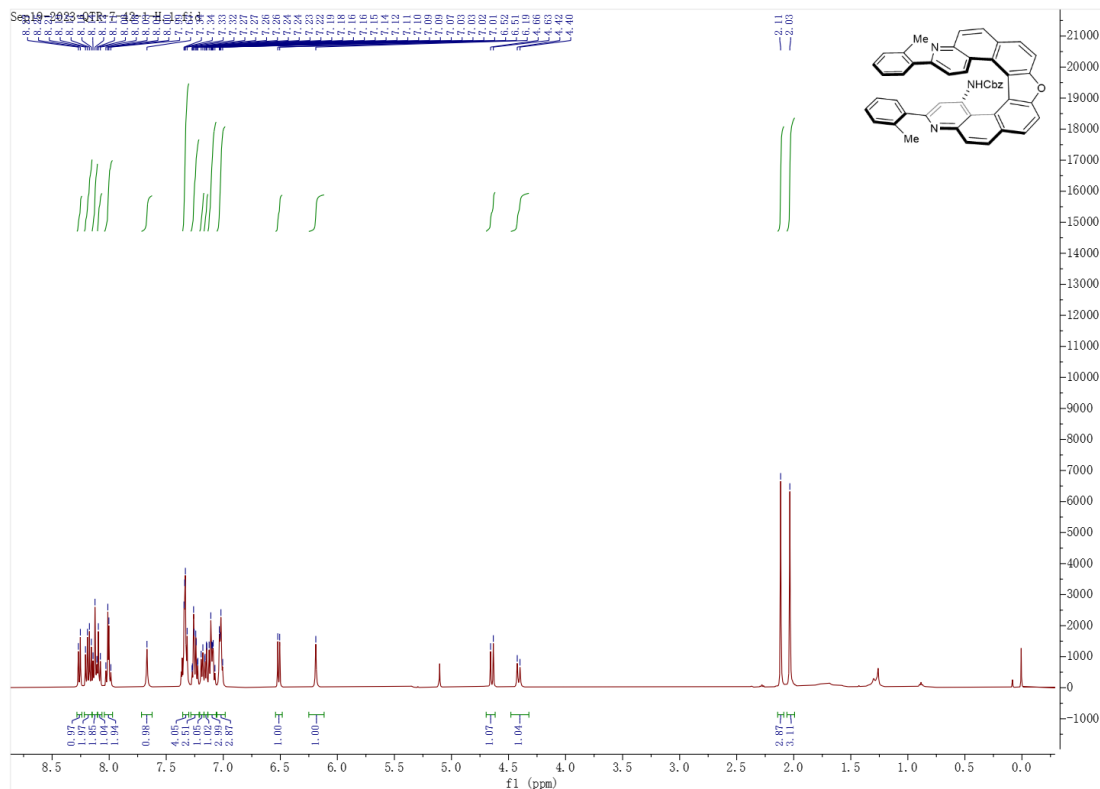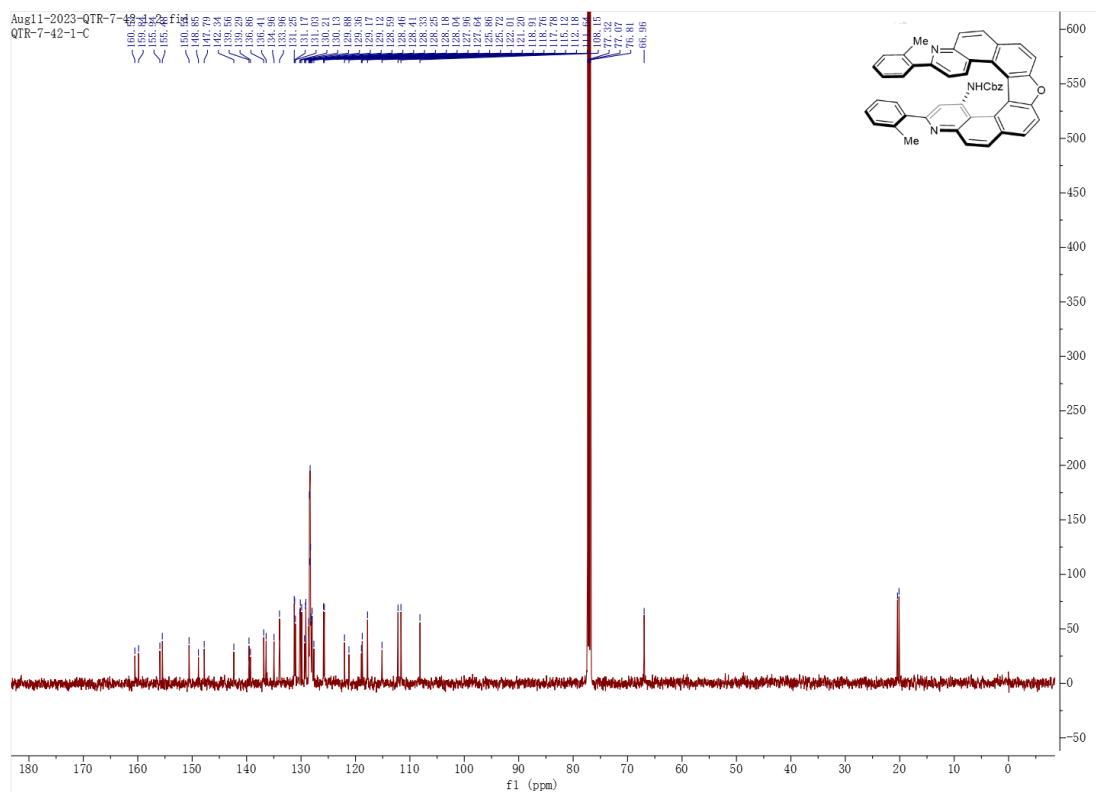

# Helicene 5i

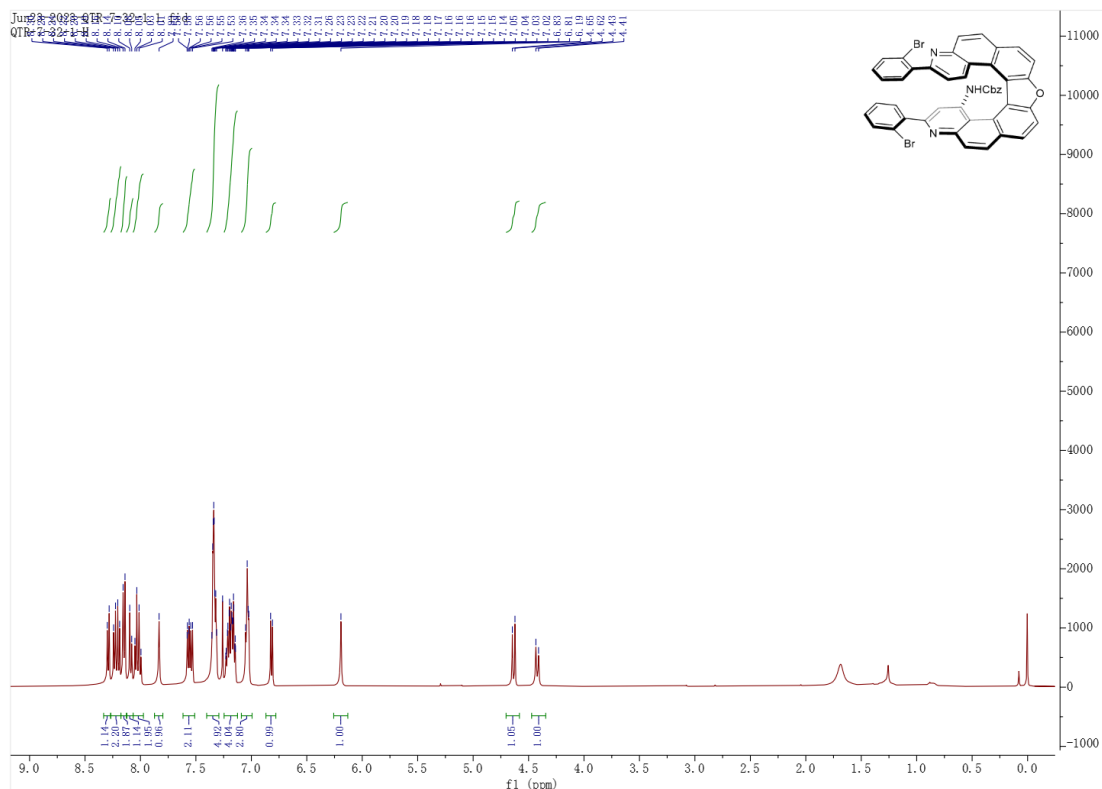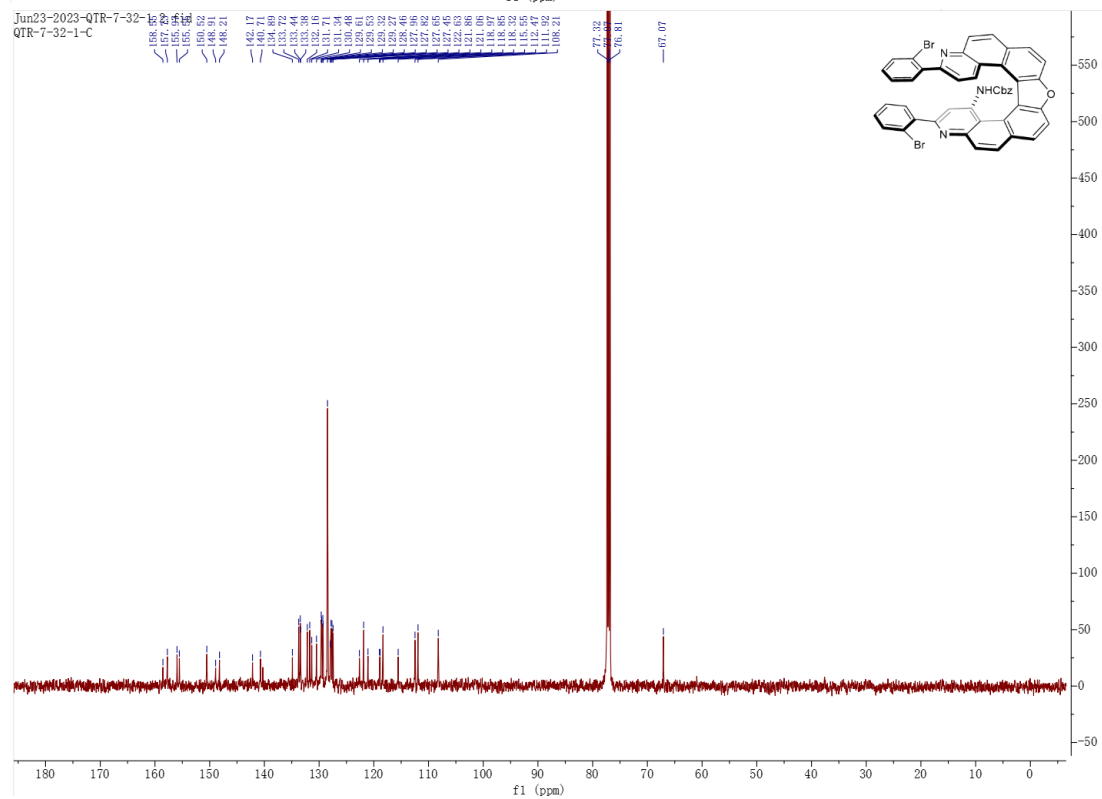

# Helicene 5j

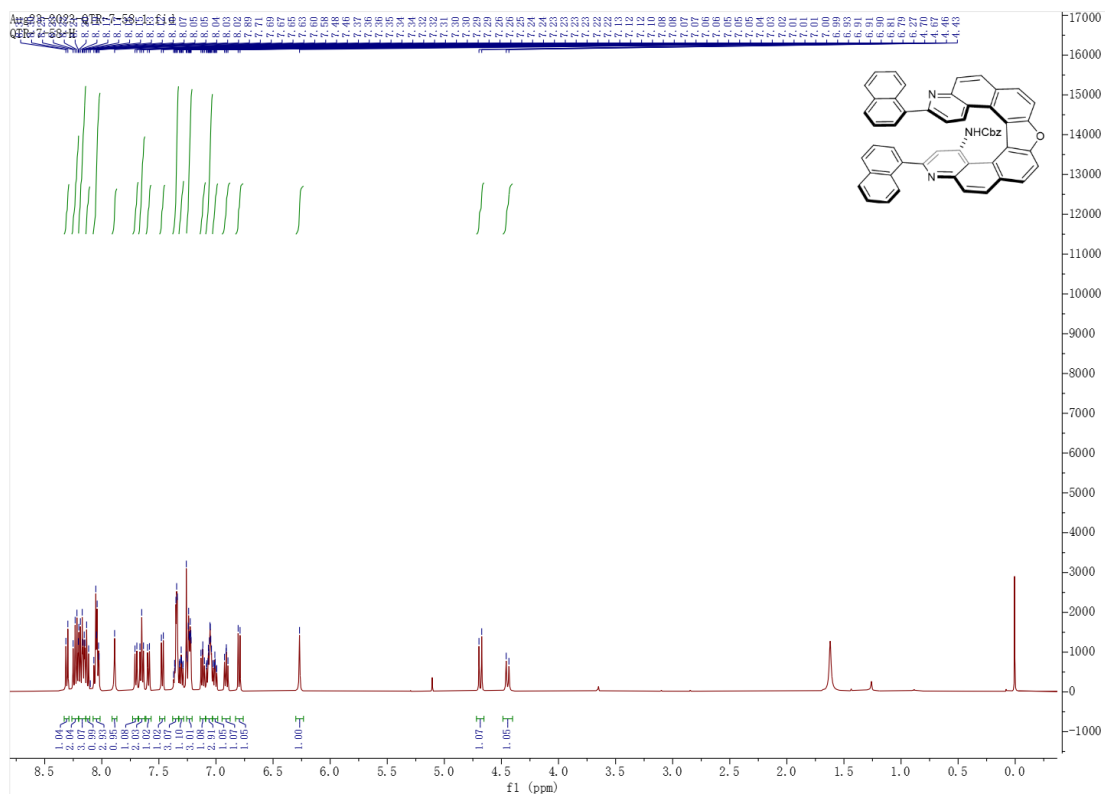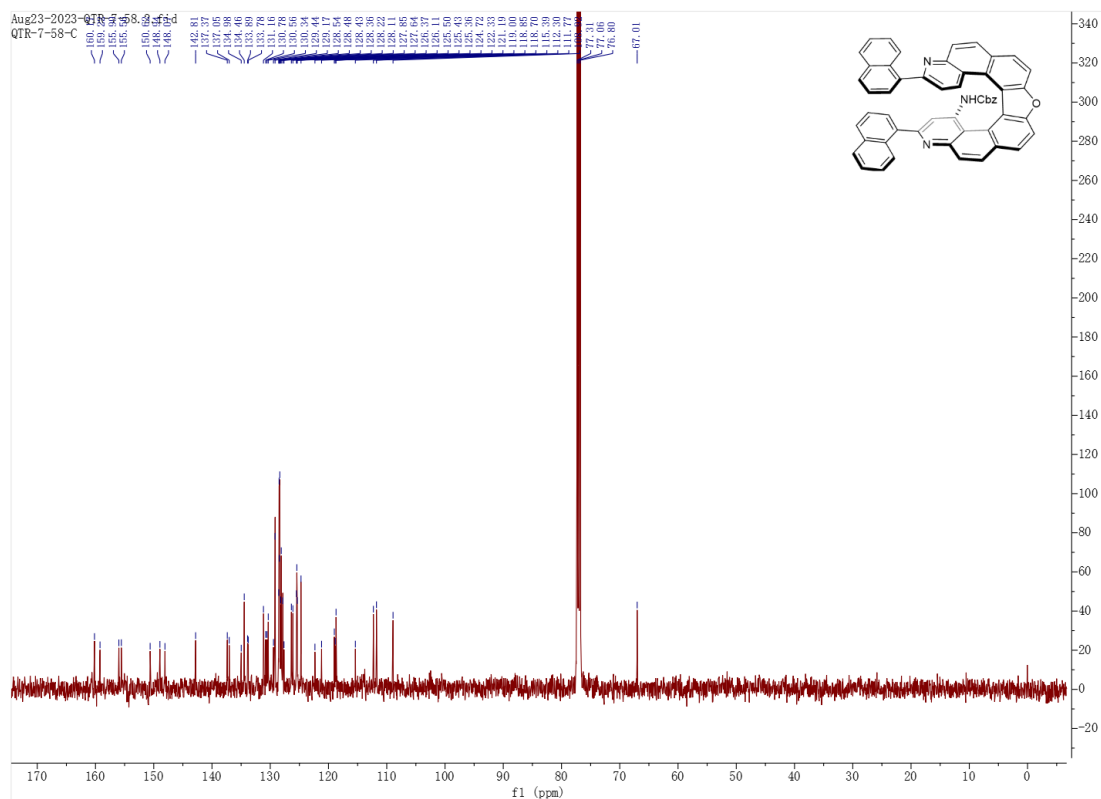

# Helicene 5k

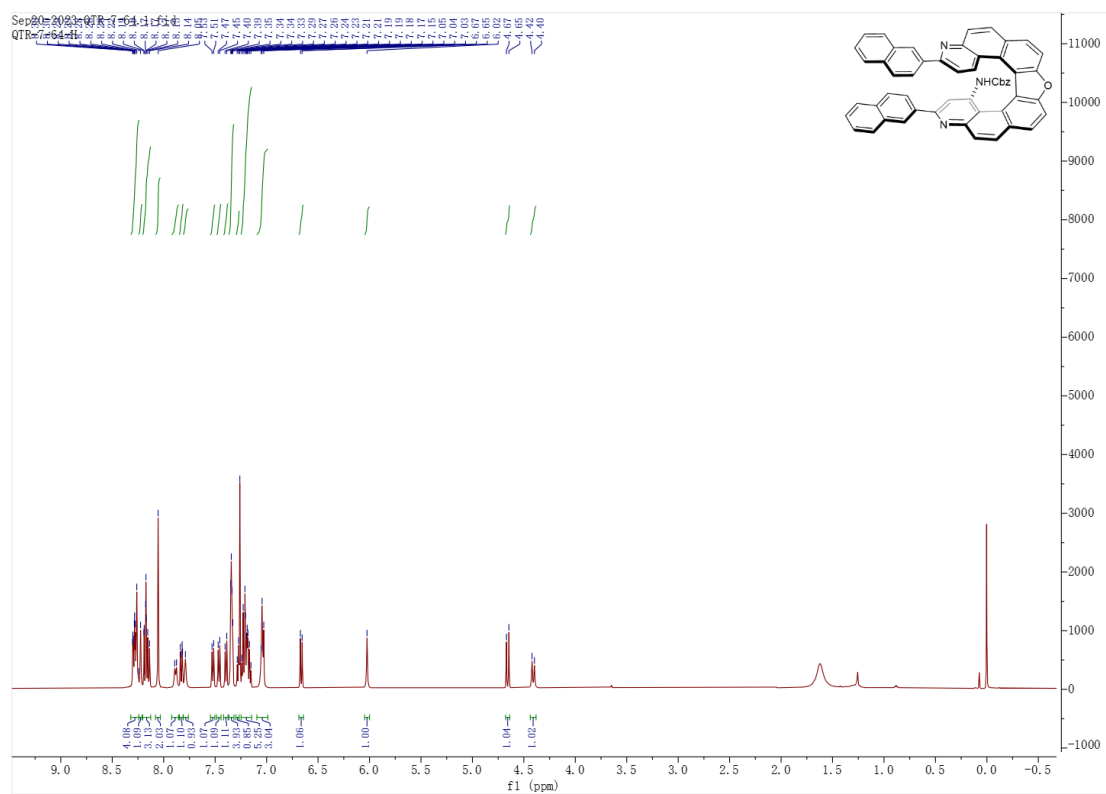

# Helicene 51

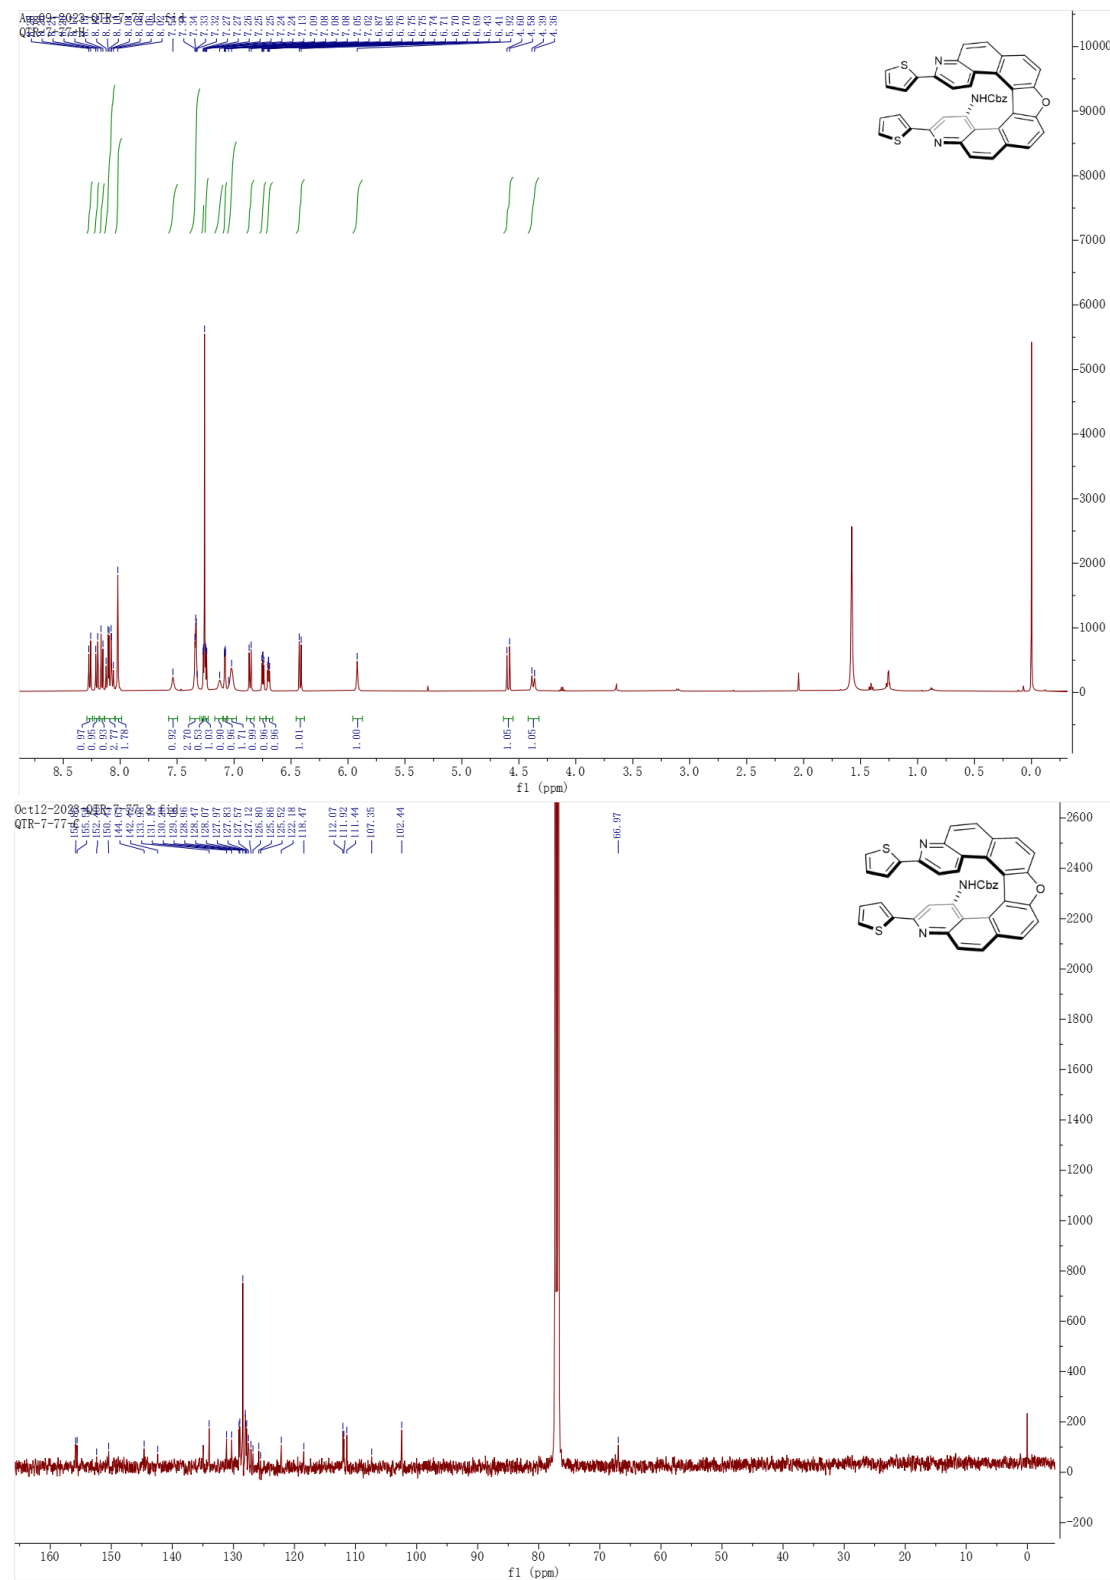

# Helicene 6a

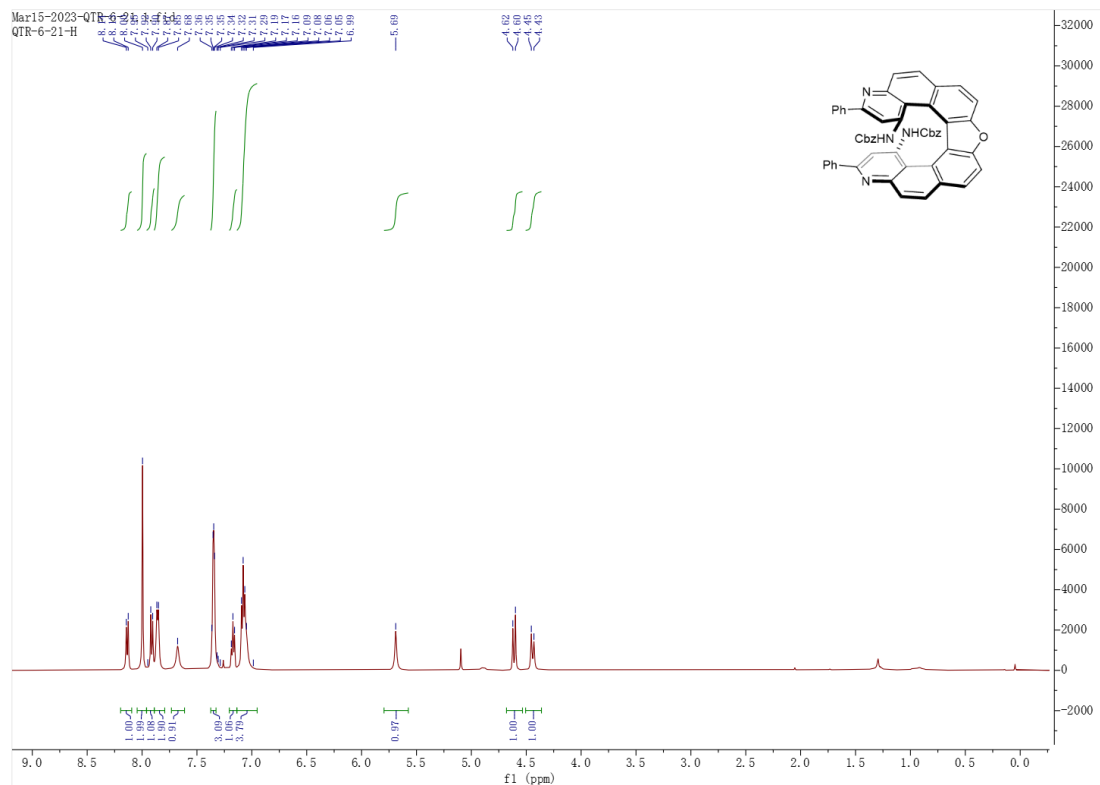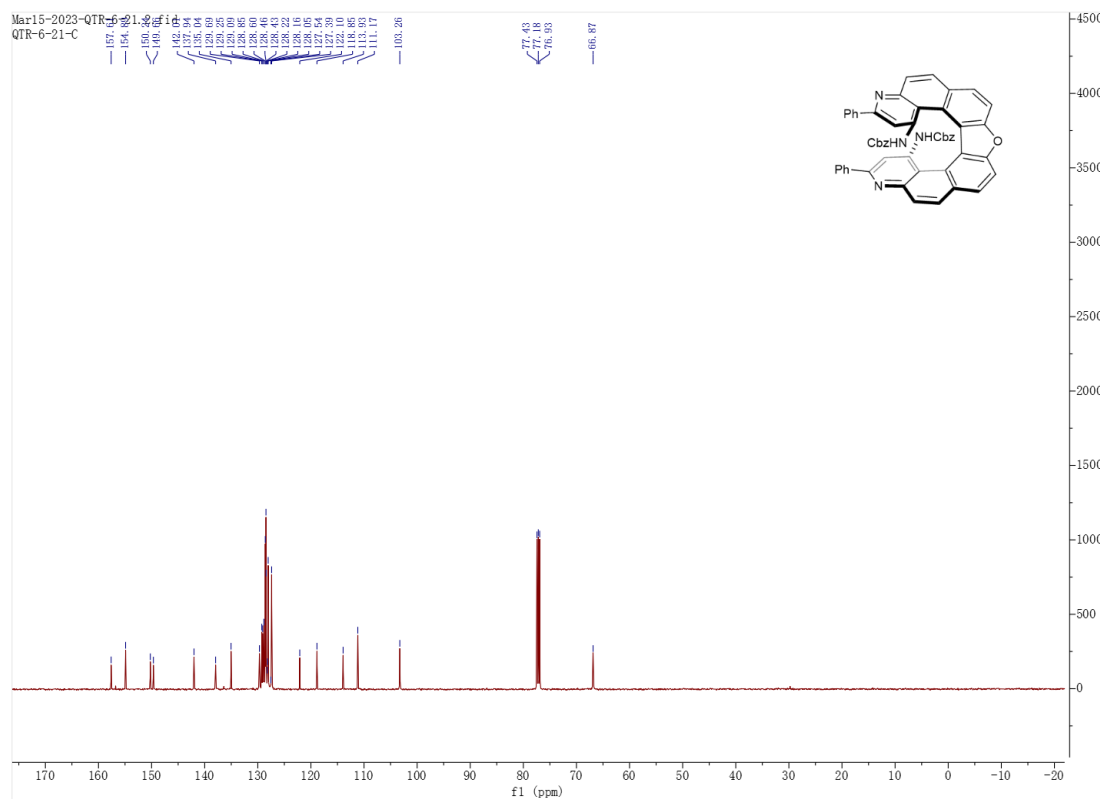

# Helicene 6b

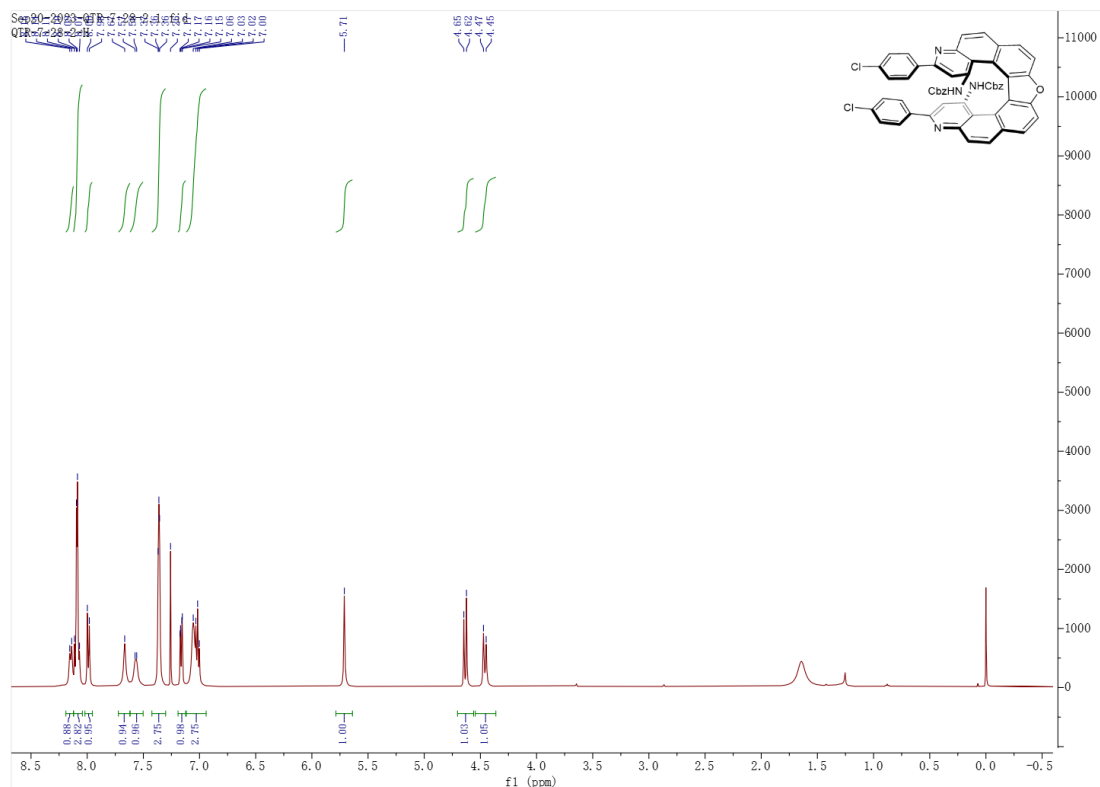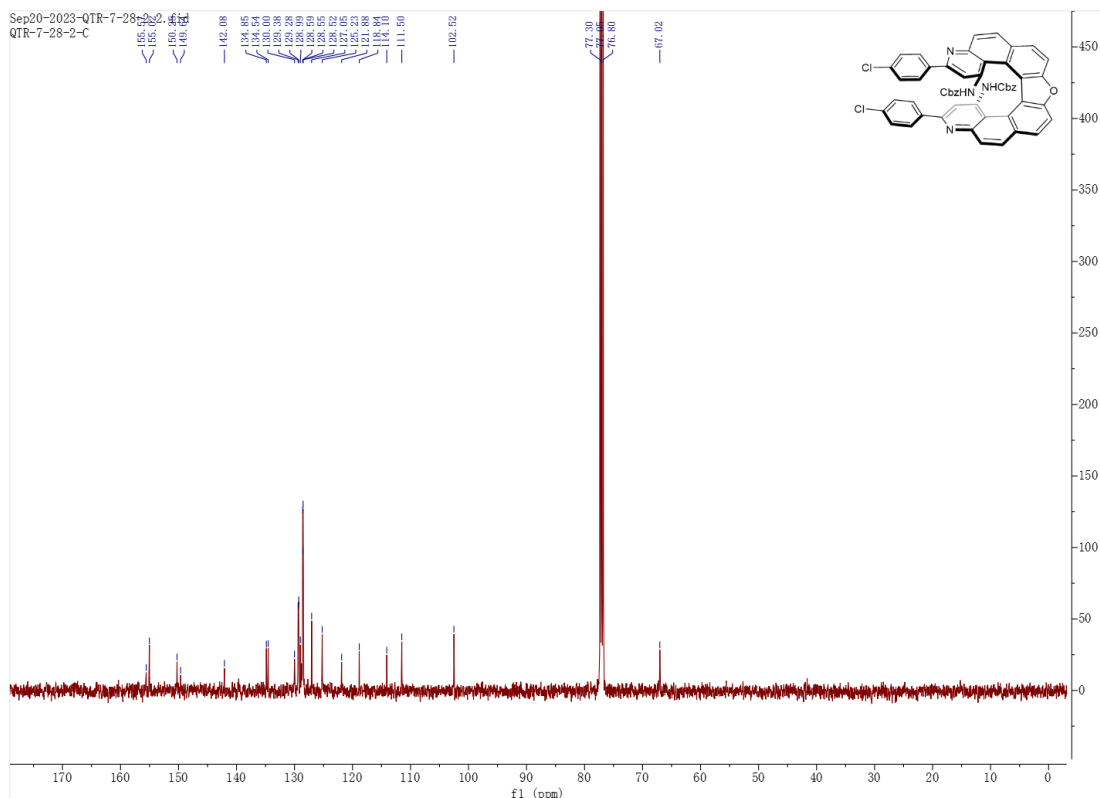



# Helicene 6c

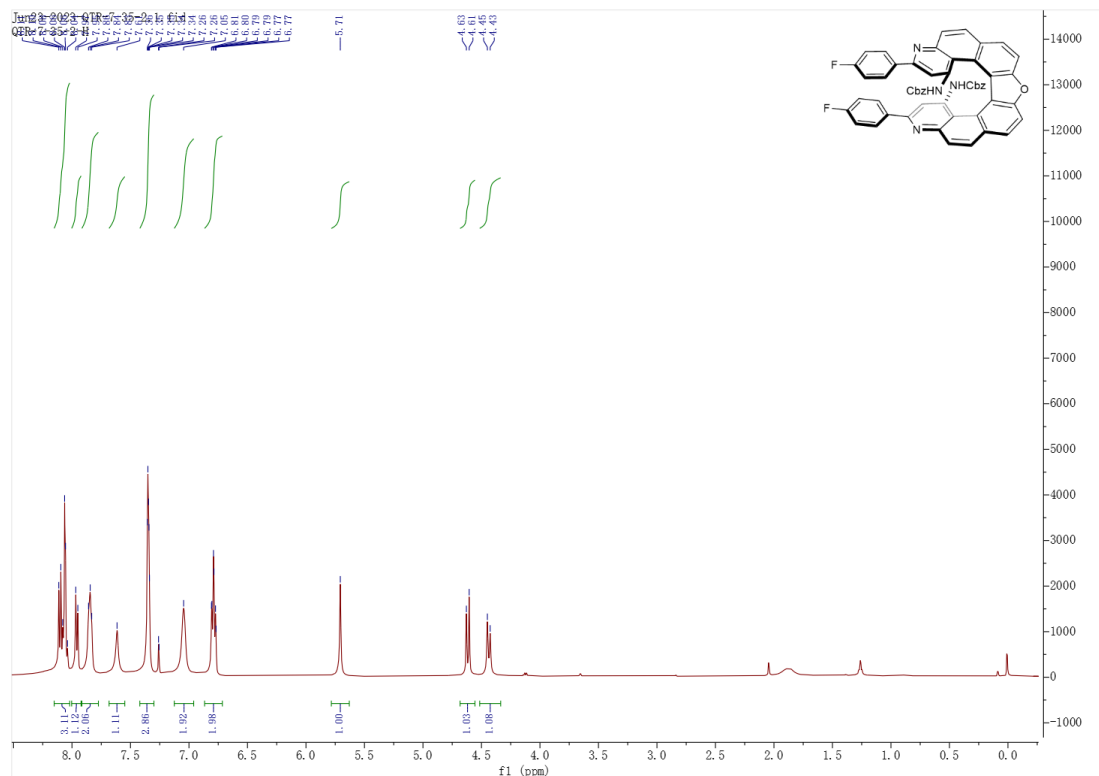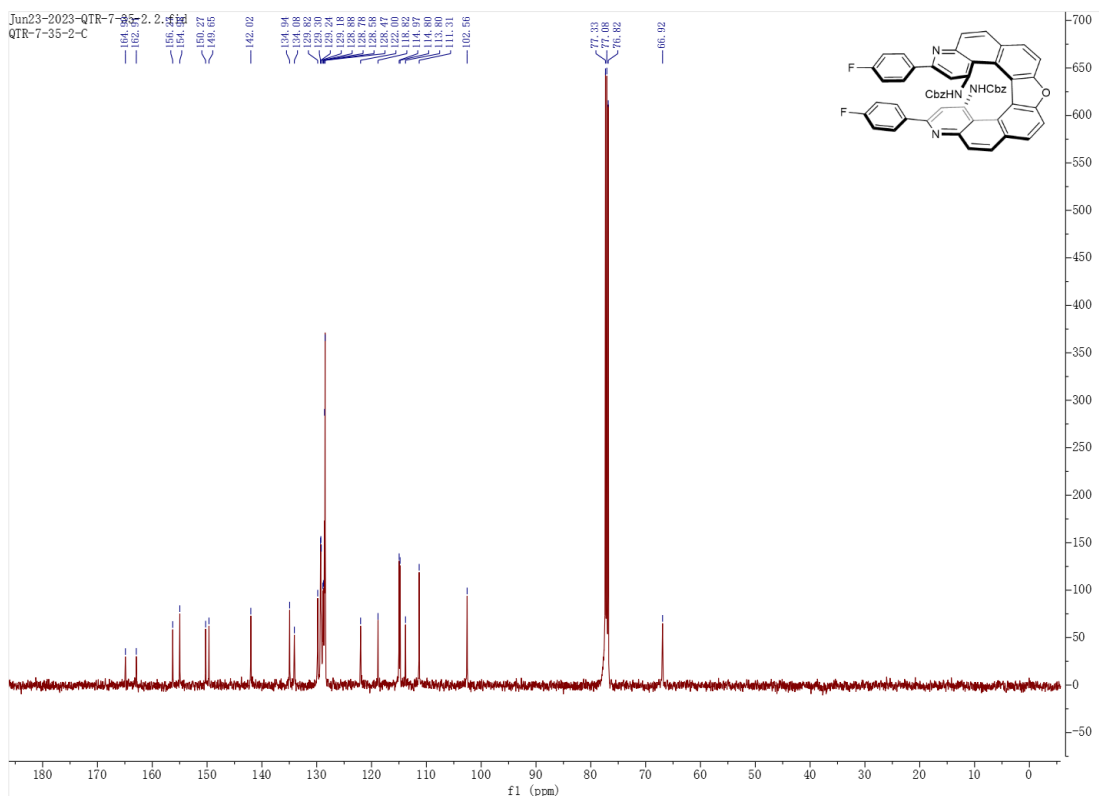

Sep22-2023-QTR-7-35-2.1.fid  
QTR-7-35-2.F

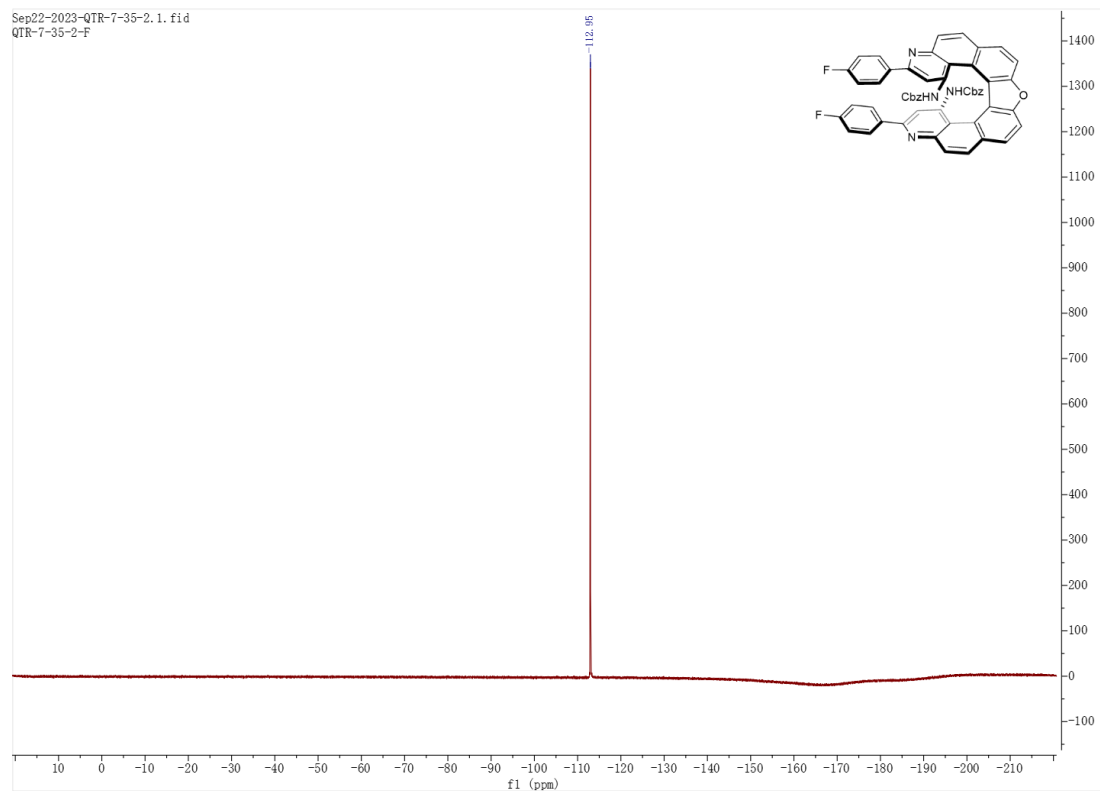



# Helicene 6c

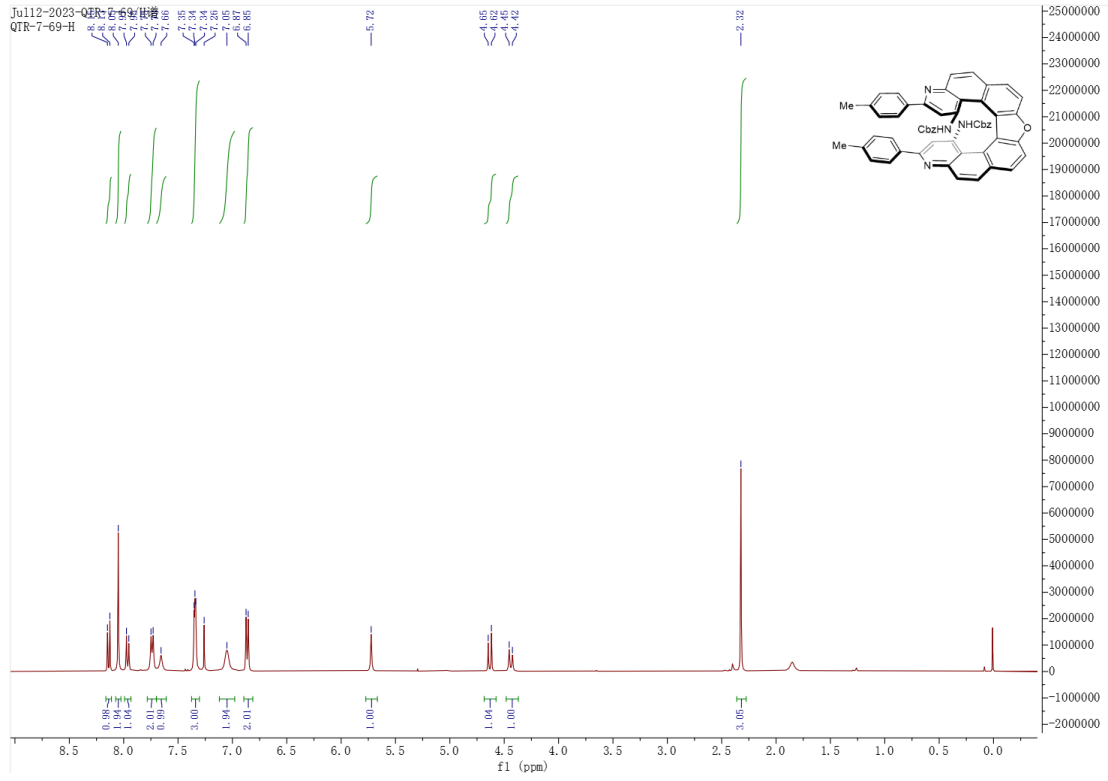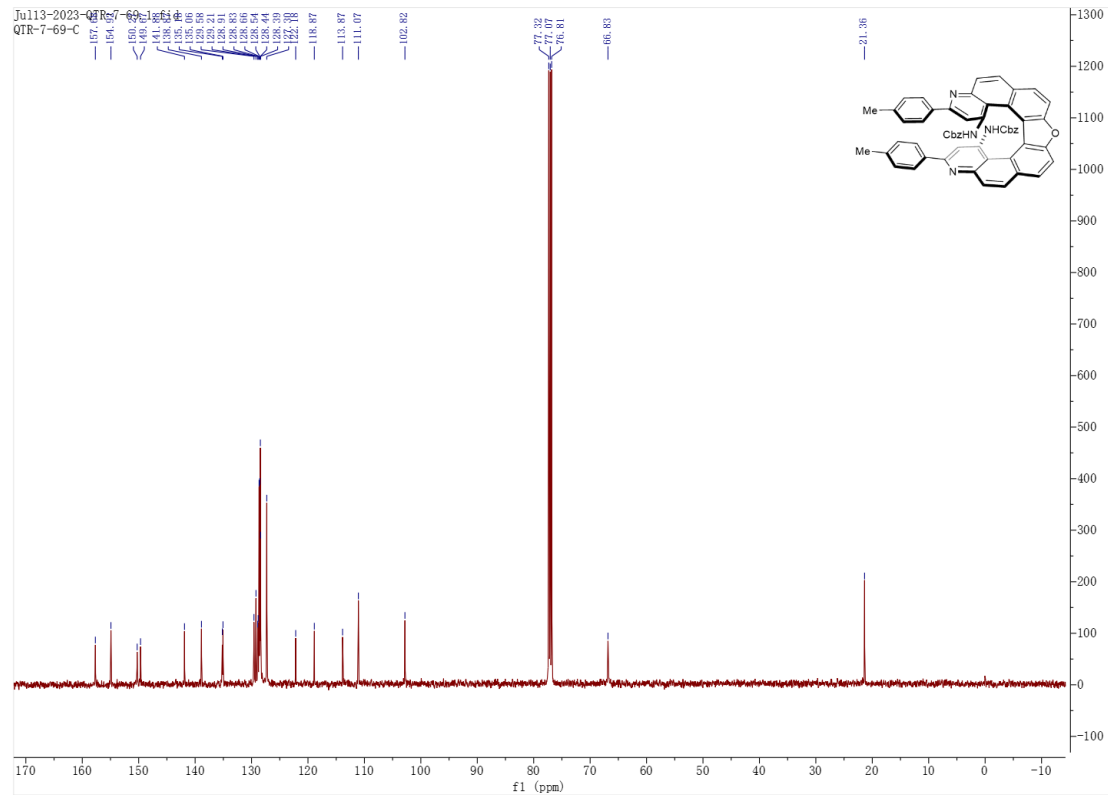

# Helicene 6f

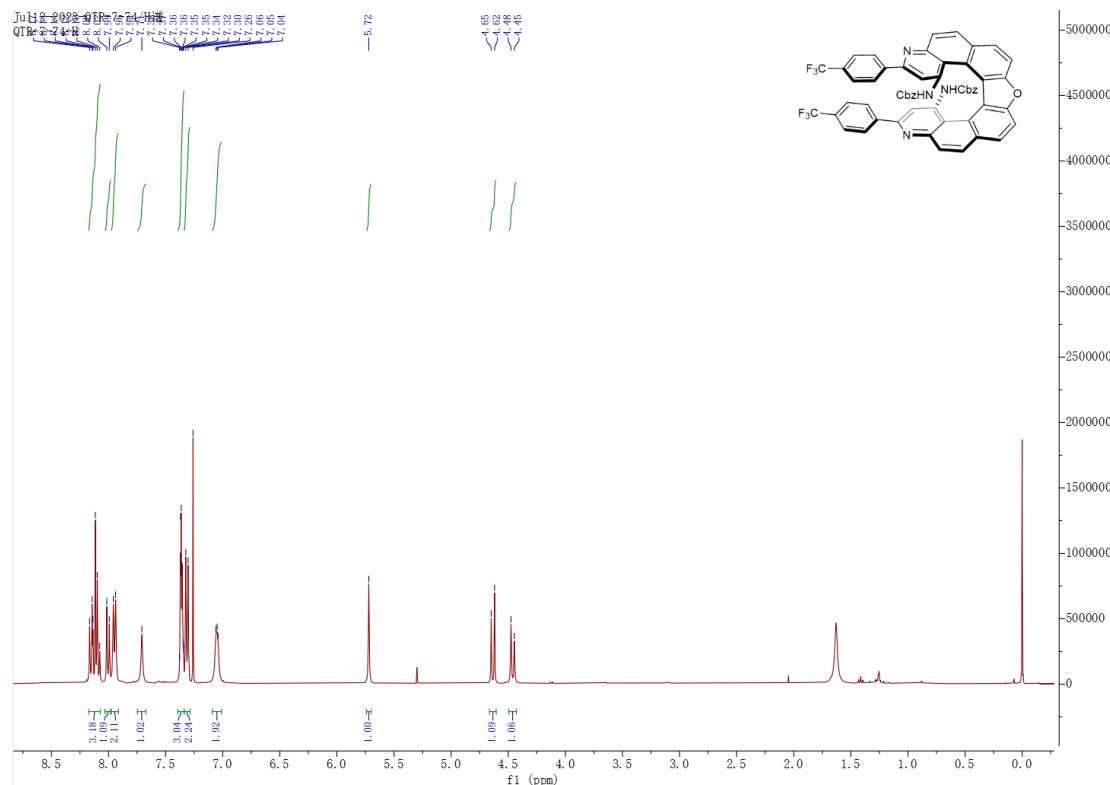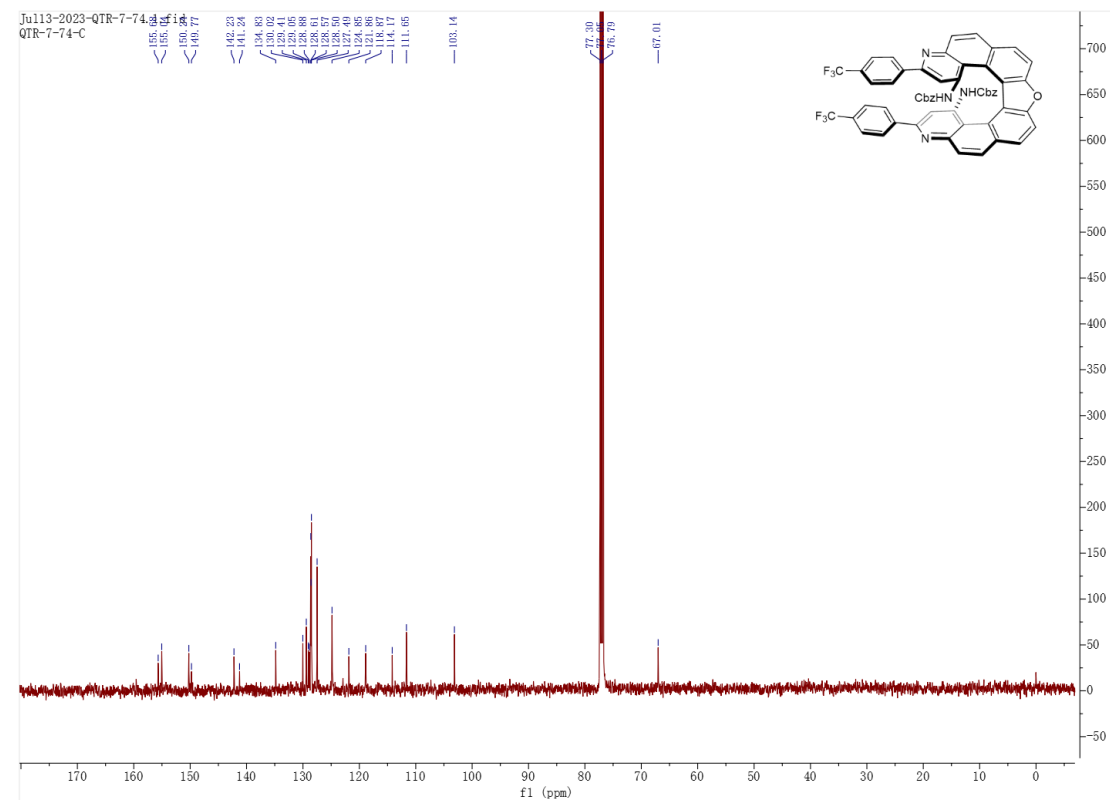

Jul14-2023-QTR-7-74.1.fid  
QTR-7-74-F

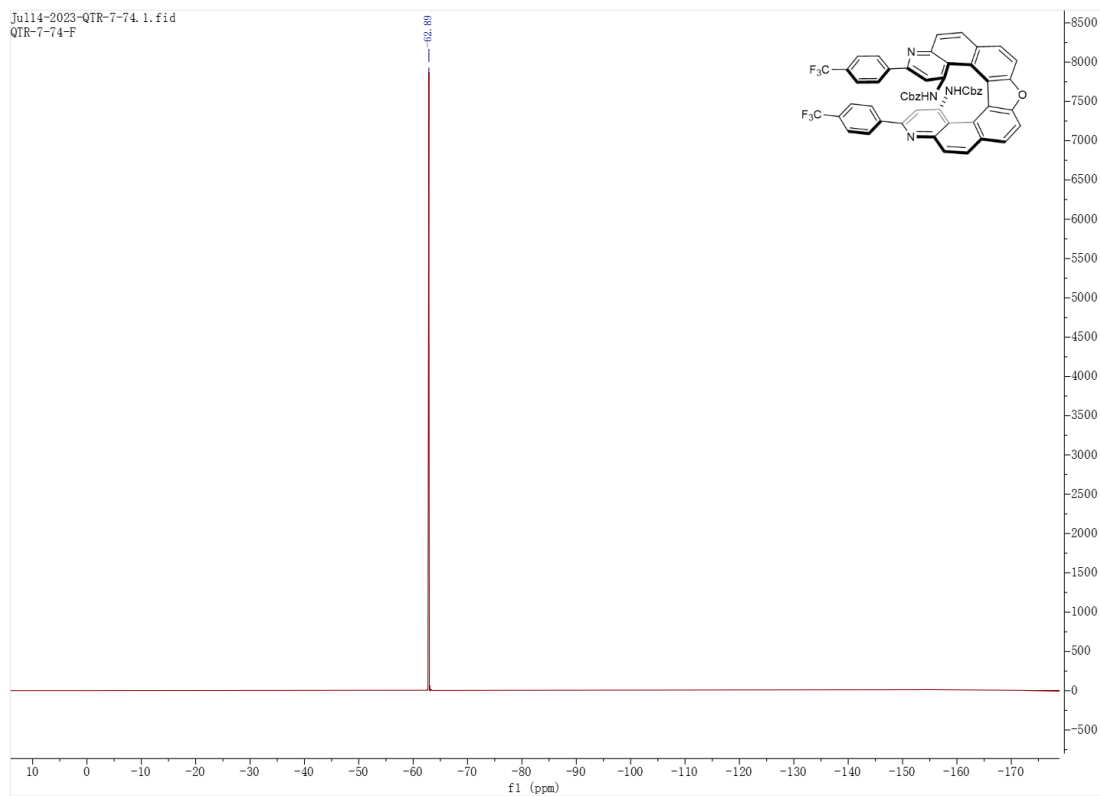

# Helicene 6g

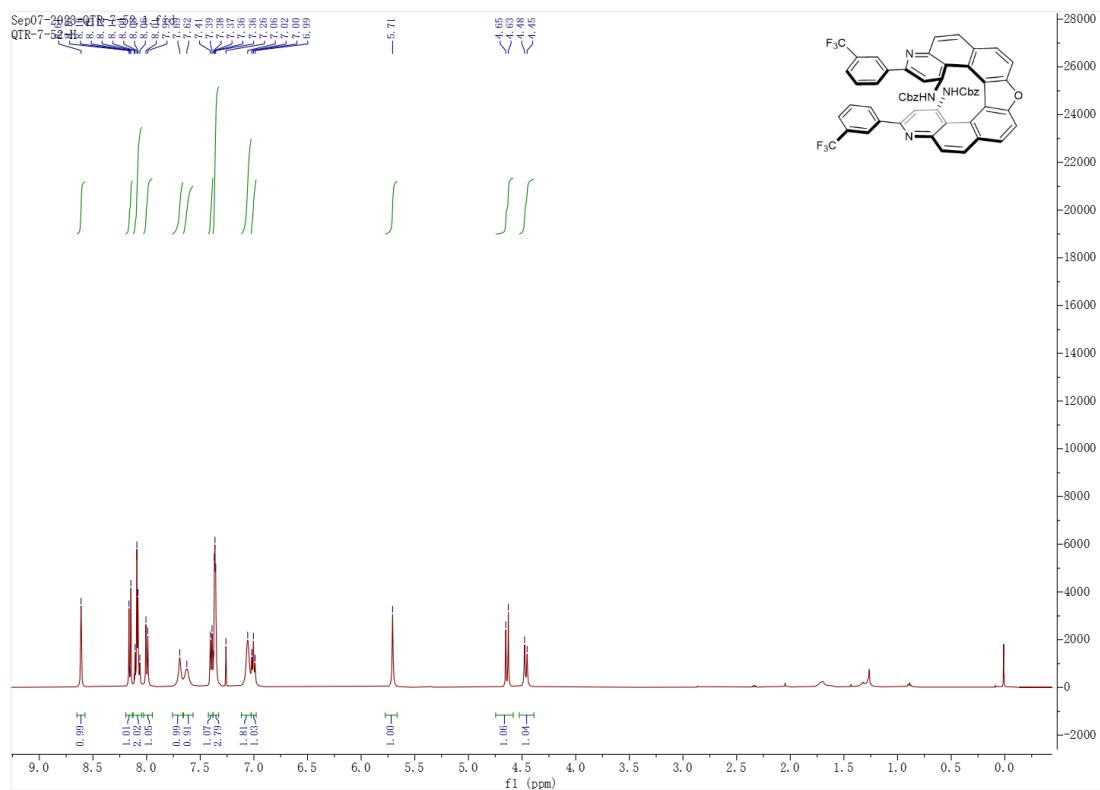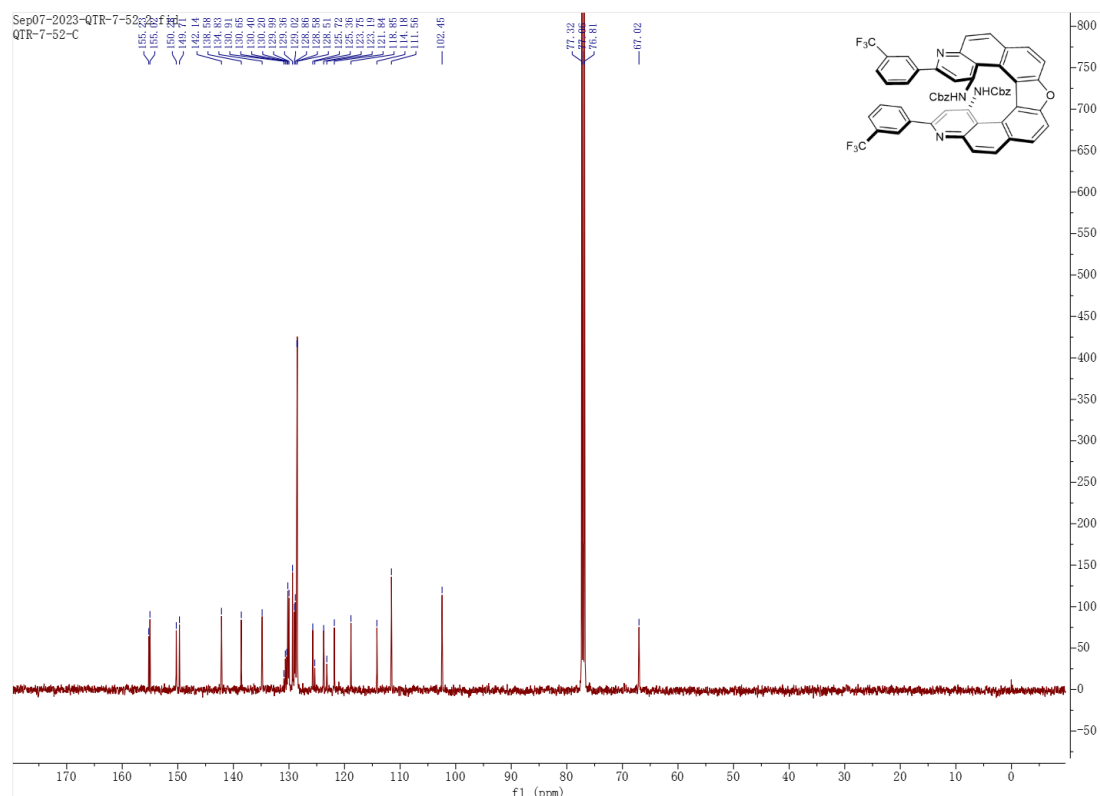

Aug22-2023-QTR-7-52. 3.fid  
QTR-7-52-F

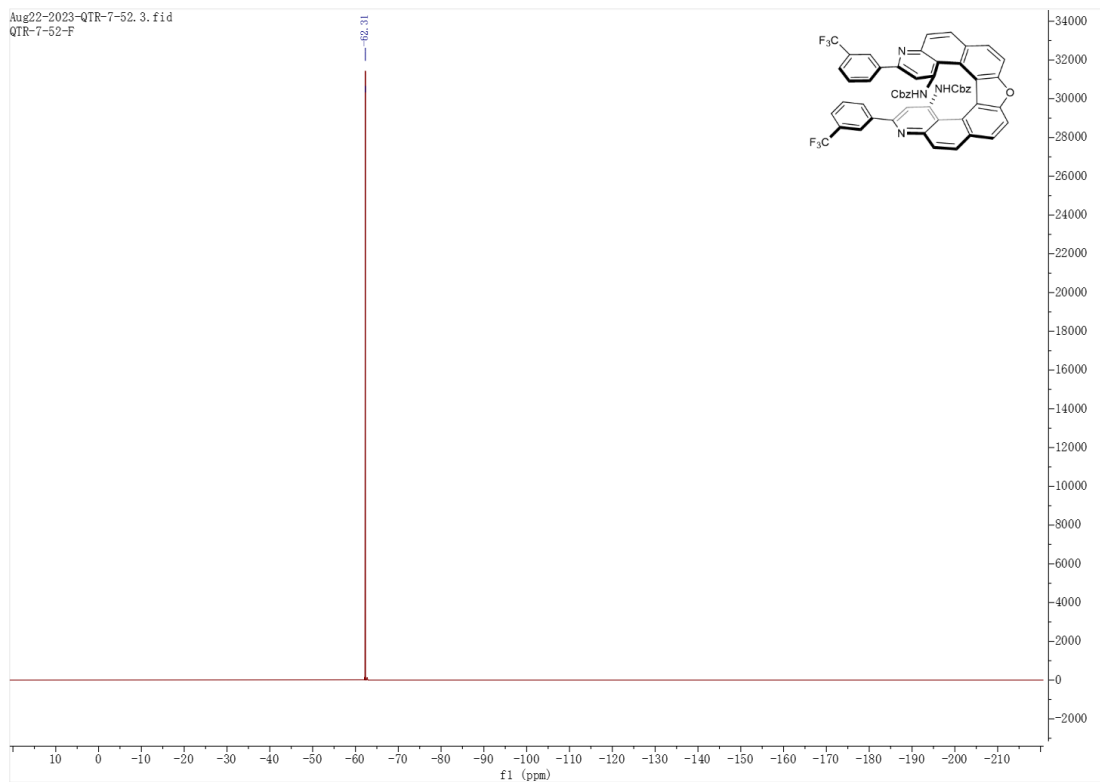



# Helicene 6h

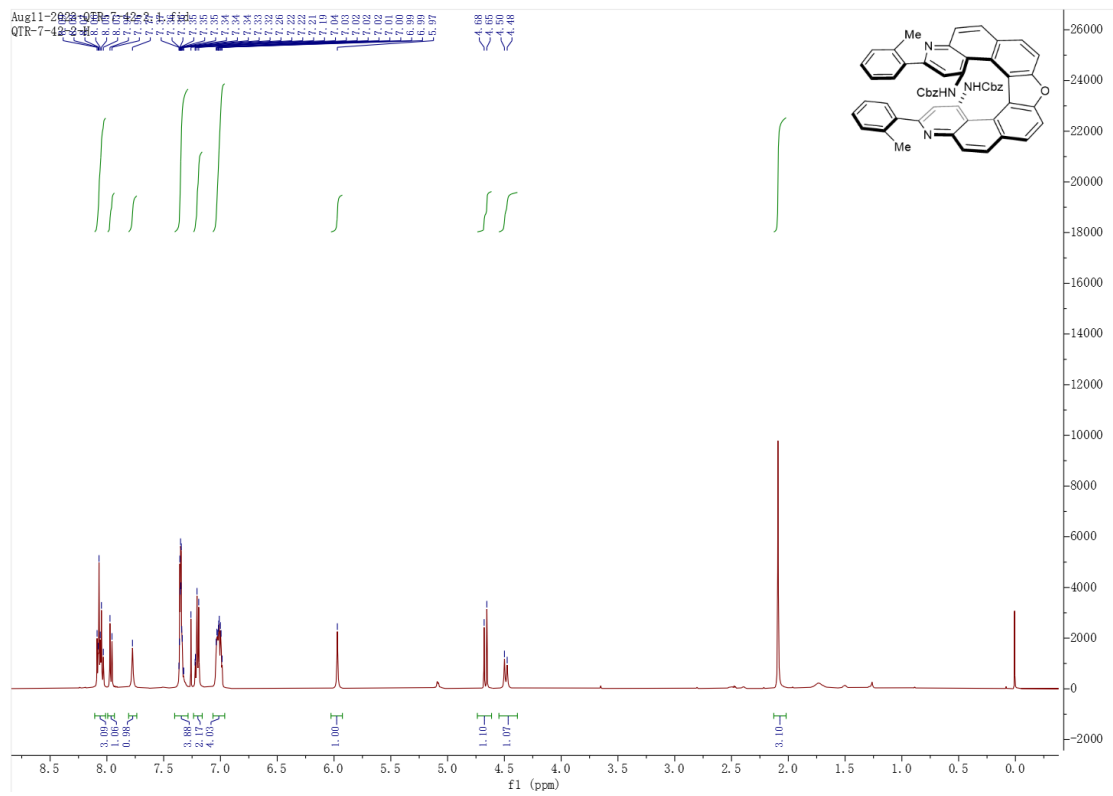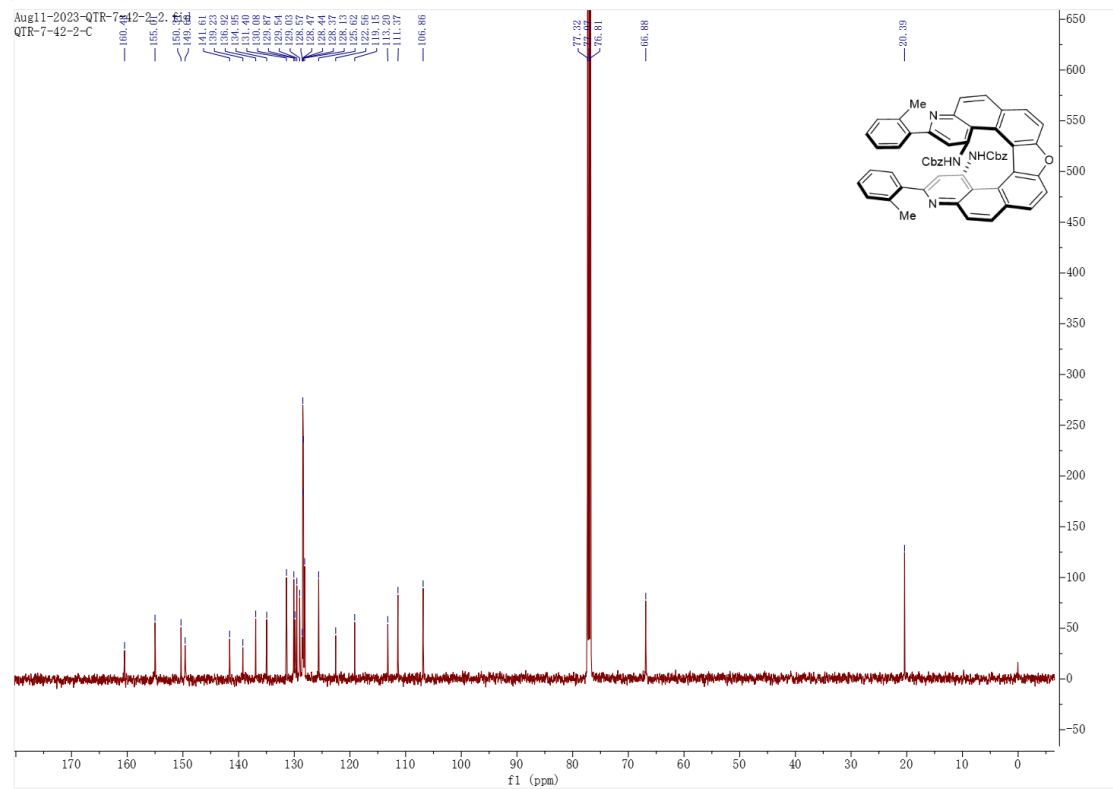

# Helicene 6i

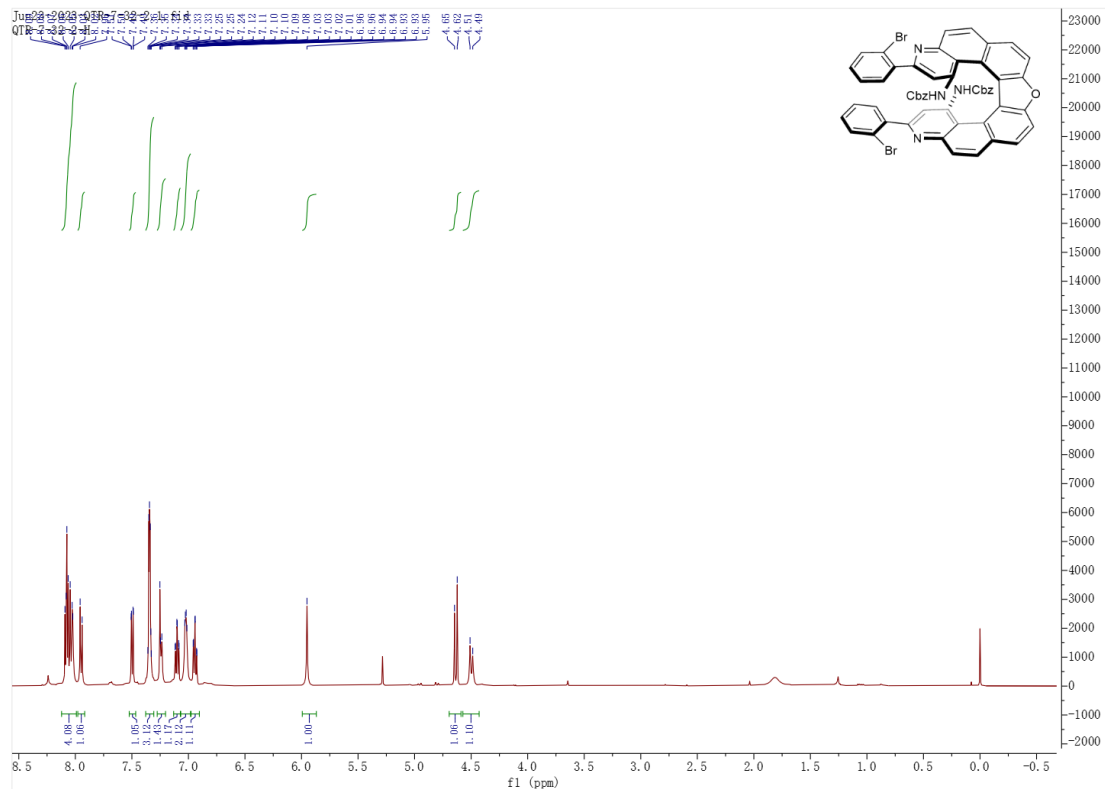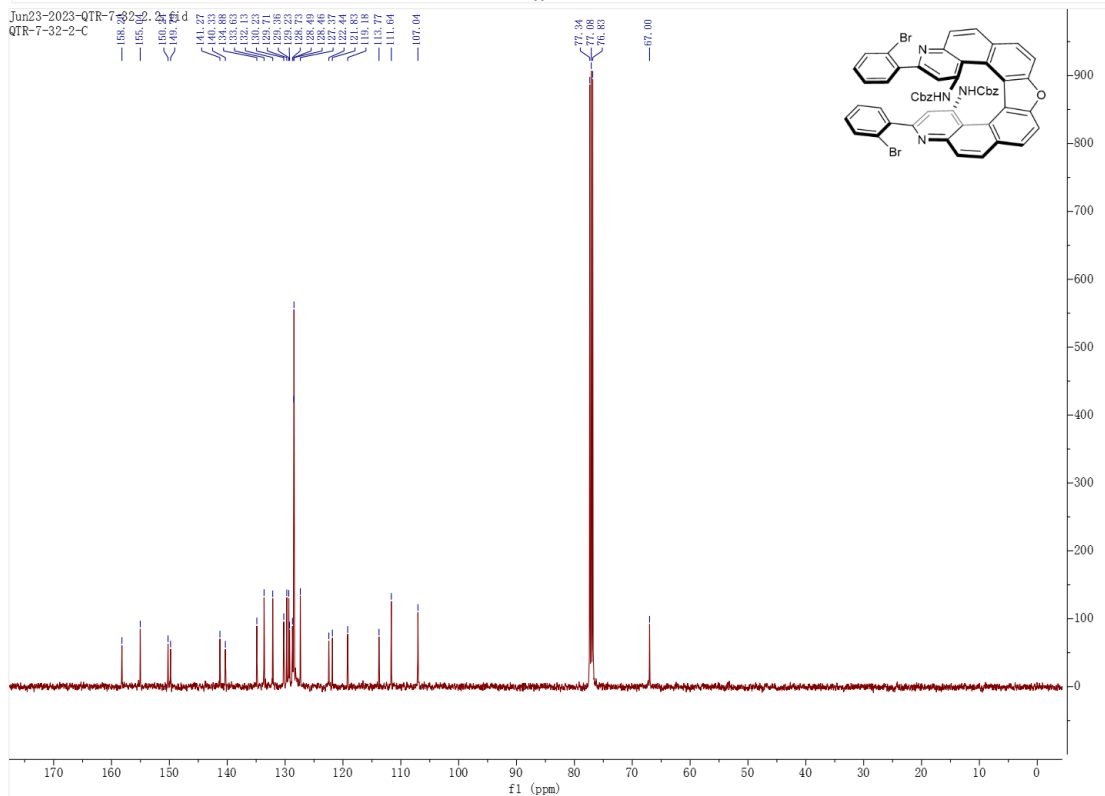

# Helicene 6j





# Helicene 6l

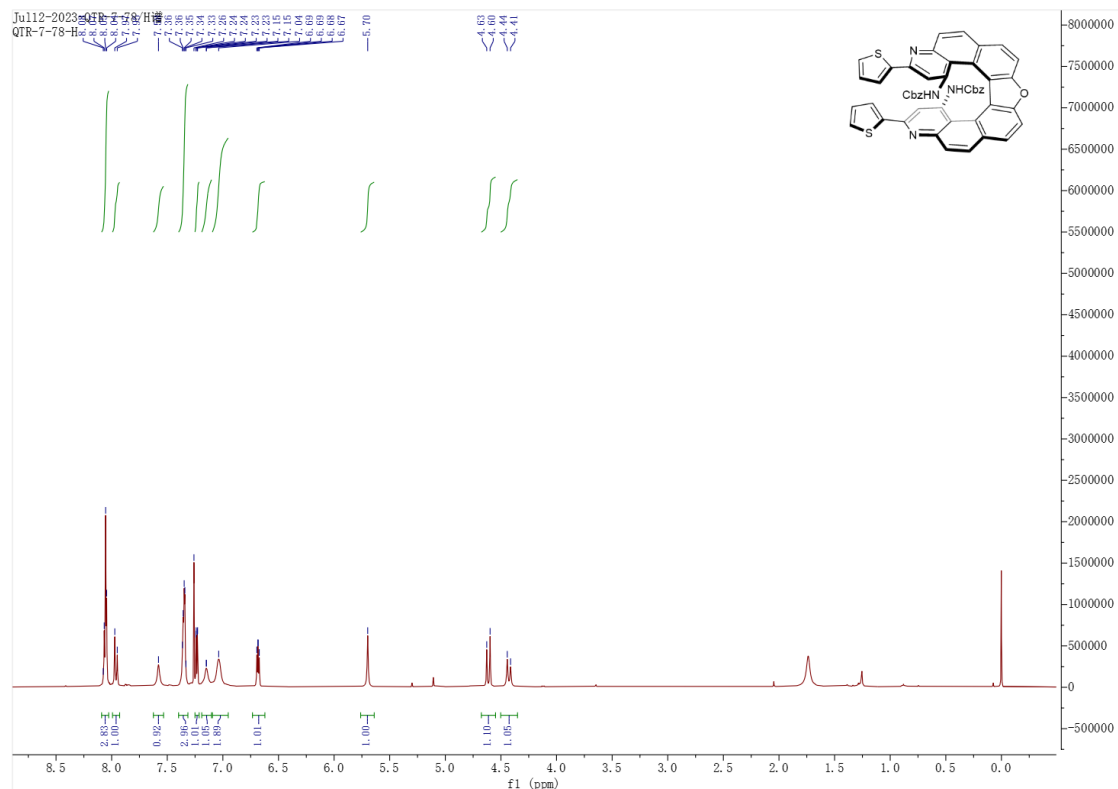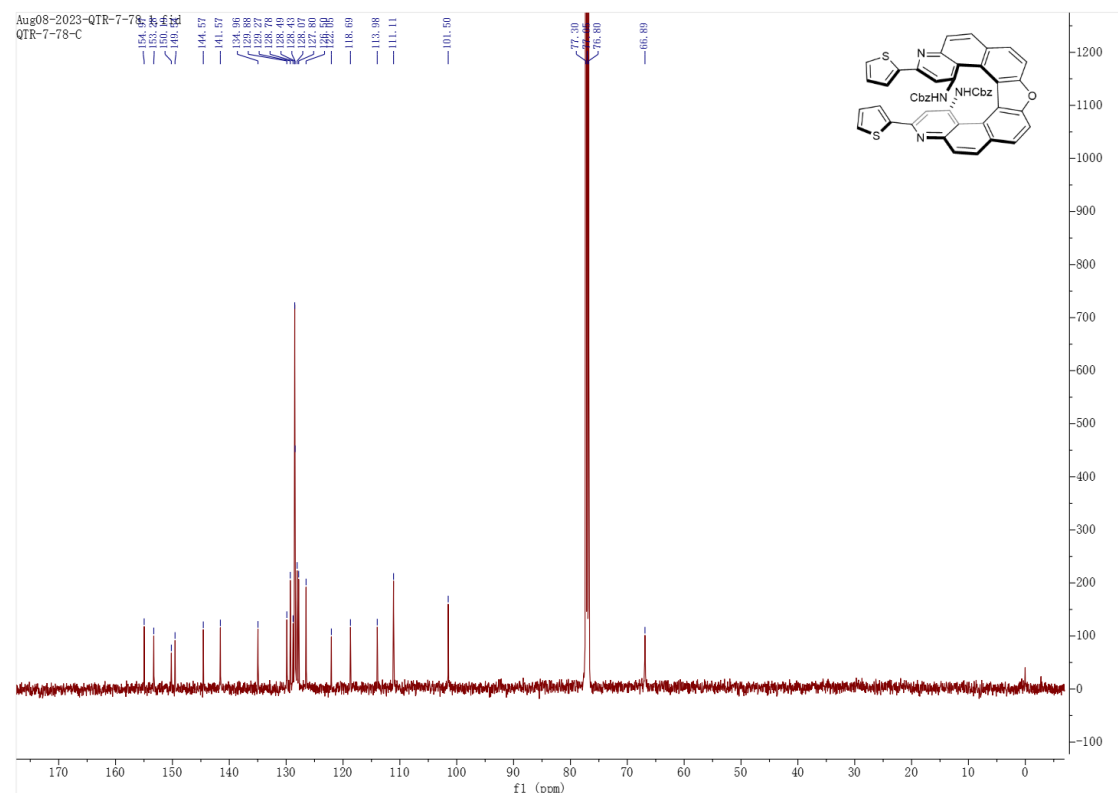

# Helicene 7a

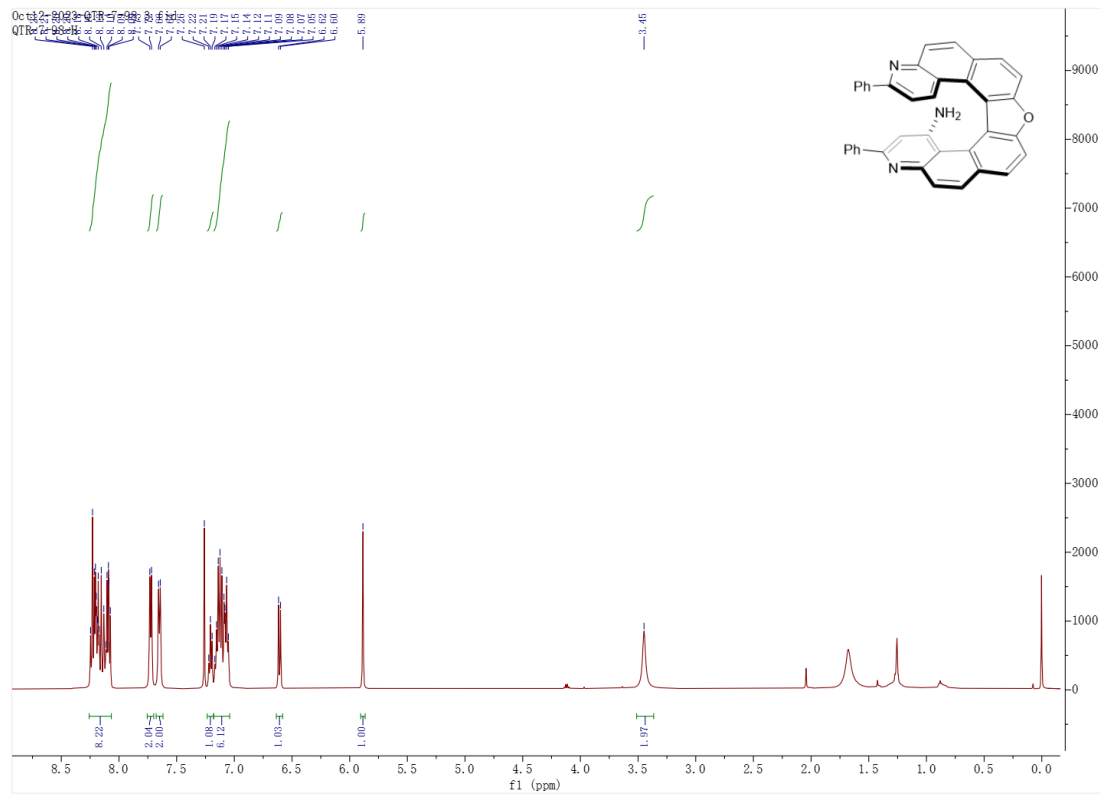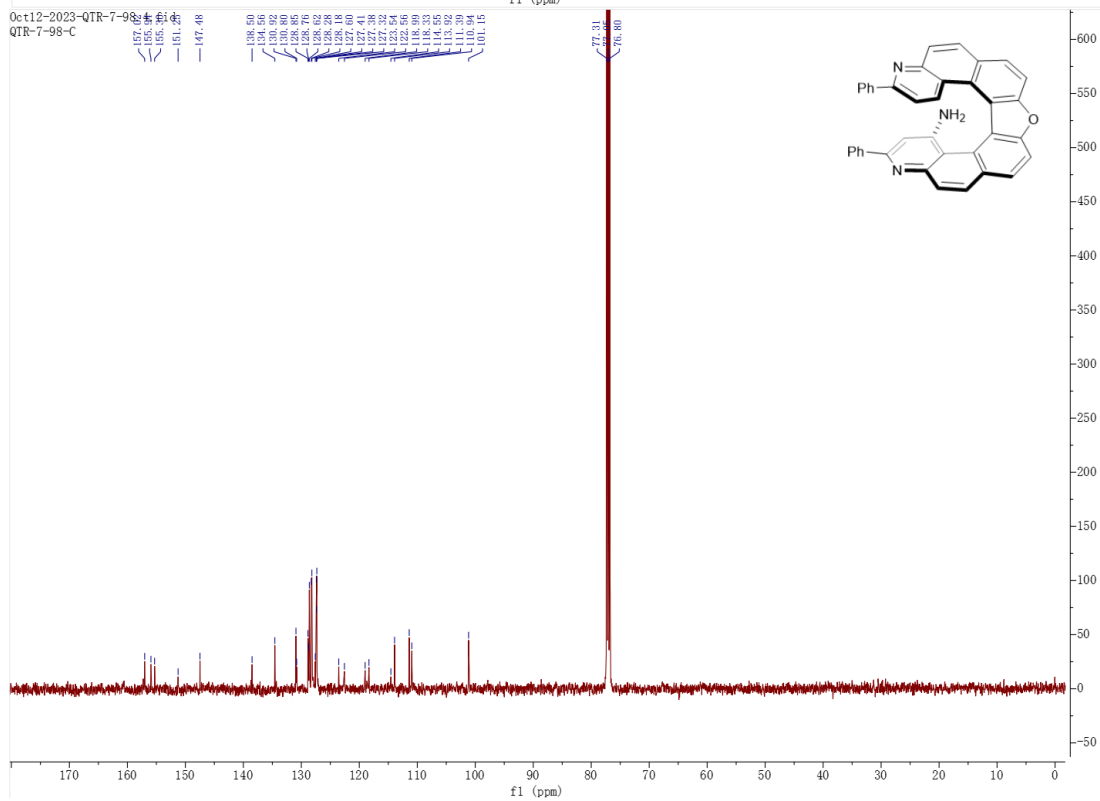

# Helicene 8a

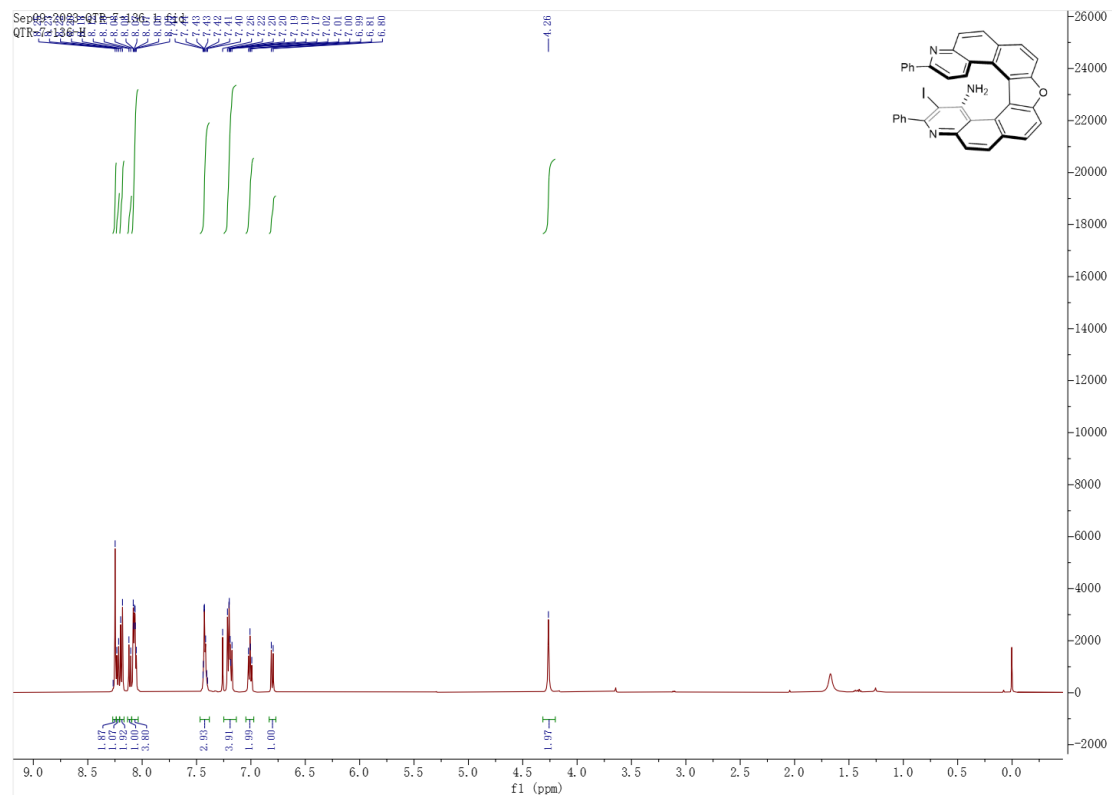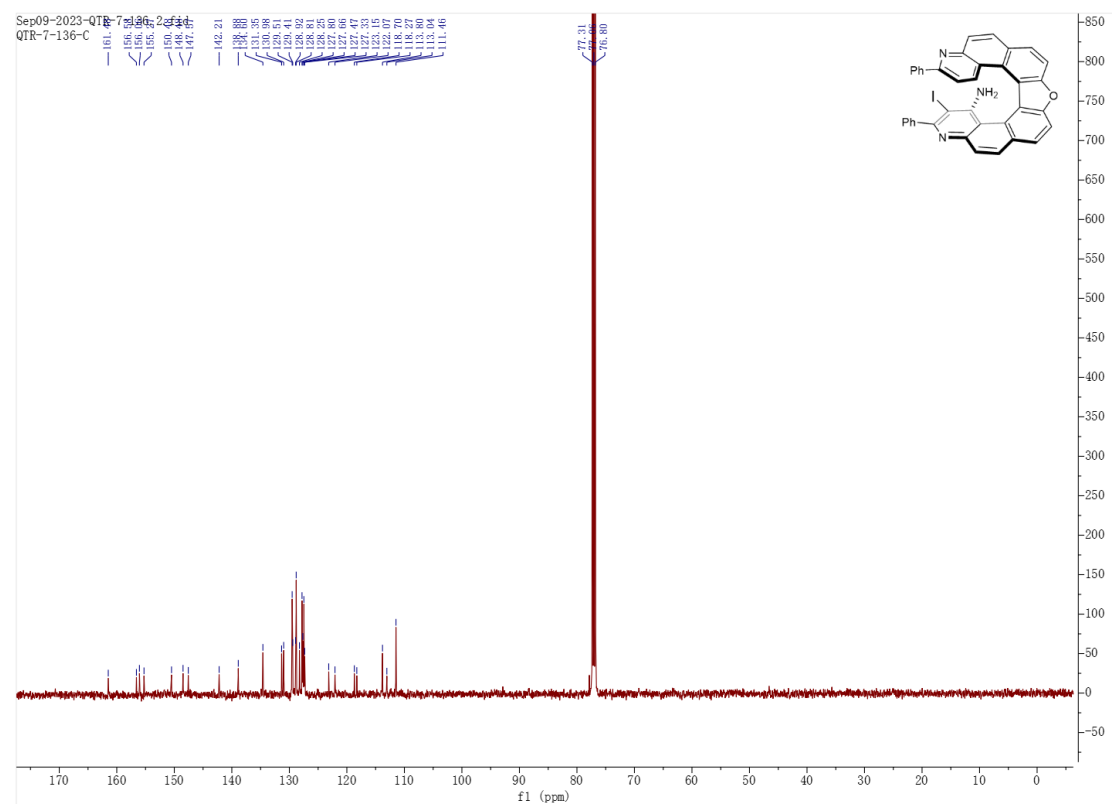

# Helicene 9a

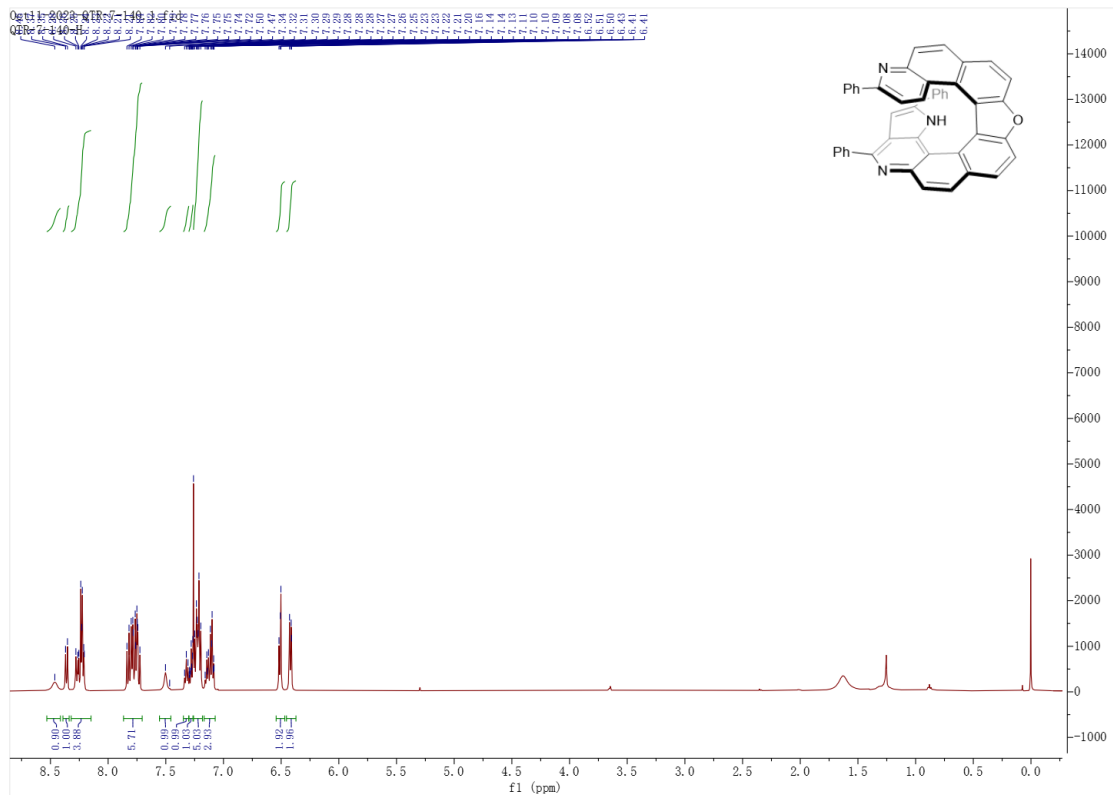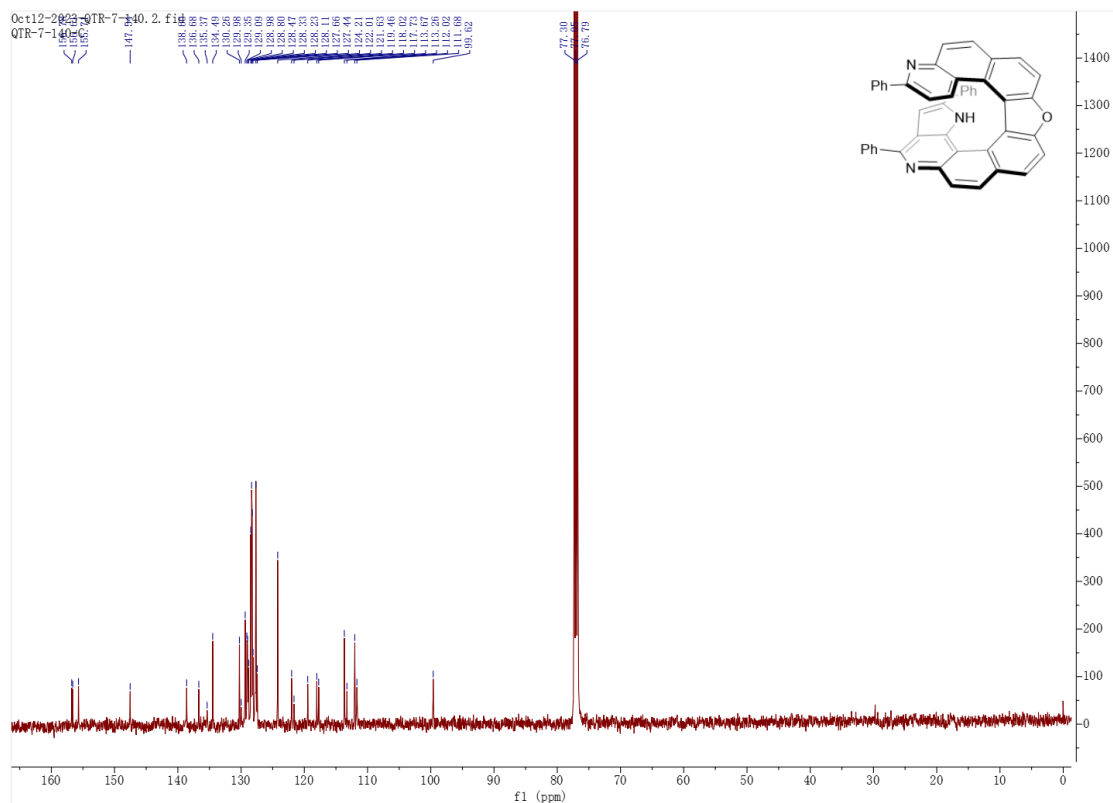



# Helicene 10a

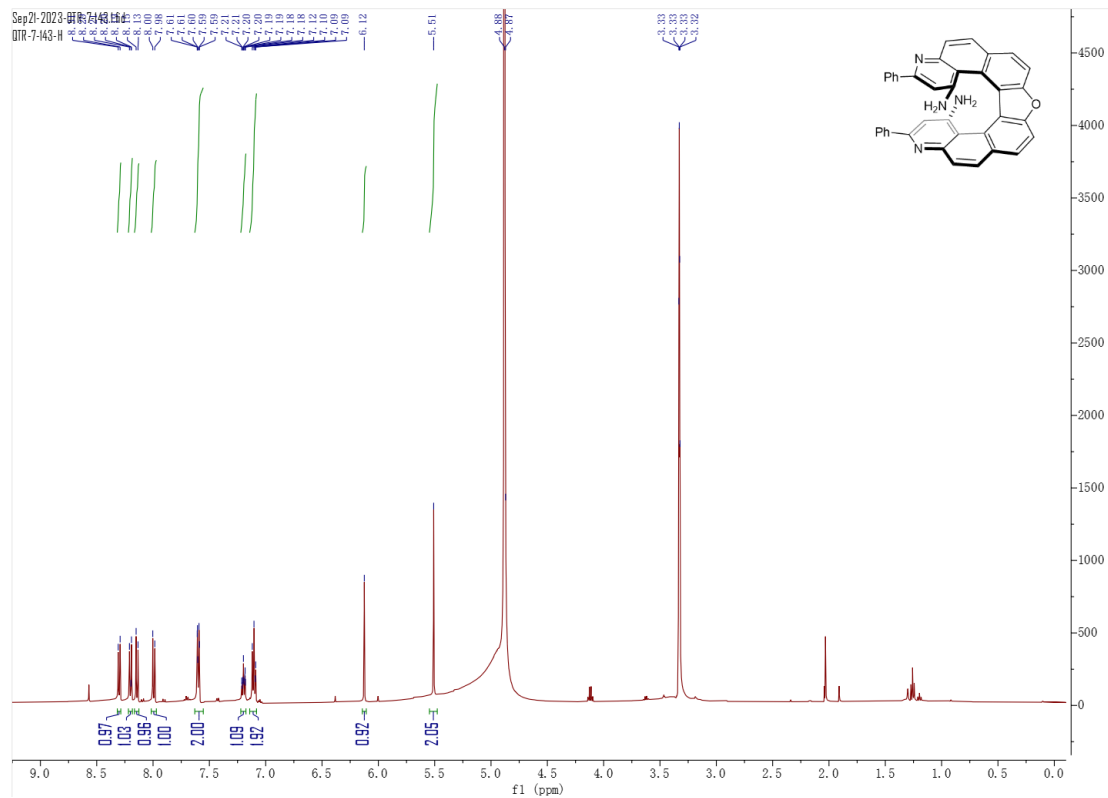

# Helicene 11a

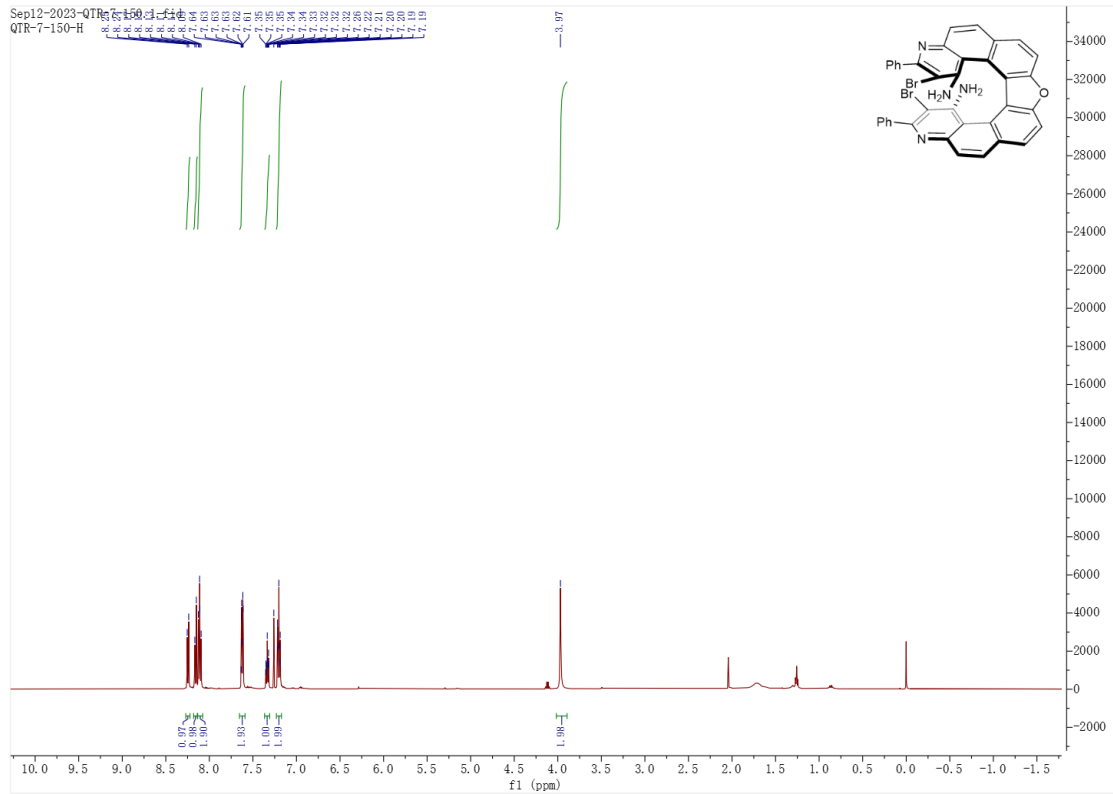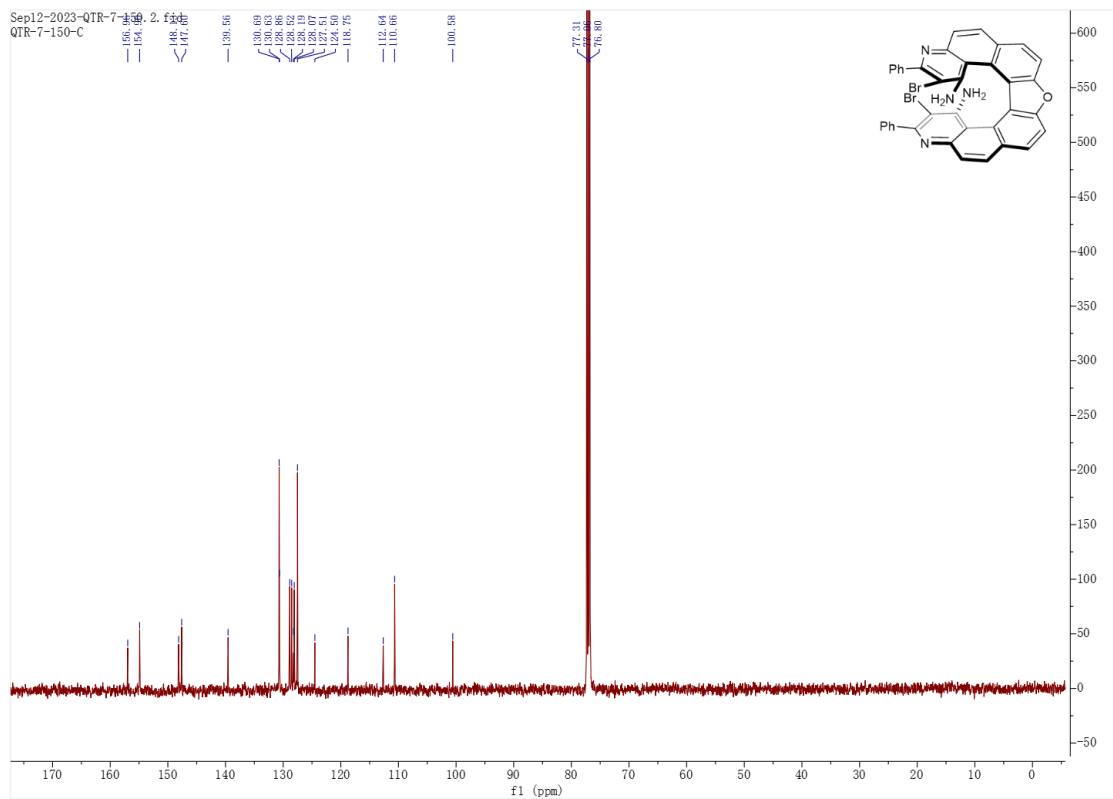

Supplement: d4qo02188f1.pdf [file d4qo02188f1.pdf]
